# Supplementary material for: Data compression to define information content of hydrological time series
Source: Copernicus journal article supplement (doi:10.5194/hess-17-3171-2013), 2013-08-06
Supplement: Supplementary file 1 [file basin_info.xls]

## Sheet: Sheet1
gaugenr	gauge_nr_int	latitude	longitude	koeppen_climate_class	koeppen_nr	area_(m^2)	P/ET	Q/P	ET/PET
01048000	1048000	44.7072	-69.9392	Dfb	42	1.33125e+09	1.58	0.46	0.85
01055500	1055500	44.2694	-70.2303	Dfb	42	4.37708e+08	1.65	0.48	0.86
01060000	1060000	43.7992	-70.1792	Dfb	42	3.65188e+08	1.62	0.47	0.85
01064500	1064500	43.9908	-71.0914	Dfb	42	9.97145e+08	1.93	0.53	0.9
01076500	1076500	43.7592	-71.6861	Dfb	42	1.61097e+09	1.48	0.44	0.83
01127000	1127000	41.598	-71.985	Dfa	41	1.84666e+09	1.6	0.47	0.85
01138000	1138000	44.154	-71.986	Dfb	42	1.02305e+09	1.52	0.45	0.84
01197500	1197500	42.232	-73.355	Dfb	42	7.30377e+08	1.57	0.46	0.85
01200000	1200000	41.659	-73.529	Dfa	41	5.25768e+08	1.48	0.44	0.83
01321000	1321000	43.3528	-74.2708	Dfb	42	1.27168e+09	1.88	0.53	0.88
01329000	1329000	43.0772	-73.1572	Dfb	42	3.93678e+08	1.47	0.44	0.83
01329500	1329500	43.1014	-73.4319	Dfb	42	1.02046e+09	1.45	0.43	0.82
01334500	1334500	42.9386	-73.3775	Csb	35	1.32089e+09	1.46	0.43	0.83
01348000	1348000	43.0167	-74.7411	Dfb	42	7.48507e+08	1.72	0.5	0.86
01361000	1361000	42.3306	-73.7444	Dfa	41	8.52106e+08	1.39	0.42	0.81
01371500	1371500	41.686	-74.166	Dfa	41	1.84148e+09	1.51	0.45	0.83
01372500	1372500	41.6531	-73.8731	Dfa	41	4.68788e+08	1.58	0.46	0.85
01421000	1421000	41.9731	-75.1744	Dfb	42	2.03055e+09	1.58	0.46	0.85
01423000	1423000	42.1661	-75.1403	Dfb	42	8.59876e+08	1.49	0.44	0.83
01426500	1426500	42.0031	-75.3839	Dfb	42	1.54104e+09	1.47	0.44	0.83
01445000	1445000	40.9811	-74.7767	Cfa	31	8.02896e+07	1.52	0.45	0.84
01445500	1445500	40.8306	-74.9786	Cfa	31	2.74539e+08	1.5	0.45	0.83
01500500	1500500	42.321	-75.317	Dfb	42	2.54337e+09	1.43	0.43	0.82
01503000	1503000	42.0353	-75.8033	Dfb	42	5.78085e+09	1.45	0.43	0.82
01512500	1512500	42.2181	-75.8486	Dfb	42	3.84095e+09	1.36	0.41	0.81
01514000	1514000	42.1292	-76.2708	Dfb	42	4.79148e+08	1.34	0.4	0.8
01518000	1518000	41.9083	-77.1297	Dfb	42	7.30377e+08	1.37	0.41	0.81
01520000	1520000	41.9967	-77.1403	Dfb	42	7.71816e+08	1.37	0.41	0.81
01520500	1520500	42.0286	-77.1325	Dfb	42	1.99688e+09	1.38	0.41	0.81
01531000	1531000	42.0022	-76.635	Dfb	42	6.49051e+09	1.34	0.4	0.8
01534000	1534000	41.5583	-75.895	Dfb	42	9.91965e+08	1.32	0.4	0.8
01541000	1541000	40.8969	-78.6772	Dfb	42	8.15846e+08	1.58	0.47	0.85
01541500	1541500	40.9717	-78.4061	Dfb	42	9.60886e+08	1.57	0.46	0.84
01543500	1543500	41.3172	-78.1033	Dfb	42	1.77414e+09	1.56	0.46	0.84
01548500	1548500	41.5217	-77.4478	Dfb	42	1.56435e+09	1.47	0.44	0.83
01556000	1556000	40.4631	-78.2	Cfb	32	7.53687e+08	1.6	0.47	0.85
01558000	1558000	40.6125	-78.1408	Dfb	42	5.69797e+08	1.47	0.44	0.83
01559000	1559000	40.485	-78.019	Cfb	32	2.11343e+09	1.5	0.44	0.83
01560000	1560000	40.0717	-78.4928	Cfb	32	4.45478e+08	1.49	0.44	0.83
01562000	1562000	40.2158	-78.2656	Cfb	32	1.95803e+09	1.42	0.42	0.82
01567000	1567000	40.4783	-77.1294	Cfa	31	8.68682e+09	1.35	0.4	0.81
01574000	1574000	40.0822	-76.7203	Cfa	31	1.32089e+09	1.19	0.35	0.76
01595000	1595000	39.3019	-79.3072	Cfb	32	1.89069e+08	1.81	0.52	0.88
01606500	1606500	38.991	-79.176	Cfb	32	1.66277e+09	1.74	0.5	0.87
01608500	1608500	39.4469	-78.6544	Cfa	31	3.80987e+09	1.64	0.47	0.86
01610000	1610000	39.5369	-78.4578	Cfa	31	8.05227e+09	1.6	0.46	0.86
01611500	1611500	39.5786	-78.3094	Cfa	31	1.75342e+09	1.2	0.36	0.77
01628500	1628500	38.322	-78.755	Cfa	31	2.80755e+09	1.32	0.39	0.8
01631000	1631000	38.9139	-78.2111	Cfa	31	4.25276e+09	1.26	0.38	0.78
01634000	1634000	38.9767	-78.3364	Cfa	31	1.98911e+09	1.23	0.37	0.78
01643000	1643000	39.388	-77.38	Cfa	31	2.11602e+09	1.15	0.34	0.76
01649500	1649500	38.96	-76.926	Cfa	31	1.89069e+08	1.12	0.33	0.74
01663500	1663500	38.5917	-77.9653	Cfa	31	7.43327e+08	1.15	0.34	0.76
01664000	1664000	38.5306	-77.8139	Cfa	31	1.60579e+09	1.16	0.35	0.76
01667500	1667500	38.3503	-77.9753	Cfa	31	1.22247e+09	1.2	0.36	0.77
01668000	1668000	38.3222	-77.5181	Cfa	31	4.13362e+09	1.2	0.36	0.77
01672500	1672500	37.797	-77.549	Cfa	31	1.02046e+09	1.17	0.35	0.76
01674500	1674500	37.888	-77.163	Cfa	31	1.55658e+09	1.16	0.35	0.76
02016000	2016000	37.7917	-79.7597	Cfa	31	1.19398e+09	1.49	0.44	0.83
02018000	2018000	37.6658	-79.9117	Cfa	31	8.52106e+08	1.29	0.39	0.79
02030500	2030500	37.7028	-78.3778	Cfa	31	5.85337e+08	1.24	0.37	0.78
02055000	2055000	37.2583	-79.9389	Cfa	31	1.02305e+09	1.21	0.36	0.77
02058400	2058400	36.9458	-79.525	Cfa	31	9.06496e+08	1.47	0.44	0.83
02083500	2083500	35.8939	-77.5333	Cfa	31	5.65394e+09	1.18	0.35	0.76
02102000	2102000	35.6272	-79.1161	Cfa	31	3.71404e+09	1.24	0.37	0.78
02116500	2116500	35.8567	-80.3861	Cfa	31	5.90517e+09	1.59	0.47	0.85
02118000	2118000	35.845	-80.659	Cfa	31	7.92536e+08	1.47	0.44	0.83
02121000	2121000	35.725	-80.3972	Cfa	31	8.98726e+09	1.5	0.44	0.84
02126000	2126000	35.1483	-80.1758	Cfa	31	3.55346e+09	1.24	0.37	0.78
02135000	2135000	34.0569	-79.2472	Cfa	31	7.22607e+09	1.14	0.34	0.75
02138500	2138500	35.7947	-81.8903	Cfa	31	1.73529e+08	1.77	0.51	0.87
02143000	2143000	35.684	-81.403	Cfa	31	2.14969e+08	1.58	0.46	0.85
02143040	2143040	35.5906	-81.5672	Cfa	31	6.73397e+07	1.63	0.48	0.85
02143500	2143500	35.4222	-81.2644	Cfa	31	1.78709e+08	1.48	0.44	0.83
02156500	2156500	34.5961	-81.4222	Cfa	31	7.22607e+09	1.58	0.46	0.86
02165000	2165000	34.4444	-82.1764	Cfa	31	6.11237e+08	1.38	0.41	0.81
02174000	2174000	33.1764	-80.8014	Cfa	31	4.45478e+09	1.13	0.34	0.75
02192000	2192000	33.9742	-82.77	Cfa	31	3.70368e+09	1.4	0.42	0.82
02202000	2202000	32.7106	-81.8794	Cfa	31	5.02458e+09	1.11	0.33	0.74
02202500	2202500	32.1914	-81.4161	Cfa	31	6.86347e+09	1.1	0.33	0.74
02217500	2217500	33.9467	-83.4228	Cfa	31	1.03082e+09	1.5	0.44	0.83
02218500	2218500	33.5811	-83.2728	Cfa	31	2.82309e+09	1.37	0.41	0.81
02219500	2219500	33.6086	-83.3494	Cfa	31	1.12923e+09	1.32	0.4	0.8
02228000	2228000	31.2211	-81.8675	Cfa	31	7.22607e+09	1.12	0.33	0.75
02236000	2236000	29.0081	-81.3828	Cfa	31	7.9409e+09	1.03	0.3	0.72
02273000	2273000	27.2256	-80.9628	Cfa	31	7.47471e+09	1.03	0.3	0.72
02296750	2296750	27.2219	-81.8761	Cfa	31	3.54051e+09	1.07	0.32	0.73
02329000	2329000	30.5539	-84.3842	Cfa	31	2.95259e+09	1.29	0.39	0.79
02339500	2339500	32.8861	-85.1822	Cfa	31	9.19446e+09	1.48	0.44	0.83
02347500	2347500	32.7214	-84.2325	Cfa	31	4.79148e+09	1.31	0.39	0.79
02349500	2349500	32.2981	-84.0439	Cfa	31	7.51097e+09	1.26	0.38	0.78
02365500	2365500	30.776	-85.828	Cfa	31	9.06237e+09	1.42	0.42	0.82
02375500	2375500	30.965	-87.2342	Cfa	31	9.88598e+09	1.46	0.43	0.82
02383500	2383500	34.5642	-84.8331	Cfa	31	2.15228e+09	1.55	0.46	0.84
02387000	2387000	34.667	-84.928	Cfa	31	1.77932e+09	1.55	0.46	0.84
02387500	2387500	34.5783	-84.9414	Cfa	31	4.14916e+09	1.53	0.45	0.84
02414500	2414500	33.1167	-85.5608	Cfa	31	4.33823e+09	1.47	0.44	0.83
02437000	2437000	33.9853	-88.5508	Cfa	31	4.9935e+09	1.36	0.41	0.81
02448000	2448000	33.1022	-88.5611	Cfa	31	1.98911e+09	1.38	0.41	0.81
02456500	2456500	33.7097	-86.9833	Cfa	31	2.29214e+09	1.47	0.44	0.83
02472000	2472000	31.707	-89.407	Cfa	31	1.92436e+09	1.41	0.42	0.82
02475000	2475000	31.103	-88.808	Cfa	31	9.05201e+09	1.45	0.43	0.82
02475500	2475500	32.3264	-88.9097	Cfa	31	9.55706e+08	1.41	0.42	0.82
02478500	2478500	31.148	-88.548	Cfa	31	6.96707e+09	1.42	0.42	0.82
02479300	2479300	30.7361	-88.7806	Cfa	31	1.14218e+09	1.48	0.44	0.83
02482000	2482000	32.798	-89.335	Cfa	31	2.34135e+09	1.36	0.41	0.81
02486000	2486000	32.2817	-90.1786	Cfa	31	8.21285e+09	1.34	0.4	0.8
02492000	2492000	30.6292	-89.8972	Cfa	31	3.14166e+09	1.52	0.45	0.84
03010500	3010500	41.9633	-78.3864	Dfa	41	1.42449e+09	1.6	0.47	0.85
03011020	3011020	42.1564	-78.7156	Dfb	42	4.1647e+09	1.57	0.46	0.84
03020500	3020500	41.4817	-79.6956	Dfb	42	7.76996e+08	1.51	0.45	0.83
03024000	3024000	41.4375	-79.9561	Dfb	42	2.66251e+09	1.37	0.41	0.81
03032500	3032500	40.9944	-79.3944	Dfb	42	1.36751e+09	1.52	0.45	0.84
03050500	3050500	38.925	-79.879	Dfb	42	7.04477e+08	1.96	0.54	0.89
03051000	3051000	39.0292	-79.9361	Cfb	32	1.05672e+09	1.91	0.53	0.89
03054500	3054500	39.15	-80.04	Cfa	31	2.37243e+09	1.76	0.5	0.87
03065000	3065000	39.072	-79.622	Cfb	32	8.93546e+08	1.82	0.52	0.88
03069000	3069000	39.096	-79.678	Cfb	32	5.54257e+08	1.93	0.54	0.89
03069500	3069500	39.1222	-79.6806	Cfb	32	1.85961e+09	1.87	0.53	0.89
03070000	3070000	39.347	-79.666	Cfb	32	2.42682e+09	1.85	0.52	0.88
03075500	3075500	39.4219	-79.4256	Cfb	32	3.47058e+08	1.74	0.5	0.87
03079000	3079000	39.8597	-79.2278	Cfb	32	9.89375e+08	1.6	0.47	0.85
03109500	3109500	40.6758	-80.5408	Dfb	42	1.28463e+09	1.22	0.37	0.77
03111500	3111500	40.193	-80.734	Cfa	31	3.18569e+08	1.24	0.37	0.78
03114500	3114500	39.475	-80.9972	Cfa	31	1.18621e+09	1.46	0.43	0.83
03136000	3136000	40.5147	-82.1956	BSk	26	2.45531e+09	1.15	0.34	0.75
03155500	3155500	39.119	-81.278	Cfa	31	1.17067e+09	1.43	0.43	0.82
03159500	3159500	39.3289	-82.0878	Cfa	31	2.44236e+09	1.23	0.37	0.77
03161000	3161000	36.3931	-81.4072	Cfb	32	5.30948e+08	1.75	0.5	0.87
03164000	3164000	36.6472	-80.9792	Cfb	32	2.92928e+09	1.7	0.49	0.86
03165500	3165500	36.835	-80.953	Cfb	32	3.47058e+09	1.68	0.49	0.86
03167000	3167000	36.9394	-80.8869	Cfb	32	6.39727e+08	1.47	0.44	0.83
03168000	3168000	36.937	-80.746	Cfb	32	5.70315e+09	1.63	0.48	0.86
03173000	3173000	37.2681	-80.7097	Cfb	32	7.89946e+08	1.4	0.42	0.81
03175500	3175500	37.3056	-80.85	Cfb	32	5.77567e+08	1.45	0.43	0.82
03179000	3179000	37.5439	-81.0106	Cfb	32	1.02046e+09	1.5	0.45	0.83
03180500	3180500	38.5436	-79.8333	Dfb	42	3.44468e+08	2.03	0.56	0.9
03182500	3182500	38.1858	-80.1308	Cfb	32	1.39859e+09	1.82	0.52	0.88
03183500	3183500	37.7242	-80.6417	Cfb	32	3.53274e+09	1.63	0.48	0.86
03184000	3184000	37.64	-80.805	Cfb	32	4.19319e+09	1.61	0.47	0.85
03186500	3186500	38.3789	-80.4842	Cfb	32	3.31518e+08	1.88	0.53	0.88
03198500	3198500	38.1797	-81.7117	Cfa	31	1.01269e+09	1.63	0.48	0.85
03199000	3199000	38.08	-81.836	Cfa	31	6.96707e+08	1.61	0.47	0.85
03213000	3213000	37.486	-81.844	Cfa	31	1.30535e+09	1.54	0.45	0.84
03214000	3214000	37.818	-82.389	Cfa	31	3.07691e+09	1.54	0.45	0.84
03237500	3237500	38.8036	-83.4211	Cfa	31	1.00233e+09	1.33	0.4	0.8
03238500	3238500	38.858	-83.929	Cfa	31	5.64617e+08	1.32	0.39	0.8
03251500	3251500	38.598	-84.267	Cfa	31	6.02431e+09	1.42	0.42	0.82
03252500	3252500	38.3908	-84.3031	Cfa	31	1.60838e+09	1.36	0.41	0.81
03253500	3253500	38.7103	-84.3108	Cfa	31	8.54696e+09	1.41	0.42	0.82
03265000	3265000	40.0578	-84.3561	Dfa	41	1.30276e+09	1.13	0.34	0.75
03266000	3266000	39.8694	-84.2825	Dfa	41	1.68349e+09	1.15	0.34	0.76
03269500	3269500	39.9231	-83.8703	Dfa	41	1.26909e+09	1.12	0.33	0.75
03274000	3274000	39.3911	-84.5722	Cfa	31	9.40166e+09	1.17	0.35	0.76
03281500	3281500	37.4792	-83.6772	Cfa	31	1.86997e+09	1.53	0.45	0.84
03289500	3289500	38.269	-84.815	Cfa	31	1.04118e+09	1.35	0.4	0.8
03301500	3301500	37.7672	-85.7039	Cfa	31	3.36439e+09	1.43	0.43	0.82
03303000	3303000	38.237	-86.228	Cfa	31	7.35557e+08	1.33	0.4	0.8
03308500	3308500	37.2681	-85.8861	Cfa	31	4.33305e+09	1.48	0.44	0.83
03324300	3324300	40.7125	-85.4536	Dfa	41	1.10074e+09	1.12	0.33	0.75
03326500	3326500	40.5761	-85.6594	Dfa	41	1.76637e+09	1.13	0.34	0.75
03328500	3328500	40.7819	-86.2639	Dfa	41	2.0435e+09	1.09	0.32	0.74
03331500	3331500	41.157	-86.564	Dfa	41	2.21703e+09	1.09	0.32	0.74
03339500	3339500	40.0489	-86.8994	Dfa	41	1.3183e+09	1.13	0.34	0.75
03345500	3345500	38.9361	-88.0194	Cfa	31	3.92642e+09	1.04	0.31	0.72
03346000	3346000	39.0103	-87.9464	Cfa	31	8.23616e+08	1.07	0.32	0.73
03348000	3348000	40.106	-85.672	Dfa	41	1.05154e+09	1.14	0.34	0.75
03349000	3349000	40.047	-86.017	Dfa	41	2.22221e+09	1.15	0.34	0.75
03361500	3361500	39.529	-85.782	Csb	35	1.09038e+09	1.19	0.36	0.77
03361650	3361650	39.7142	-85.8856	Cfa	31	2.43459e+08	1.17	0.35	0.76
03362500	3362500	39.3608	-85.9975	Cfa	31	1.22765e+09	1.21	0.36	0.77
03363000	3363000	39.339	-85.986	Cfa	31	2.74539e+09	1.2	0.36	0.77
03364000	3364000	39.2	-85.9256	Cfa	31	4.42111e+09	1.21	0.36	0.77
03365500	3365500	38.983	-85.899	Cfa	31	6.06316e+09	1.23	0.37	0.78
03381500	3381500	38.0611	-88.1597	Cfa	31	8.03414e+09	1.04	0.31	0.72
03410500	3410500	36.627	-84.533	Cfa	31	2.47085e+09	1.7	0.49	0.86
03438000	3438000	36.7778	-87.7217	Cfa	31	6.31957e+08	1.3	0.39	0.79
03443000	3443000	35.299	-82.624	Cfa	31	7.66636e+08	2.68	0.64	0.97
03448000	3448000	35.5019	-82.5925	Cfb	32	1.75083e+09	2.45	0.61	0.96
03451500	3451500	35.6092	-82.5786	Cfb	32	2.44754e+09	2.34	0.59	0.96
03455000	3455000	35.982	-83.161	Cfa	31	4.8122e+09	2.14	0.56	0.93
03465500	3465500	36.1764	-82.4575	Cfb	32	2.08494e+09	1.55	0.46	0.84
03470000	3470000	35.878	-83.578	Cfa	31	9.14266e+08	1.58	0.46	0.85
03473000	3473000	36.6517	-81.8442	Cfb	32	7.79586e+08	1.55	0.46	0.84
03490000	3490000	36.609	-82.568	Cfa	31	1.74047e+09	1.56	0.46	0.84
03504000	3504000	35.1269	-83.6192	Cfa	31	1.34679e+08	2.08	0.57	0.9
03512000	3512000	35.4614	-83.3536	Cfa	31	4.76558e+08	1.94	0.54	0.89
03521500	3521500	37.086	-81.781	Cfb	32	3.54828e+08	1.53	0.45	0.84
03524000	3524000	36.9447	-82.155	Cfa	31	1.36751e+09	1.54	0.45	0.84
03528000	3528000	36.425	-83.3983	Cfa	31	3.81764e+09	1.61	0.47	0.85
03531500	3531500	36.662	-83.095	Cfa	31	8.26206e+08	1.71	0.5	0.86
03532000	3532000	36.5417	-83.6303	Cfa	31	1.77414e+09	1.75	0.5	0.87
03540500	3540500	35.9831	-84.5581	Cfa	31	1.97875e+09	1.72	0.5	0.87
03550000	3550000	35.1389	-83.9806	Cfa	31	2.69359e+08	1.92	0.54	0.89
03567500	3567500	35.014	-85.207	Cfa	31	1.10851e+09	1.63	0.48	0.85
03574500	3574500	34.6242	-86.3064	Cfa	31	8.28796e+08	1.53	0.45	0.84
03603000	3603000	35.93	-87.7431	Cfa	31	6.6226e+09	1.48	0.44	0.83
04073500	4073500	43.9539	-88.9522	Dfb	42	3.47058e+09	0.9	0.26	0.67
04079000	4079000	44.3922	-88.7403	Dfb	42	5.85337e+09	1.05	0.31	0.72
04100500	4100500	41.5933	-85.8486	Cfb	32	1.53845e+09	1.08	0.32	0.73
04113000	4113000	42.751	-84.555	Dfb	42	3.18569e+09	1.03	0.3	0.72
04115000	4115000	43.11	-84.693	Dfb	42	1.12405e+09	1.05	0.31	0.72
04144000	4144000	42.824	-83.946	Dfb	42	9.53116e+08	0.98	0.29	0.7
04164000	4164000	42.578	-82.95	Dfa	41	1.14995e+09	0.98	0.28	0.7
04165500	4165500	42.596	-82.91	Dfb	42	1.90105e+09	0.98	0.29	0.7
04176500	4176500	41.961	-83.531	Dfb	42	2.69877e+09	1.05	0.31	0.72
04178000	4178000	41.386	-84.802	Dfa	41	1.57989e+09	1.04	0.31	0.72
04183500	4183500	41.1989	-84.7444	Dfa	41	5.51408e+09	1.06	0.31	0.73
04185000	4185000	41.504	-84.43	Dfb	42	1.0619e+09	1.05	0.31	0.72
04191500	4191500	41.2375	-84.3992	Dfa	41	5.98287e+09	1.04	0.31	0.72
04198000	4198000	41.3078	-83.1589	Dfa	41	3.24008e+09	1.05	0.31	0.72
04201500	4201500	41.4067	-81.8872	Dfa	41	6.91527e+08	1.11	0.33	0.74
04212000	4212000	41.7406	-81.0467	Dfb	42	1.50478e+09	1.25	0.38	0.78
04221000	4221000	42.1222	-77.9575	Dfb	42	7.45917e+08	1.38	0.41	0.81
04221500	4221500	42.1639	-77.9806	Dfb	42	7.97716e+08	1.38	0.41	0.81
04223000	4223000	42.5703	-78.0425	Dfb	42	2.54855e+09	1.49	0.44	0.83
05053000	5053000	46.4681	-96.7833	Dfb	42	5.38718e+09	0.51	0.11	0.45
05244000	5244000	46.6403	-94.8789	Dfb	42	2.61589e+09	0.77	0.21	0.61
05280000	5280000	45.0867	-93.7339	Dfb	42	6.52677e+09	0.71	0.19	0.58
05320500	5320500	44.1111	-94.0411	Dfa	41	2.87489e+09	0.79	0.22	0.62
05383000	5383000	43.9014	-91.1181	Dfb	42	1.03082e+09	0.9	0.26	0.67
05408000	5408000	43.5742	-90.6431	Dfb	42	6.88937e+08	0.88	0.25	0.66
05410490	5410490	43.1828	-90.8583	Dfa	41	1.77932e+09	0.85	0.24	0.65
05410500	5410500	43.191	-90.874	Dfa	41	1.78709e+09	0.85	0.24	0.65
05412500	5412500	42.74	-91.2617	Dfa	41	4.00153e+09	0.89	0.25	0.66
05418500	5418500	42.0847	-90.6344	Dfa	41	4.02225e+09	0.88	0.25	0.66
05422000	5422000	41.7669	-90.5347	Dfa	41	6.03467e+09	0.89	0.25	0.66
05430500	5430500	42.6092	-89.0706	Dfa	41	8.65056e+09	0.89	0.25	0.67
05435500	5435500	42.3036	-89.6158	Dfa	41	3.43432e+09	0.88	0.25	0.66
05440000	5440000	42.1958	-88.9986	Dfa	41	2.8464e+09	0.96	0.28	0.69
05447500	5447500	41.4889	-90.1583	Dfa	41	2.59776e+09	0.92	0.26	0.68
05451500	5451500	42.0658	-92.9075	Dfa	41	4.05074e+09	0.84	0.23	0.64
05452000	5452000	41.964	-92.313	Dfa	41	5.20588e+08	0.89	0.25	0.66
05454500	5454500	41.6567	-91.5408	Dfa	41	8.47185e+09	0.85	0.24	0.65
05455500	5455500	41.4664	-91.7156	Dfa	41	1.48406e+09	0.89	0.25	0.67
05457700	5457700	43.0625	-92.6731	Dfa	41	2.72985e+09	0.84	0.24	0.64
05458500	5458500	42.6483	-92.465	Dfa	41	4.30197e+09	0.85	0.24	0.65
05462000	5462000	42.6528	-92.5958	Dfa	41	4.52212e+09	0.83	0.23	0.64
05471500	5471500	41.355	-92.659	Dfa	41	4.23463e+09	0.84	0.24	0.65
05472500	5472500	41.3008	-92.2044	Dfa	41	1.89069e+09	0.87	0.25	0.66
05476500	5476500	43.3975	-94.8439	Dfa	41	3.55346e+09	0.67	0.17	0.55
05479000	5479000	42.7239	-94.1917	Dfa	41	3.3877e+09	0.76	0.2	0.6
05481000	5481000	42.4336	-93.8033	Dfa	41	2.18595e+09	0.82	0.23	0.63
05482500	5482500	41.9881	-94.3767	Dfa	41	4.19319e+09	0.77	0.21	0.61
05484500	5484500	41.5339	-93.9497	Dfa	41	8.91215e+09	0.8	0.22	0.62
05502040	5502040	39.693	-91.149	Dfa	41	1.89069e+08	1.02	0.3	0.72
05507500	5507500	39.54	-91.672	Dfa	41	5.77567e+09	1	0.29	0.71
05508000	5508000	39.612	-91.408	Dfa	41	6.42317e+09	1	0.29	0.71
05514500	5514500	39.0164	-90.9833	Cfa	31	2.33876e+09	1.03	0.3	0.72
05515500	5515500	41.4	-86.701	Dfa	41	1.036e+09	1.11	0.33	0.74
05517000	5517000	41.303	-86.621	Dfa	41	9.94555e+08	1.09	0.33	0.74
05517500	5517500	41.221	-86.964	Dfa	41	3.00439e+09	1.09	0.32	0.74
05518000	5518000	41.183	-87.343	Dfa	41	4.087e+09	1.09	0.32	0.74
05520500	5520500	41.16	-87.6686	Dfa	41	5.94143e+09	1.08	0.32	0.73
05526000	5526000	41.0089	-87.8242	Dfa	41	5.41567e+09	1.03	0.3	0.72
05542000	5542000	41.2861	-88.3597	Dfa	41	1.17844e+09	1	0.29	0.71
05546500	5546500	42.5111	-88.1792	Dfa	41	2.24811e+09	0.94	0.27	0.69
05552500	5552500	41.387	-88.791	Dfa	41	6.84275e+09	0.97	0.28	0.7
05554500	5554500	40.878	-88.636	Dfa	41	1.4996e+09	0.99	0.29	0.7
05555300	5555300	41.2083	-88.9308	Dfa	41	3.24008e+09	0.98	0.29	0.7
05555500	5555500	41.2553	-89.0122	Dfa	41	3.31e+09	0.98	0.29	0.7
05569500	5569500	40.7089	-90.2814	Dfa	41	2.77647e+09	0.92	0.26	0.68
05570000	5570000	40.4856	-90.3428	Dfa	41	4.23722e+09	0.93	0.27	0.68
05582000	5582000	40.134	-89.736	Dfa	41	4.67234e+09	0.95	0.28	0.69
05584500	5584500	40.329	-90.899	Dfa	41	1.69644e+09	0.97	0.28	0.7
05585000	5585000	40.0253	-90.6319	Dfa	41	3.34885e+09	0.99	0.29	0.7
05592500	5592500	38.9597	-89.0889	Cfa	31	5.02458e+09	0.99	0.29	0.7
05593000	5593000	38.6117	-89.3561	Cfa	31	7.04218e+09	0.99	0.29	0.7
05594000	5594000	38.61	-89.494	Cfa	31	1.90364e+09	0.98	0.29	0.7
06191500	6191500	45.1119	-110.794	Dfc	43	6.79354e+09	1.38	0.4	0.83
06192500	6192500	45.5972	-110.565	Dfb	42	9.19705e+09	1.31	0.38	0.81
06225500	6225500	43.242	-109.01	BSk	26	4.89767e+09	0.77	0.21	0.61
06334500	6334500	45.5469	-103.973	BSk	26	5.10228e+09	0.37	0.06	0.35
06340500	6340500	47.2853	-101.622	Dfb	42	5.80157e+09	0.42	0.08	0.39
06359500	6359500	45.1978	-102.156	BSk	26	6.88937e+09	0.39	0.07	0.36
06426500	6426500	44.2956	-104.976	BSk	26	4.25535e+09	0.34	0.05	0.32
06441500	6441500	44.3267	-100.384	Dwa	49	8.04709e+09	0.35	0.06	0.33
06446000	6446000	43.2547	-102.825	BSk	26	5.69797e+09	0.35	0.06	0.33
06454500	6454500	42.4597	-103.171	BSk	26	3.62598e+09	0.32	0.05	0.3
06480000	6480000	44.18	-96.7486	Dfa	41	1.00958e+10	0.51	0.11	0.46
06600500	6600500	42.5767	-96.3119	Dfb	42	2.29473e+09	0.64	0.16	0.54
06606600	6606600	42.4722	-95.7969	Dfa	41	6.47497e+09	0.69	0.18	0.57
06607200	6607200	42.158	-95.808	Dfa	41	1.7327e+09	0.7	0.18	0.57
06609500	6609500	41.642	-95.782	Dfa	41	2.25588e+09	0.74	0.2	0.59
06799500	6799500	41.714	-96.521	Dfa	41	2.66769e+09	0.6	0.14	0.51
06808500	6808500	40.8731	-95.58	Dfa	41	3.43432e+09	0.75	0.2	0.6
06810000	6810000	40.6325	-95.6256	Dfa	41	7.26751e+09	0.77	0.21	0.61
06811500	6811500	40.3925	-95.8128	Dfa	41	2.05386e+09	0.69	0.18	0.57
06813000	6813000	40.3389	-95.4089	Dfa	41	1.31571e+09	0.79	0.22	0.62
06815000	6815000	40.033	-95.592	Dfa	41	3.47058e+09	0.69	0.18	0.57
06817000	6817000	40.739	-95.013	Dfa	41	1.97357e+09	0.84	0.23	0.64
06817500	6817500	40.445	-95.0886	Dfa	41	3.21159e+09	0.84	0.23	0.64
06820500	6820500	39.689	-94.703	Dfa	41	4.55838e+09	0.84	0.23	0.64
06847000	6847000	40.12	-99.893	Dfa	41	4.27348e+09	0.34	0.05	0.33
06860000	6860000	38.792	-100.855	BSk	26	9.20741e+09	0.28	0.04	0.27
06868000	6868000	38.9333	-98.5333	Cfa	31	4.92098e+09	0.35	0.06	0.33
06869500	6869500	39.0042	-97.8739	Cfa	31	7.30377e+09	0.37	0.06	0.35
06883000	6883000	40.3328	-98.0667	Dfa	41	2.5356e+09	0.5	0.11	0.45
06884400	6884400	39.7758	-96.8581	Dfa	41	8.60912e+09	0.53	0.12	0.47
06884500	6884500	39.7778	-96.8611	Dfa	41	9.08827e+09	0.53	0.12	0.47
06885500	6885500	39.6842	-96.4375	Dfa	41	1.0619e+09	0.68	0.17	0.56
06888500	6888500	39.0622	-96.1811	Cfa	31	8.18436e+08	0.69	0.18	0.57
06890500	6890500	39.3508	-95.4544	Cfa	31	2.38797e+09	0.77	0.21	0.61
06892000	6892000	39.1164	-95.0108	Cfa	31	1.05154e+09	0.82	0.23	0.64
06894000	6894000	39.1006	-94.3003	Cfa	31	4.76558e+08	0.89	0.25	0.66
06897500	6897500	39.9269	-93.9425	Dfa	41	5.82747e+09	0.85	0.24	0.65
06898000	6898000	40.6403	-93.8081	Dfa	41	1.81558e+09	0.88	0.25	0.66
06899500	6899500	40.0794	-93.6442	Csb	35	4.32528e+09	0.87	0.25	0.66
06908000	6908000	38.9922	-93.1967	Cfa	31	2.90079e+09	0.93	0.27	0.68
06913500	6913500	38.6167	-95.2569	Cfa	31	3.23749e+09	0.73	0.19	0.59
06914000	6914000	38.3336	-95.2486	Cfa	31	8.65056e+08	0.79	0.21	0.62
06928000	6928000	37.7592	-92.4517	Cfa	31	3.23749e+09	1.08	0.32	0.73
06933500	6933500	37.9297	-91.9772	Cfa	31	7.35557e+09	1.09	0.32	0.74
07019000	7019000	38.5056	-90.5917	Cfa	31	9.81087e+09	1.1	0.33	0.74
07029500	7029500	35.2753	-88.9767	Cfa	31	3.83318e+09	1.34	0.4	0.8
07049000	7049000	36.2006	-93.8556	Cfa	31	6.81167e+08	1.16	0.35	0.76
07052500	7052500	36.805	-93.461	Cfa	31	2.55632e+09	1.06	0.31	0.73
07056000	7056000	35.9839	-92.7456	Cfa	31	2.1471e+09	1.28	0.38	0.79
07057500	7057500	36.6228	-92.2481	Cfa	31	1.45298e+09	1.13	0.34	0.75
07058000	7058000	36.626	-92.304	Cfa	31	1.47629e+09	1.13	0.34	0.75
07067000	7067000	36.9914	-91.0147	Cfa	31	4.31751e+09	1.15	0.34	0.75
07068000	7068000	36.6219	-90.8475	Cfa	31	5.2784e+09	1.16	0.35	0.76
07069500	7069500	36.2053	-91.1719	Cfa	31	3.06396e+09	1.18	0.35	0.76
07072000	7072000	36.3467	-91.1133	Cfa	31	2.93705e+09	1.17	0.35	0.76
07074000	7074000	36.1103	-91.4497	Cfa	31	1.22506e+09	1.23	0.37	0.78
07144200	7144200	37.8322	-97.3878	Cfa	31	3.43691e+09	0.51	0.11	0.45
07144780	7144780	37.8447	-97.9358	Cfa	31	2.03832e+09	0.42	0.08	0.39
07147070	7147070	37.7958	-97.0125	Cfa	31	1.10333e+09	0.6	0.14	0.52
07147800	7147800	37.2242	-96.9944	Cfa	31	4.86918e+09	0.6	0.14	0.52
07152000	7152000	36.811	-97.277	Cfa	31	4.81479e+09	0.47	0.1	0.43
07163000	7163000	36.116	-96.868	Cfa	31	8.02896e+07	0.65	0.16	0.54
07172000	7172000	37.0036	-96.315	Cfa	31	1.15254e+09	0.67	0.17	0.55
07177500	7177500	36.278	-95.954	Cfa	31	2.34394e+09	0.71	0.18	0.58
07183000	7183000	37.8908	-95.4306	Cfa	31	9.88857e+09	0.64	0.16	0.54
07186000	7186000	37.2456	-94.5661	Cfa	31	3.01475e+09	0.96	0.28	0.69
07196500	7196500	35.9214	-94.9208	Cfa	31	2.4838e+09	0.98	0.29	0.7
07197000	7197000	35.9211	-94.8383	Cfa	31	7.95126e+08	1.01	0.3	0.71
07211500	7211500	36.2969	-104.493	BSk	26	7.38147e+09	0.44	0.09	0.4
07221000	7221000	35.8003	-104.783	BSk	26	2.85935e+09	0.5	0.11	0.45
07222500	7222500	35.4028	-104.443	BSk	26	1.35456e+09	0.27	0.03	0.26
07243500	7243500	35.675	-96.065	Cfa	31	5.2266e+09	0.64	0.16	0.54
07252000	7252000	35.5769	-94.0153	Cfa	31	9.66066e+08	1.21	0.36	0.77
07261000	7261000	35.2989	-92.4028	Cfb	32	4.37708e+08	1.36	0.41	0.81
07288500	7288500	33.547	-90.543	Cfa	31	1.98652e+09	1.22	0.36	0.77
07289500	7289500	32.8806	-89.9661	Cfa	31	3.86685e+09	1.32	0.4	0.8
07290000	7290000	32.3475	-90.6967	Cfa	31	7.28305e+09	1.32	0.4	0.8
07307800	7307800	34.2275	-100.073	BSk	26	7.13283e+09	0.29	0.04	0.28
07340000	7340000	33.9194	-94.3875	Cfa	31	6.89455e+09	1.01	0.29	0.71
07346000	7346000	32.7494	-94.4986	Cfa	31	2.20149e+09	0.86	0.24	0.65
07346050	7346050	32.6725	-94.7508	Cfa	31	9.91965e+08	0.84	0.23	0.64
07346070	7346070	32.7139	-94.3456	Cfa	31	1.74824e+09	0.85	0.24	0.65
07348000	7348000	32.6458	-93.8778	Cfa	31	8.12479e+09	0.89	0.25	0.67
07363500	7363500	33.7008	-92.0258	Cfa	31	5.44416e+09	1.45	0.43	0.82
07375500	7375500	30.5064	-90.3617	Cfa	31	1.67313e+09	1.54	0.45	0.84
07378000	7378000	30.512	-91.074	Cfa	31	7.35557e+08	1.46	0.43	0.83
07378500	7378500	30.4639	-90.9903	Cfa	31	3.31518e+09	1.46	0.44	0.83
08013500	8013500	30.6403	-92.8139	Cfa	31	1.95026e+09	1.3	0.39	0.79
08015500	8015500	30.5028	-92.9153	Cfa	31	4.40298e+09	1.29	0.39	0.79
08032000	8032000	31.8922	-95.4306	Cfa	31	2.96554e+09	0.73	0.19	0.59
08033500	8033500	31.0247	-94.3986	Cfa	31	9.4172e+09	0.78	0.21	0.62
08055500	8055500	32.9658	-96.9442	Cfa	31	6.36878e+09	0.58	0.13	0.5
08085500	8085500	32.9344	-99.2242	Cfa	31	1.03289e+10	0.35	0.06	0.33
08095000	8095000	31.7858	-97.5678	Cfa	31	2.50711e+09	0.49	0.1	0.44
08103800	8103800	31.0817	-98.0164	Cfa	31	2.11861e+09	0.46	0.09	0.42
08146000	8146000	31.2131	-98.7192	Cfa	31	7.8891e+09	0.35	0.06	0.33
08150000	8150000	30.4975	-99.7219	Cfa	31	4.80702e+09	0.34	0.05	0.32
08150700	8150700	30.6606	-99.1089	Cfa	31	8.40969e+09	0.36	0.06	0.34
08167500	8167500	29.8606	-98.3828	Cfa	31	3.40583e+09	0.45	0.09	0.41
08171000	8171000	29.9942	-98.0886	Cfa	31	9.19446e+08	0.53	0.12	0.47
08171300	8171300	29.9792	-97.9097	Cfa	31	1.06708e+09	0.54	0.12	0.47
08172000	8172000	29.665	-97.6497	Cfa	31	2.17041e+09	0.56	0.13	0.49
08189500	8189500	28.2917	-97.2789	Cfa	31	1.78709e+09	0.54	0.12	0.48
08205500	8205500	28.7364	-99.1444	Cfa	31	8.88107e+09	0.37	0.06	0.35
08340500	8340500	35.593	-107.189	BSk	26	3.60008e+09	0.22	0.02	0.21
09127998	9127998	38.5261	-107.649	Dfb	42	1.02693e+10	0.66	0.17	0.55
09132500	9132500	38.9258	-107.434	Dfb	42	1.36233e+09	0.55	0.13	0.48
09251000	9251000	40.5028	-108.029	Dfb	42	8.83186e+09	0.51	0.11	0.45
09292500	9292500	40.512	-110.341	Dfa	41	3.41878e+08	0.88	0.25	0.66
09299500	9299500	40.5869	-109.927	BSk	26	2.92669e+08	0.84	0.23	0.64
09430500	9430500	33.0611	-108.537	BSk	26	4.82774e+09	0.45	0.09	0.41
09431500	9431500	32.7269	-108.675	BSk	26	7.32708e+09	0.35	0.06	0.33
09442692	9442692	33.8914	-108.515	BSk	26	2.43459e+08	0.47	0.1	0.43
09444500	9444500	33.0494	-109.295	BSk	26	7.16391e+09	0.43	0.08	0.39
09497500	9497500	33.798	-110.499	Csa	34	7.37888e+09	0.43	0.08	0.39
10296000	10296000	38.3797	-119.449	Csb	35	4.66198e+08	1.15	0.34	0.76
10296500	10296500	38.5153	-119.454	Csb	35	6.47497e+08	1.14	0.34	0.76
10301500	10301500	39.1528	-119.097	BWk	21	6.73397e+09	0.86	0.24	0.65
10309000	10309000	38.847	-119.703	Csb	35	9.22036e+08	1.27	0.38	0.79
10312000	10312000	39.2917	-119.311	BWk	21	3.37216e+09	1.02	0.29	0.72
11025500	11025500	33.1069	-116.865	Csa	34	2.90079e+08	0.28	0.04	0.27
11080500	11080500	34.236	-117.805	Csb	35	2.20149e+08	0.57	0.13	0.49
11138500	11138500	34.8397	-120.167	Csb	35	7.27787e+08	0.34	0.05	0.32
11160000	11160000	36.9914	-121.955	Csb	35	1.036e+08	-1	-1	0.32
11210500	11210500	36.4067	-118.953	Csb	35	1.3442e+09	0.39	0.08	0.36
11213500	11213500	36.8633	-119.123	Csa	34	2.46567e+09	0.7	0.18	0.57
11222000	11222000	36.8167	-119.335	Csa	34	4.38485e+09	0.49	0.11	0.43
11224500	11224500	36.2147	-120.47	BSk	26	2.48639e+08	0.29	0.04	0.27
11281000	11281000	37.8217	-120.012	Csb	35	2.25329e+08	0.7	0.18	0.57
11342000	11342000	40.9397	-122.416	Csb	35	1.10074e+09	1.28	0.38	0.8
11355500	11355500	40.6867	-121.424	Csb	35	4.19578e+08	0.96	0.28	0.69
11401500	11401500	40.0781	-120.927	Dfa	41	1.914e+09	0.9	0.25	0.67
11403000	11403000	40.0106	-121.218	Csb	35	2.65474e+09	0.98	0.28	0.7
11413000	11413000	39.525	-120.937	Cfa	31	6.47497e+08	1.41	0.42	0.82
11427000	11427000	38.9361	-121.023	Csa	34	8.85776e+08	0.86	0.24	0.65
11497500	11497500	42.4472	-121.237	Csb	35	1.32866e+09	0.53	0.12	0.46
11501000	11501000	42.5847	-121.849	Csb	35	4.09218e+09	0.86	0.22	0.67
11530000	11530000	41.05	-123.671	Csb	35	7.38924e+09	1.61	0.46	0.87
11532500	11532500	41.7894	-124.054	Csb	35	1.5773e+09	3.63	0.73	0.98
12027500	12027500	46.7761	-123.034	Csb	35	2.31804e+09	4.32	0.76	1.06
12098500	12098500	47.151	-121.949	Csb	35	1.03859e+09	2.52	0.62	0.96
12134500	12134500	47.8375	-121.666	Cfb	32	1.38564e+09	2.67	0.63	0.99
12144500	12144500	47.5453	-121.841	Csb	35	9.71246e+08	2.48	0.6	0.98
12149000	12149000	47.666	-121.924	Csb	35	1.56176e+09	2.11	0.55	0.95
12340000	12340000	46.9	-113.756	Dfb	42	5.93107e+09	0.87	0.23	0.66
12358500	12358500	48.4953	-114.009	Dfc	43	2.92151e+09	1.14	0.31	0.79
12413000	12413000	47.5722	-116.253	Dsb	46	2.31804e+09	1.18	0.34	0.77
12413500	12413500	47.5639	-116.307	Dsb	46	3.15979e+09	1.13	0.33	0.76
12449500	12449500	48.3653	-120.115	Dsb	46	3.36957e+09	2.78	0.63	1.04
12449950	12449950	48.0775	-119.984	Dsb	46	4.58946e+09	2.65	0.61	1.04
12459000	12459000	47.5833	-120.613	Dsb	46	2.58999e+09	3.93	0.75	1
12462500	12462500	47.4994	-120.423	Csb	35	3.36957e+09	3.66	0.72	1.02
13186000	13186000	43.4944	-115.306	Dsb	46	1.64464e+09	1.03	0.29	0.73
13200000	13200000	43.6481	-115.989	Dsb	46	1.03341e+09	0.5	0.11	0.45
13298500	13298500	44.3786	-114.255	Dfb	42	4.66198e+09	1.3	0.38	0.8
13302500	13302500	45.1833	-113.894	Dfb	42	9.73836e+09	1.16	0.34	0.77
13336500	13336500	46.0867	-115.513	Csb	35	4.94688e+09	1.3	0.38	0.8
13337000	13337000	46.1506	-115.586	Csb	35	3.05619e+09	1.55	0.44	0.86
13340500	13340500	46.6314	-115.508	Dsb	46	2.57963e+09	1.47	0.43	0.84
13340600	13340600	46.8406	-115.62	Dsb	46	3.52238e+09	1.43	0.42	0.83
13351000	13351000	46.7586	-118.148	BSk	26	6.47497e+09	0.34	0.06	0.32
14080500	14080500	44.1139	-120.794	Csb	35	6.99297e+09	0.31	0.05	0.3
14101500	14101500	45.2417	-121.094	Csb	35	1.08003e+09	2.52	0.61	0.98
14113000	14113000	45.7567	-121.209	Csb	35	3.35921e+09	2.42	0.56	1.05
14232500	14232500	46.4417	-121.863	Csb	35	8.31386e+08	3.46	0.71	0.99
14233400	14233400	46.4703	-122.097	Csb	35	2.66769e+09	3.31	0.7	1
14308000	14308000	42.9306	-122.947	Dfb	42	1.1629e+09	1.7	0.49	0.87
14321000	14321000	43.5861	-123.554	Csb	35	9.53893e+09	2.16	0.56	0.95
14359000	14359000	42.4375	-122.986	Csb	35	5.31725e+09	1.15	0.33	0.77
