# Supplementary material for: Data compression to define information content of hydrological time series
Source: Copernicus journal article supplement (doi:10.5194/hess-17-3171-2013), 2013-08-06
Supplement: Supplementary file 3 [file results_P_6bits.xls]

## Sheet: Sheet1
gauge nr	H	Cbest	C/H	WAVPACK	ARJ	PPMD	LZMA	BZIP2	PNG	GIF	TIFF
01048000	1.5247	0.313981	1.23558	0.869116	0.449388	0.390924	0.313981	0.326481	0.339836	0.44372	0.38083
01055500	1.79486	0.359988	1.2034	0.960358	0.508282	0.439381	0.359988	0.374003	0.392273	0.504467	0.40871
01060000	1.54031	0.314082	1.22345	0.874746	0.448944	0.383993	0.314082	0.326618	0.339222	0.44247	0.382891
01064500	1.96163	0.38523	1.1783	0.989047	0.542069	0.473652	0.38523	0.407369	0.427107	0.54507	0.436976
01076500	2.01744	0.397612	1.18252	1.01871	0.560526	0.486407	0.397612	0.40535	0.441509	0.561993	0.447914
01127000	1.69556	0.343652	1.21606	0.946009	0.491674	0.414729	0.343652	0.355253	0.373723	0.480672	0.391725
01138000	2.1934	0.437458	1.19666	1.04705	0.599331	0.561427	0.437458	0.445039	0.486622	0.60825	0.490858
01197500	1.89093	0.374856	1.18943	0.992282	0.53228	0.460069	0.374856	0.386925	0.414195	0.528413	0.421063
01200000	1.67683	0.339966	1.21646	0.923406	0.483169	0.415847	0.339966	0.354657	0.369206	0.478177	0.403437
01321000	2.14569	0.418996	1.17164	1.03456	0.583754	0.514877	0.418996	0.439799	0.464936	0.592289	0.465737
01329000	2.07221	0.399094	1.15556	1.04532	0.578852	0.526788	0.414099	0.399094	0.4572	0.579053	0.481571
01329500	1.86082	0.389984	1.25746	0.976201	0.52869	0.529858	0.389984	0.409111	0.42415	0.539787	0.472332
01334500	1.89569	0.372381	1.17861	0.985702	0.532986	0.460208	0.377665	0.372381	0.415994	0.53245	0.426562
01348000	2.52889	0.465821	1.1052	1.10038	0.657975	0.60304	0.484518	0.465821	0.54262	0.676595	0.544011
01361000	1.76574	0.381581	1.29661	0.960197	0.511765	0.535515	0.381581	0.401988	0.412016	0.522145	0.435414
01371500	1.57842	0.319848	1.21583	0.8916	0.458069	0.388592	0.319848	0.33305	0.344385	0.450334	0.370656
01372500	1.64348	0.333717	1.21833	0.910403	0.474138	0.401594	0.333717	0.345585	0.361854	0.46607	0.382124
01421000	1.80464	0.360839	1.19971	0.939962	0.505569	0.439758	0.360839	0.377954	0.395341	0.510187	0.409535
01423000	1.82866	0.36273	1.19015	0.942944	0.50924	0.444093	0.36273	0.379438	0.398603	0.512259	0.429983
01426500	1.91111	0.376323	1.18148	0.967879	0.528279	0.459736	0.376323	0.390259	0.414129	0.533947	0.428931
01445000	1.90675	0.417796	1.31468	1.03607	0.551699	0.633872	0.417796	0.440567	0.45616	0.563331	0.496009
01445500	1.53175	0.31358	1.22832	0.8868	0.451801	0.382724	0.31358	0.325515	0.338051	0.4436	0.362854
01500500	2.00131	0.395673	1.18624	0.988844	0.550204	0.48613	0.395673	0.406528	0.437208	0.557742	0.456958
01503000	1.90938	0.37619	1.18213	0.962811	0.526012	0.461669	0.37619	0.394259	0.415129	0.531346	0.429198
01512500	2.03359	0.399727	1.17937	0.992282	0.553883	0.488273	0.399727	0.42073	0.442333	0.564751	0.447801
01514000	2.07155	0.418959	1.21347	1.03452	0.574956	0.545158	0.418959	0.425845	0.463242	0.580773	0.476419
01518000	1.61277	0.324249	1.2063	0.882932	0.461336	0.394059	0.324249	0.338584	0.352186	0.461869	0.377857
01520000	1.61238	0.324744	1.20844	0.880681	0.460955	0.398325	0.324744	0.340849	0.352659	0.461026	0.396536
01520500	1.49644	0.306575	1.22922	0.853422	0.437525	0.384876	0.306575	0.32173	0.331755	0.43563	0.3713
01531000	1.63837	0.328649	1.20357	0.883733	0.464403	0.397393	0.328649	0.343518	0.358187	0.467603	0.383458
01534000	1.71141	0.342051	1.19919	0.918138	0.485339	0.413262	0.342051	0.35832	0.372856	0.486806	0.396326
01541000	2.09658	0.409195	1.17103	1.01429	0.564885	0.502075	0.409195	0.419463	0.451934	0.577353	0.458735
01541500	1.86053	0.368189	1.18736	0.950143	0.513144	0.449001	0.368189	0.385391	0.406194	0.522745	0.419796
01543500	1.89532	0.373256	1.18161	0.959611	0.523679	0.458335	0.373256	0.394726	0.412795	0.531813	0.424664
01548500	1.64755	0.331316	1.20658	0.893334	0.469737	0.40046	0.331316	0.345185	0.360054	0.471271	0.383924
01556000	1.73333	0.347519	1.20295	0.930406	0.489073	0.421063	0.347519	0.362321	0.37699	0.490274	0.396659
01558000	1.71079	0.343185	1.2036	0.921872	0.484273	0.413929	0.343185	0.358854	0.374389	0.485606	0.395793
01559000	1.75514	0.349786	1.19575	0.930673	0.491607	0.42493	0.349786	0.365922	0.380057	0.494207	0.402727
01560000	1.73101	0.344718	1.19486	0.909203	0.482006	0.415329	0.344718	0.361388	0.375923	0.486206	0.39866
01562000	1.66608	0.332717	1.1982	0.8908	0.468604	0.404394	0.332717	0.348119	0.362454	0.473004	0.389725
01567000	1.81018	0.35872	1.18901	0.935607	0.499075	0.437599	0.35872	0.376056	0.390592	0.506676	0.412395
01574000	1.47103	0.300578	1.22599	0.851728	0.432998	0.368322	0.300578	0.313247	0.323649	0.426664	0.352853
01595000	2.05415	0.403244	1.17784	0.987391	0.55376	0.494958	0.403244	0.426449	0.447128	0.572229	0.466308
01606500	1.65693	0.331413	1.2001	0.86822	0.462276	0.399716	0.331413	0.347399	0.360893	0.471687	0.387675
01608500	1.6055	0.321102	1.2	0.85521	0.449473	0.390097	0.321102	0.336119	0.348022	0.458746	0.378402
01610000	1.67785	0.332917	1.19051	0.871331	0.464136	0.40166	0.332917	0.350653	0.363254	0.476271	0.390525
01611500	1.54584	0.313634	1.21733	0.845811	0.440612	0.382414	0.313634	0.326402	0.337266	0.439342	0.370421
01628500	1.50619	0.303112	1.20747	0.842526	0.427597	0.369922	0.303112	0.315581	0.325315	0.432198	0.363655
01631000	1.51157	0.304779	1.20979	0.838659	0.428064	0.369722	0.304779	0.316848	0.328383	0.433398	0.362254
01634000	1.45574	0.293844	1.21111	0.831325	0.421463	0.359721	0.293844	0.306846	0.317314	0.419596	0.350119
01643000	1.44054	0.294911	1.22833	0.842793	0.425731	0.359921	0.294911	0.305179	0.316781	0.418729	0.345452
01649500	1.52002	0.312151	1.23216	0.883713	0.448616	0.378208	0.312151	0.321588	0.334036	0.440183	0.366228
01663500	1.45779	0.299729	1.23363	0.842208	0.425017	0.378554	0.299729	0.312608	0.320515	0.42575	0.353447
01664000	1.41593	0.288643	1.22312	0.832392	0.416062	0.352986	0.288643	0.301045	0.309046	0.410462	0.339851
01667500	1.39805	0.28749	1.23382	0.826813	0.412524	0.352282	0.28749	0.297541	0.305623	0.407838	0.339989
01668000	1.38728	0.284109	1.22878	0.816923	0.410728	0.347986	0.284109	0.294511	0.303912	0.406061	0.336851
01672500	1.46294	0.299288	1.22748	0.842322	0.427177	0.370533	0.299288	0.309194	0.322107	0.424536	0.354098
01674500	1.54669	0.313486	1.21609	0.869358	0.443247	0.382857	0.313486	0.324679	0.33608	0.442901	0.367242
02016000	1.59602	0.320448	1.20468	0.861863	0.448067	0.387992	0.320448	0.33285	0.343918	0.455202	0.376056
02018000	1.68735	0.336717	1.19733	0.899735	0.468004	0.405794	0.336717	0.350853	0.364855	0.477072	0.391859
02030500	1.34356	0.280034	1.25056	0.815659	0.402941	0.351227	0.280034	0.291187	0.296534	0.39599	0.330832
02055000	1.66934	0.333917	1.20018	0.905736	0.46567	0.404594	0.333917	0.347786	0.361254	0.472404	0.388792
02058400	1.59822	0.324911	1.21977	0.885177	0.451034	0.41651	0.324911	0.339667	0.349505	0.456602	0.39535
02083500	1.48187	0.30129	1.21991	0.837318	0.426861	0.366177	0.30129	0.312294	0.320763	0.429596	0.354706
02102000	1.52781	0.30918	1.2142	0.854662	0.434865	0.375323	0.30918	0.320981	0.331183	0.434599	0.366522
02116500	2.05913	0.396526	1.15542	1.00082	0.536881	0.48774	0.396526	0.412462	0.432998	0.55775	0.461869
02118000	1.772	0.350119	1.18551	0.929206	0.485139	0.426864	0.350119	0.364921	0.378123	0.493874	0.406794
02121000	0	0		0	0	0	0	0	0	0	0
02126000	1.66029	0.33225	1.20069	0.898268	0.462736	0.40126	0.33225	0.344452	0.358054	0.46827	0.386658
02135000	1.53429	0.306914	1.20022	0.839989	0.431337	0.375374	0.306914	0.321855	0.330617	0.434393	0.362062
02138500	1.90446	0.372456	1.17342	0.944008	0.503676	0.454401	0.372456	0.388525	0.407461	0.524679	0.435065
02143000	1.65811	0.327849	1.18634	0.889333	0.456669	0.397793	0.327849	0.340851	0.355253	0.463336	0.390659
02143040	1.59197	0.324452	1.22283	0.879154	0.449015	0.413311	0.324452	0.338075	0.347869	0.454268	0.403517
02143500	1.76515	0.35052	1.19146	0.943438	0.488941	0.428342	0.35052	0.365741	0.378747	0.493801	0.421124
02156500	1.89163	0.367814	1.16666	0.942683	0.49923	0.452311	0.367814	0.3829	0.399924	0.521237	0.435425
02165000	1.60154	0.320497	1.20071	0.879924	0.451711	0.392285	0.320497	0.334148	0.345898	0.455243	0.380128
02174000	0	0		0	0	0	0	0	0	0	0
02192000	1.82135	0.357387	1.17733	0.938407	0.48974	0.436665	0.357387	0.371922	0.387858	0.503209	0.420263
02202000	0	0		0	0	0	0	0	0	0	0
02202500	1.96233	0.37659	1.15146	0.95761	0.507876	0.46427	0.37659	0.393792	0.410728	0.53008	0.449067
02217500	1.8944	0.371656	1.17712	0.974546	0.512077	0.456869	0.371656	0.386925	0.406394	0.522545	0.437199
02218500	1.8973	0.383581	1.21303	0.985843	0.51904	0.504081	0.383581	0.40222	0.419078	0.532692	0.452438
02219500	1.81689	0.37349	1.23339	0.968985	0.504081	0.489953	0.37349	0.389398	0.402457	0.51441	0.433087
02228000	1.97053	0.375723	1.14403	0.944275	0.502875	0.461803	0.375723	0.388725	0.408128	0.531613	0.450134
02236000	1.98468	0.363265	1.09821	0.886536	0.47884	0.447143	0.363265	0.376553	0.390879	0.518634	0.45441
02273000	2.01516	0.365757	1.08901	0.891934	0.480986	0.44915	0.365757	0.37766	0.392886	0.522717	0.451573
02296750	1.82277	0.340651	1.12132	0.884133	0.463403	0.414662	0.340651	0.35252	0.368655	0.487873	0.409795
02329000	1.62174	0.320981	1.18754	0.869197	0.444067	0.390392	0.320981	0.33265	0.346852	0.454001	0.381257
02339500	2.16469	0.408661	1.13271	1.00748	0.551749	0.507143	0.410862	0.408661	0.450734	0.580354	0.487273
02347500	1.83543	0.359454	1.17505	0.938141	0.490674	0.439866	0.359454	0.373256	0.390392	0.50921	0.42313
02349500	1.75326	0.343251	1.17467	0.898535	0.470537	0.415062	0.343251	0.356653	0.372523	0.484673	0.406528
02365500	1.66643	0.327654	1.17972	0.870487	0.45142	0.398692	0.327654	0.340871	0.355188	0.465462	0.409086
02375500	1.68429	0.33105	1.17931	0.871464	0.454335	0.400993	0.33105	0.343452	0.358254	0.470471	0.399393
02383500	2.09861	0.407179	1.16414	1.03116	0.555108	0.501588	0.407179	0.424295	0.445961	0.570866	0.473537
02387000	1.9573	0.384258	1.17792	0.998683	0.532213	0.471071	0.384258	0.40026	0.418396	0.539548	0.4434
02387500	2.04816	0.398793	1.16825	1.00948	0.544415	0.488607	0.398793	0.414462	0.436599	0.560017	0.458469
02414500	1.96085	0.379381	1.16086	0.970796	0.517522	0.469234	0.379381	0.396971	0.414901	0.53586	0.446074
02437000	2.49595	1.10734	2.66194	1.9661	1.10734	5.33898	1.36158	1.44633	1.53672	1.31073	1.34463
02448000	1.21257	0.25289	1.25134	0.779849	0.375025	0.313957	0.25289	0.262244	0.269192	0.360326	0.305472
02456500	1.69345	0.338563	1.19955	0.91755	0.475482	0.411573	0.338563	0.353029	0.367427	0.481187	0.391945
02472000	1.54007	0.31038	1.20921	0.864263	0.437266	0.37739	0.31038	0.319515	0.332917	0.437932	0.365988
02475000	1.86875	0.364255	1.16951	0.941341	0.498008	0.4464	0.364255	0.378323	0.396459	0.515211	0.431798
02475500	1.61777	0.325049	1.20554	0.894001	0.458735	0.395059	0.325049	0.337717	0.351586	0.459736	0.38079
02478500	1.75753	0.345452	1.17933	0.917604	0.479539	0.422797	0.345452	0.360121	0.376123	0.490807	0.407061
02479300	1.69889	0.33996	1.20064	0.906835	0.469767	0.42559	0.33996	0.354493	0.369604	0.480172	0.416589
02482000	1.34228	0.276849	1.23752	0.813933	0.401628	0.340173	0.276849	0.286124	0.297134	0.391152	0.32923
02486000	1.62108	0.324411	1.20072	0.877585	0.453013	0.395583	0.324411	0.336239	0.351143	0.462312	0.392507
02492000	1.60298	0.32124	1.20241	0.874587	0.447536	0.392658	0.32124	0.332174	0.346914	0.453141	0.382
03010500	1.98047	0.387591	1.17424	0.972813	0.538814	0.474605	0.387591	0.397926	0.430198	0.549882	0.439999
03011020	1.97253	0.385058	1.17126	0.956944	0.53428	0.471004	0.385058	0.407061	0.425997	0.548216	0.440933
03020500	1.95019	0.381857	1.17483	0.954276	0.528479	0.46667	0.381857	0.401927	0.421597	0.544682	0.433732
03024000	1.92704	0.37599	1.17068	0.939341	0.521212	0.461269	0.37599	0.397393	0.415596	0.537014	0.429931
03032500	2.1407	0.417929	1.17138	1.03029	0.58022	0.513544	0.417929	0.426064	0.465203	0.589222	0.466137
03050500	1.9816	0.386193	1.16933	0.951916	0.531395	0.472982	0.386193	0.407094	0.425919	0.549875	0.443706
03051000	2.0835	0.406567	1.17082	0.972855	0.552932	0.493971	0.406567	0.415633	0.447951	0.577499	0.458746
03054500	2.10475	0.406913	1.15998	0.975762	0.555769	0.497085	0.406913	0.432795	0.451549	0.575976	0.46276
03065000	1.78759	0.354285	1.18915	0.902445	0.492737	0.427359	0.354285	0.372783	0.387539	0.508834	0.410555
03069000	2.03073	0.397584	1.1747	0.961481	0.543893	0.484898	0.397584	0.421511	0.43877	0.562407	0.458539
03069500	2.00766	0.392104	1.17183	0.955831	0.537361	0.479023	0.392104	0.413003	0.433003	0.557222	0.444906
03070000	2.05126	0.401138	1.17334	0.962522	0.546408	0.492568	0.401138	0.423752	0.442398	0.568947	0.454379
03075500	1.9571	0.383791	1.17661	0.955343	0.53008	0.46827	0.383791	0.403594	0.423597	0.543882	0.435199
03079000	1.7238	0.341451	1.18848	0.895868	0.479272	0.413262	0.341451	0.359854	0.374389	0.487406	0.39766
03109500	1.90933	0.376123	1.18195	0.962678	0.523012	0.460602	0.376123	0.393592	0.414596	0.533213	0.430598
03111500	2.03409	0.396659	1.17003	1.01415	0.553883	0.48834	0.396659	0.416596	0.438532	0.562884	0.450134
03114500	2.1932	0.425994	1.1654	1.03257	0.58578	0.527829	0.425994	0.451988	0.472171	0.60107	0.482722
03136000	1.837	0.372071	1.21525	0.967874	0.515823	0.484257	0.372071	0.392013	0.407262	0.522648	0.443947
03155500	2.16606	0.424012	1.17452	1.03325	0.581981	0.524197	0.424012	0.445798	0.466179	0.594241	0.479922
03159500	1.92891	0.379057	1.17908	0.982814	0.528146	0.466937	0.379057	0.395326	0.418596	0.536947	0.433198
03161000	1.80376	0.356005	1.18421	0.921384	0.48483	0.429419	0.356005	0.369741	0.385344	0.498566	0.416817
03164000	1.97552	0.384258	1.16706	0.959611	0.517411	0.469337	0.384258	0.39966	0.41913	0.539148	0.446
03165500	2.04471	0.403062	1.18274	0.97991	0.53345	0.506144	0.403062	0.420714	0.438073	0.559391	0.474839
03167000	2.09747	0.408861	1.16958	1.01482	0.555217	0.499808	0.408861	0.426464	0.447667	0.572419	0.462136
03168000	2.13503	0.410995	1.15501	1.00255	0.549616	0.504542	0.410995	0.429198	0.449267	0.577687	0.474538
03173000	2.04204	0.397726	1.16861	0.995083	0.542481	0.488007	0.397726	0.402994	0.435199	0.558884	0.454135
03175500	2.16561	0.417299	1.15616	1.01798	0.56584	0.515443	0.417299	0.438558	0.459409	0.590155	0.479174
03179000	2.07081	0.404481	1.17195	0.994471	0.551142	0.499418	0.404481	0.42325	0.444929	0.570493	0.469591
03180500	1.79847	0.356715	1.19006	0.909436	0.495695	0.431993	0.356715	0.374043	0.391514	0.50727	0.421696
03182500	1.7512	0.346294	1.18648	0.900933	0.484314	0.421464	0.346294	0.365467	0.37938	0.494558	0.407136
03183500	1.85824	0.363731	1.17444	0.926904	0.502137	0.442414	0.363731	0.382762	0.397571	0.516738	0.42193
03184000	1.92813	0.376049	1.1702	0.941575	0.515354	0.460822	0.376049	0.394457	0.411619	0.533901	0.434595
03186500	1.96925	0.384838	1.17254	0.954309	0.528503	0.471618	0.384838	0.405599	0.423038	0.54788	0.437709
03198500	2.34985	0.434871	1.11038	1.07168	0.617636	0.557776	0.449196	0.434871	0.498538	0.635283	0.503382
03199000	2.35068	0.45653	1.16527	1.07755	0.618044	0.577616	0.45653	0.482654	0.506494	0.637811	0.51603
03213000	2.02177	0.399603	1.1859	0.976654	0.540173	0.509244	0.399603	0.423494	0.44005	0.563569	0.460669
03214000	2.18799	0.426554	1.16972	1.01615	0.576443	0.538439	0.426554	0.452567	0.469877	0.600329	0.491635
03237500	1.5719	0.317914	1.21349	0.871597	0.450201	0.384124	0.317914	0.330316	0.342785	0.450468	0.370722
03238500	1.69963	0.339584	1.1988	0.912804	0.478738	0.410728	0.339584	0.354987	0.369055	0.481606	0.392926
03251500	2.20034	0.424637	1.15792	1.0366	0.5797	0.52994	0.424637	0.447691	0.46968	0.599254	0.499962
03252500	1.97462	0.392465	1.19253	1.00217	0.540595	0.480703	0.392465	0.408629	0.429165	0.548404	0.445798
03253500	2.00558	0.390247	1.16748	0.981527	0.535045	0.479218	0.390247	0.410147	0.42862	0.551888	0.446686
03265000	1.90768	0.37759	1.18759	0.996816	0.528813	0.462003	0.37759	0.394192	0.415996	0.529546	0.427864
03266000	1.94767	0.384124	1.18334	1.00468	0.538414	0.472804	0.384124	0.400193	0.423063	0.539614	0.434865
03269500	1.71436	0.342385	1.1983	0.927606	0.484873	0.415529	0.342385	0.357854	0.374723	0.485273	0.393126
03274000	1.88472	0.370722	1.18019	0.968679	0.519211	0.455068	0.370722	0.388725	0.409195	0.525345	0.424397
03281500	2.17866	0.41918	1.15442	1.03722	0.5779	0.520375	0.41918	0.44003	0.464276	0.591483	0.47718
03289500	1.52962	0.313119	1.22822	0.866288	0.442232	0.383807	0.313119	0.32466	0.336056	0.440501	0.365269
03301500	1.67675	0.335371	1.20007	0.899891	0.471	0.407294	0.335371	0.348479	0.364439	0.474939	0.389636
03303000	1.59242	0.320581	1.20791	0.887733	0.455468	0.389392	0.320581	0.331983	0.346052	0.454668	0.374123
03308500	1.97317	0.385737	1.17295	0.985865	0.531479	0.473625	0.385737	0.404145	0.423107	0.545665	0.443937
03324300	1.93788	0.383664	1.18788	0.995876	0.535816	0.475195	0.383664	0.401522	0.420741	0.540541	0.444444
03326500	1.98619	0.389792	1.17751	1.00642	0.541681	0.479405	0.389792	0.405527	0.427998	0.544548	0.445133
03328500	2.07627	0.403394	1.16573	1.03442	0.561484	0.498341	0.403394	0.42353	0.444267	0.567618	0.458202
03331500	1.82264	0.35792	1.17825	0.960011	0.505609	0.441466	0.35792	0.371922	0.393059	0.50861	0.414195
03339500	1.82258	0.361854	1.19124	0.967879	0.508743	0.444867	0.361854	0.377057	0.395659	0.509476	0.416196
03345500	2.06617	0.400842	1.16401	1.03219	0.555012	0.4964	0.400842	0.416802	0.441592	0.560921	0.461152
03346000	1.85991	0.366612	1.18268	0.979353	0.512972	0.452391	0.366612	0.383252	0.400706	0.51596	0.42176
03348000	1.99305	0.394893	1.18881	1.01305	0.54626	0.486336	0.394893	0.412687	0.433992	0.550728	0.450429
03349000	1.91328	0.37579	1.17846	0.97988	0.522212	0.462069	0.37579	0.391925	0.412462	0.532813	0.429731
03361500	1.98424	0.386858	1.16979	1.00882	0.539214	0.477672	0.386858	0.396459	0.42473	0.545415	0.443333
03361650	1.84558	0.374739	1.21828	0.980809	0.519086	0.484043	0.374739	0.391948	0.410305	0.523675	0.454109
03362500	2.0043	0.392059	1.17365	1.01349	0.544482	0.482939	0.392059	0.408528	0.429198	0.55395	0.445934
03363000	2.00763	0.394601	1.17931	1.01366	0.545216	0.489976	0.394601	0.41396	0.432651	0.553476	0.454096
03364000	1.97146	0.385813	1.17419	0.998024	0.536991	0.475301	0.385813	0.403429	0.425198	0.542416	0.448843
03365500	2.03917	0.395859	1.16477	1.01762	0.550083	0.490407	0.395859	0.415729	0.435332	0.558617	0.451934
03381500	1.86655	0.364982	1.17323	0.971068	0.510799	0.451508	0.364982	0.382641	0.398193	0.514262	0.426107
03410500	2.15665	0.416395	1.15845	1.03124	0.57301	0.514806	0.416395	0.436838	0.460269	0.585914	0.471475
03438000	1.61391	0.327696	1.21827	0.901929	0.46251	0.39636	0.327696	0.33802	0.352418	0.460609	0.381282
03443000	1.85906	0.363321	1.17259	0.936407	0.496341	0.445067	0.363321	0.379657	0.395526	0.513677	0.424797
03448000	1.95246	0.385258	1.18392	0.959775	0.515175	0.487188	0.385258	0.402106	0.42092	0.538294	0.471838
03451500	1.95556	0.37959	1.16465	0.95641	0.51421	0.46367	0.37959	0.394326	0.412862	0.535414	0.443266
03455000	2.11528	0.405554	1.15036	0.989386	0.545191	0.498577	0.405554	0.424908	0.443649	0.573609	0.478678
03465500	2.04803	0.400815	1.17425	0.97113	0.53242	0.499093	0.400815	0.419091	0.437994	0.559654	0.470335
03470000	2.25041	0.441631	1.17747	1.0506	0.59283	0.565368	0.441631	0.465993	0.487258	0.617727	0.516215
03473000	2.06276	0.399993	1.16347	0.98068	0.541948	0.488807	0.399993	0.419596	0.439199	0.568952	0.457269
03490000	2.23705	0.439434	1.17861	1.0427	0.590064	0.56129	0.439434	0.465845	0.483775	0.620447	0.521674
03504000	1.99317	0.386591	1.16375	0.984548	0.528813	0.476271	0.386591	0.404327	0.424197	0.544148	0.447801
03512000	2.14263	0.411069	1.15112	0.998301	0.554529	0.504735	0.411069	0.430987	0.452856	0.581176	0.480713
03521500	2.08221	0.407109	1.1731	0.998011	0.554004	0.507749	0.407109	0.429493	0.448991	0.576388	0.469452
03524000	2.05406	0.39786	1.16216	0.986415	0.544082	0.488473	0.39786	0.418129	0.438132	0.564751	0.455068
03528000	2.18506	0.423033	1.16161	1.01431	0.571838	0.530001	0.423839	0.423033	0.466931	0.599162	0.490134
03531500	2.12066	0.410062	1.16019	1.01482	0.565418	0.506409	0.410062	0.410128	0.454535	0.580887	0.46667
03532000	2.04098	0.401407	1.18004	0.99599	0.548798	0.501848	0.401407	0.425957	0.442712	0.567077	0.461439
03540500	1.93776	0.384958	1.19197	0.975968	0.526059	0.483325	0.384958	0.403951	0.422137	0.538959	0.447132
03550000	1.9789	0.385925	1.17012	0.978147	0.530546	0.474671	0.385925	0.401794	0.423397	0.544015	0.4424
03567500	1.93292	0.391136	1.21413	1.00278	0.532613	0.506086	0.391136	0.40762	0.428033	0.54342	0.460783
03574500	1.78287	0.355678	1.19698	0.941592	0.496468	0.432152	0.355678	0.369533	0.385357	0.499253	0.408313
03603000	1.86281	0.372788	1.20073	0.95484	0.509138	0.476743	0.372788	0.391065	0.406247	0.522193	0.435645
04073500	1.73792	0.342585	1.18274	0.936941	0.48694	0.42033	0.342585	0.358854	0.376256	0.48774	0.395859
04079000	2.06949	0.39986	1.1593	1.02215	0.558617	0.495074	0.39986	0.416329	0.4432	0.563751	0.454735
04100500	1.96864	0.387391	1.18069	1.00522	0.540081	0.475405	0.387391	0.404661	0.425464	0.542615	0.437732
04113000	1.90227	0.372996	1.17648	0.9674	0.520035	0.460405	0.372996	0.391334	0.410147	0.528797	0.43059
04115000	1.55122	0.312243	1.20773	0.871184	0.447275	0.382747	0.312243	0.32542	0.339209	0.440482	0.36631
04144000	1.69982	0.348815	1.23124	0.931466	0.485832	0.452878	0.348815	0.363609	0.379932	0.489096	0.402887
04164000	1.6443	0.333401	1.21657	0.906683	0.470932	0.402336	0.333401	0.344607	0.362877	0.469641	0.384067
04165500	1.7134	0.343113	1.20151	0.922847	0.483225	0.415784	0.343113	0.357579	0.373879	0.488658	0.396496
04176500	1.96234	0.386851	1.18283	1.00326	0.53912	0.475278	0.386851	0.402744	0.42339	0.540682	0.438875
04178000	1.92249	0.378857	1.18239	0.998283	0.529479	0.46607	0.378857	0.385591	0.415062	0.53268	0.430731
04183500	2.15324	0.425598	1.18592	1.05138	0.579247	0.546771	0.425598	0.432945	0.469574	0.595751	0.497258
04185000	1.99126	0.389858	1.17471	1.01882	0.546349	0.480672	0.389858	0.408261	0.428798	0.548416	0.443
04191500	2.03383	0.394526	1.16389	1.00402	0.548482	0.484939	0.394526	0.394793	0.434665	0.559084	0.452001
04198000	1.93124	0.378323	1.17538	0.975346	0.528346	0.46607	0.378323	0.390392	0.416129	0.537347	0.434665
04201500	2.05275	0.402194	1.17557	1.01802	0.560551	0.495941	0.402194	0.421663	0.4456	0.566885	0.452468
04212000	1.85979	0.381849	1.23191	0.939475	0.514091	0.511634	0.381849	0.403139	0.417468	0.532515	0.447356
04221000	2.04982	0.411958	1.20584	1.00335	0.558201	0.530324	0.411958	0.432755	0.452667	0.575348	0.491385
04221500	1.78715	0.374631	1.25775	0.933038	0.50472	0.50944	0.374631	0.395723	0.40708	0.518584	0.433628
04223000	1.90746	0.374523	1.17808	0.947609	0.522012	0.458002	0.374523	0.390259	0.415262	0.53248	0.428598
05053000	1.40859	0.279109	1.18889	0.86413	0.406661	0.349386	0.279109	0.287243	0.303045	0.393392	0.335317
05244000	1.33025	0.270153	1.2185	0.821453	0.394274	0.350539	0.270153	0.280822	0.294505	0.385804	0.324313
05280000	1.54552	0.302912	1.17596	0.895601	0.439133	0.376923	0.302912	0.314647	0.332917	0.431798	0.362321
05320500	1.70876	0.334174	1.1734	0.928163	0.471222	0.412174	0.334174	0.34365	0.36466	0.470604	0.402561
05383000	1.70802	0.358647	1.25987	0.976612	0.495848	0.508364	0.358647	0.377583	0.392827	0.49328	0.421711
05408000	1.66478	0.33005	1.18952	0.925739	0.472071	0.404594	0.33005	0.343118	0.363054	0.469537	0.382591
05410490	1.7704	0.347852	1.17889	0.955343	0.495141	0.429798	0.347852	0.361788	0.382991	0.494074	0.400527
05410500	0	0		0	0	0	0	0	0	0	0
05412500	1.82098	0.354853	1.16922	0.970146	0.504342	0.4438	0.354853	0.368722	0.389458	0.499808	0.408661
05418500	1.70229	0.338051	1.19151	0.931873	0.479472	0.412862	0.338051	0.349652	0.368922	0.477605	0.388392
05422000	1.96587	0.380257	1.16057	0.988682	0.529413	0.471071	0.380257	0.395926	0.417396	0.535747	0.434132
05430500	1.77361	0.349452	1.18218	0.941208	0.49194	0.430665	0.349452	0.363655	0.385725	0.493741	0.40286
05435500	1.64939	0.327357	1.19083	0.917142	0.46903	0.402336	0.327357	0.341891	0.357851	0.466178	0.379381
05440000	1.78607	0.35201	1.18252	0.944988	0.495585	0.433306	0.35201	0.368242	0.385833	0.497148	0.405936
05447500	1.60465	0.319207	1.19356	0.8931	0.453206	0.39276	0.319207	0.333265	0.34746	0.451644	0.378498
05451500	1.76584	0.346385	1.17696	0.957877	0.491274	0.428731	0.346385	0.35832	0.37999	0.487206	0.402994
05452000	1.57557	0.318564	1.21314	0.916842	0.45889	0.390502	0.318564	0.328678	0.344553	0.4469	0.37369
05454500	1.82747	0.35412	1.16266	0.952676	0.499208	0.438466	0.35412	0.370722	0.390325	0.503209	0.412929
05455500	1.65906	0.329183	1.19049	0.937874	0.473338	0.404994	0.329183	0.341118	0.359187	0.465336	0.385058
05457700	1.74678	0.352321	1.21019	0.95566	0.490871	0.461346	0.352321	0.364841	0.384559	0.49035	0.431299
05458500	1.76266	0.343585	1.16955	0.944808	0.488473	0.424264	0.343585	0.35732	0.377923	0.489273	0.39846
05462000	1.63944	0.325393	1.19087	0.922502	0.463176	0.406241	0.325393	0.335684	0.355082	0.461547	0.392915
05471500	1.85183	0.360454	1.16788	0.98028	0.509543	0.448934	0.360454	0.372656	0.395459	0.50781	0.416529
05472500	1.68498	0.332717	1.18476	0.934273	0.473938	0.408661	0.332717	0.344052	0.363121	0.470537	0.386391
05476500	1.34651	0.273058	1.21673	0.842268	0.401537	0.35535	0.273058	0.28371	0.296233	0.390315	0.324206
05479000	1.4355	0.28651	1.19753	0.864263	0.418729	0.357787	0.28651	0.298445	0.313314	0.408728	0.33465
05481000	1.58544	0.314447	1.19001	0.915337	0.453868	0.388392	0.314447	0.326049	0.343318	0.448201	0.365655
05482500	1.56583	0.309246	1.18498	0.900668	0.445533	0.384191	0.309246	0.318648	0.339384	0.437799	0.365188
05484500	1.65692	0.323382	1.17103	0.922538	0.461269	0.399793	0.323382	0.335117	0.355987	0.458802	0.378723
05502040	1.57775	0.323795	1.23135	0.916649	0.459643	0.420264	0.323795	0.336136	0.349419	0.453708	0.379378
05507500	1.48423	0.30805	1.2453	0.870501	0.430383	0.409832	0.30805	0.320056	0.330764	0.430816	0.370677
05508000	1.57044	0.31078	1.18736	0.877332	0.4412	0.381391	0.31078	0.321915	0.336317	0.4436	0.372389
05514500	1.692	0.336961	1.1949	0.922355	0.472893	0.42091	0.336961	0.35178	0.366676	0.473591	0.416332
05515500	1.69424	0.338717	1.19954	0.918404	0.478405	0.411062	0.338717	0.35452	0.370322	0.479805	0.392792
05517000	1.75963	0.349919	1.19316	0.943475	0.494608	0.425997	0.349919	0.366788	0.382457	0.496274	0.402127
05517500	1.7567	0.350927	1.19859	0.937518	0.491676	0.427521	0.350927	0.365462	0.383714	0.49722	0.420423
05518000	1.77724	0.351653	1.18719	0.939474	0.493474	0.429131	0.351653	0.366788	0.385991	0.496608	0.406528
05520500	1.86627	0.36702	1.17996	0.961016	0.511206	0.450557	0.36702	0.383931	0.4022	0.519017	0.423187
05526000	1.77816	0.352312	1.1888	0.943928	0.492033	0.427536	0.352312	0.366914	0.382831	0.496946	0.406983
05542000	1.67587	0.333962	1.19566	0.92075	0.471945	0.411937	0.333962	0.347257	0.364362	0.468711	0.389012
05546500	2.275	0.762513	2.01103	1.35037	0.762513	2.30458	0.773163	0.84558	0.86049	0.875399	0.881789
05552500	1.92979	0.375985	1.16899	0.973377	0.52411	0.465159	0.375985	0.393507	0.413678	0.532736	0.431269
05554500	1.49955	0.304333	1.21769	0.870551	0.436634	0.373879	0.304333	0.315268	0.327968	0.432084	0.357376
05555300	1.84383	0.376103	1.22387	0.962463	0.508609	0.496198	0.376103	0.392286	0.407617	0.520533	0.462493
05555500	1.5596	0.331566	1.27558	0.894013	0.451925	0.468373	0.331566	0.348936	0.358005	0.460226	0.395973
05569500	1.63515	0.32756	1.20195	0.908449	0.462035	0.399484	0.32756	0.339582	0.354048	0.460269	0.383523
05570000	1.63728	0.327357	1.19963	0.901929	0.462103	0.398261	0.327357	0.339038	0.353572	0.46285	0.385289
05582000	1.8169	0.357647	1.18107	0.944988	0.494499	0.435819	0.357647	0.370348	0.388006	0.502785	0.413135
05584500	1.52112	0.304605	1.2015	0.872725	0.436159	0.374966	0.304605	0.317305	0.328987	0.431201	0.361179
05585000	1.5501	0.310581	1.20218	0.879109	0.44295	0.382912	0.310581	0.321516	0.336797	0.438536	0.366748
05592500	1.98206	0.384271	1.16324	0.996197	0.535045	0.477384	0.384271	0.40254	0.4221	0.542855	0.444988
05593000	1.94869	0.378158	1.16435	0.987232	0.527234	0.468419	0.378158	0.395273	0.41429	0.535249	0.437109
05594000	1.78596	0.354319	1.19035	0.954496	0.495585	0.433238	0.354319	0.367156	0.384406	0.496604	0.406004
06191500	2.50973	0.455002	1.08777	0.986815	0.581087	0.558417	0.455002	0.466403	0.492607	0.648697	0.555017
06192500	2.47753	0.451801	1.09416	0.97988	0.577287	0.552416	0.451801	0.460802	0.490007	0.64203	0.547949
06225500	2.02147	0.37699	1.11896	0.909203	0.496074	0.462936	0.37699	0.392992	0.409861	0.53408	0.466337
06334500	1.12245	0.22825	1.22009	0.704209	0.33942	0.300341	0.22825	0.236601	0.245425	0.322638	0.301995
06340500	1.17898	0.234906	1.19547	0.756195	0.358651	0.301792	0.234906	0.244125	0.254084	0.336311	0.304147
06359500	1.10776	0.2191	1.18671	0.696371	0.340184	0.283776	0.2191	0.227834	0.237836	0.313514	0.276708
06426500	1.36019	0.270744	1.19429	0.81158	0.389725	0.350499	0.270744	0.279551	0.293986	0.383201	0.333374
06441500	1.39162	0.268974	1.15969	0.826791	0.393259	0.340518	0.268974	0.276441	0.292777	0.385925	0.332717
06446000	0	0		0	0	0	0	0	0	0	0
06454500	1.44208	0.281347	1.17059	0.845212	0.401835	0.363885	0.281347	0.289937	0.306022	0.400429	0.346003
06480000	1.64999	0.323273	1.17555	0.92527	0.456473	0.405242	0.323273	0.331737	0.352972	0.453131	0.394476
06600500	1.091	0.226767	1.24712	0.737044	0.352786	0.291377	0.226767	0.236302	0.244503	0.324115	0.273641
06606600	1.26496	0.256638	1.2173	0.80252	0.384724	0.323515	0.256638	0.264973	0.278442	0.368255	0.307113
06607200	1.48827	0.297645	1.19996	0.895868	0.432798	0.368655	0.297645	0.304312	0.324449	0.42013	0.348786
06609500	1.50267	0.298711	1.19272	0.898135	0.434599	0.371256	0.298711	0.308246	0.325982	0.425864	0.349586
06799500	1.5113	0.300512	1.19306	0.908536	0.432865	0.372523	0.300512	0.307113	0.325582	0.420996	0.352786
06808500	1.66095	0.328949	1.18829	0.939548	0.47011	0.403326	0.328949	0.337415	0.357638	0.461913	0.393651
06810000	1.65468	0.325649	1.18083	0.934407	0.465336	0.40046	0.325649	0.33425	0.355453	0.460002	0.381457
06811500	1.50754	0.300598	1.19638	0.891686	0.435321	0.373496	0.300598	0.307957	0.324393	0.424042	0.370538
06813000	1.61331	0.321151	1.19438	0.928902	0.458933	0.414788	0.321151	0.330659	0.348911	0.451462	0.397385
06815000	1.54971	0.304246	1.17795	0.903202	0.440533	0.37839	0.304246	0.31358	0.332183	0.429398	0.362654
06817000	1.44089	0.287843	1.1986	0.86853	0.420796	0.358454	0.287843	0.297111	0.313047	0.410528	0.342518
06817500	1.60476	0.325661	1.21761	0.92641	0.459535	0.429966	0.325661	0.335347	0.355535	0.457189	0.385104
06820500	1.68717	0.330316	1.17469	0.933607	0.467737	0.406194	0.330316	0.340451	0.359987	0.466737	0.385791
06847000	1.33672	0.261903	1.17558	0.808355	0.384187	0.343582	0.261903	0.272914	0.284861	0.373958	0.32531
06860000	1.30726	0.256105	1.17546	0.798653	0.378523	0.323449	0.256105	0.263173	0.277308	0.363721	0.320115
06868000	1.80539	0.37529	1.24723	0.988873	0.497218	0.585999	0.37529	0.391284	0.409597	0.510895	0.462911
06869500	1.63648	0.313714	1.1502	0.916804	0.4444	0.389725	0.313714	0.321048	0.339651	0.441666	0.376256
06883000	1.50905	0.299232	1.18975	0.912019	0.431424	0.381795	0.299232	0.306814	0.321979	0.417945	0.36058
06884400	1.58383	0.313281	1.1868	0.90549	0.442554	0.399984	0.313281	0.322814	0.33736	0.440007	0.384451
06884500	1.75823	0.387667	1.32293	0.98878	0.491209	0.683806	0.387667	0.408163	0.427953	0.511706	0.500398
06885500	1.36788	0.278706	1.2225	0.861671	0.409305	0.353802	0.278706	0.286081	0.299715	0.39366	0.350599
06888500	1.47206	0.295864	1.20592	0.904353	0.432347	0.376377	0.295864	0.304095	0.32108	0.419328	0.349365
06890500	1.65429	0.352327	1.27787	0.978603	0.476917	0.519433	0.352327	0.366745	0.37987	0.480244	0.419798
06892000	1.40774	0.283843	1.20978	0.858529	0.414996	0.352653	0.283843	0.29211	0.304912	0.402727	0.340851
06894000	1.39695	0.284537	1.2221	0.868214	0.416558	0.353461	0.284537	0.290767	0.304632	0.399344	0.344352
06897500	1.79522	0.349652	1.16861	0.964411	0.492274	0.433132	0.349652	0.359454	0.382124	0.490674	0.408261
06898000	1.52628	0.304046	1.19524	0.890267	0.438132	0.375456	0.304046	0.31378	0.331983	0.430931	0.359121
06899500	1.71698	0.33585	1.17363	0.935207	0.474938	0.411928	0.33585	0.347185	0.365521	0.472338	0.396126
06908000	1.42379	0.284909	1.20064	0.856662	0.413395	0.353253	0.284909	0.294311	0.308313	0.408528	0.342851
06913500	1.53131	0.305913	1.19863	0.916671	0.4426	0.377123	0.305913	0.31418	0.330316	0.431665	0.363054
06914000	1.48779	0.297949	1.20158	0.900435	0.43317	0.369193	0.297949	0.307186	0.32138	0.421081	0.355338
06928000	1.85046	0.37988	1.23174	1.00216	0.514672	0.521468	0.37988	0.39503	0.41103	0.522459	0.450391
06933500	1.77951	0.351519	1.18522	0.945208	0.489807	0.429131	0.351519	0.365255	0.381657	0.493807	0.408395
07019000	1.88955	0.368189	1.16913	0.972813	0.511477	0.455668	0.368189	0.383524	0.403594	0.519945	0.430865
07029500	1.56688	0.322605	1.23534	0.875272	0.449641	0.409057	0.322605	0.336581	0.347152	0.452418	0.37815
07049000	1.67976	0.362106	1.29342	0.961264	0.485785	0.512067	0.362106	0.375161	0.388044	0.491282	0.450399
07052500	1.57963	0.316314	1.20147	0.892934	0.448001	0.387391	0.316314	0.327249	0.340518	0.4454	0.374123
07056000	1.56309	0.315381	1.2106	0.890134	0.445734	0.383991	0.315381	0.325449	0.337117	0.442	0.374256
07057500	1.68186	0.334984	1.19505	0.920538	0.470804	0.407661	0.334984	0.346519	0.362454	0.471871	0.394526
07058000	1.70038	0.342462	1.20842	0.939148	0.479252	0.429887	0.342462	0.355881	0.372146	0.47917	0.394348
07067000	1.84076	0.361388	1.17795	0.970812	0.500608	0.442266	0.361388	0.374456	0.391925	0.505076	0.418129
07068000	1.84507	0.361454	1.17542	0.960277	0.499142	0.4442	0.361454	0.374123	0.390125	0.506209	0.41993
07069500	1.53313	0.310395	1.21475	0.868482	0.437911	0.38856	0.310395	0.322108	0.332494	0.439707	0.37021
07072000	1.70729	0.337003	1.18434	0.917125	0.46919	0.419343	0.337003	0.353593	0.365214	0.478287	0.40344
07074000	1.53263	0.312347	1.22279	0.890347	0.44447	0.391762	0.312347	0.322733	0.335539	0.441113	0.373646
07144200	1.34282	0.26804	1.19766	0.855728	0.398793	0.338784	0.26804	0.274775	0.289577	0.379724	0.325115
07144780	1.30019	0.265079	1.22326	0.83081	0.387084	0.357391	0.265079	0.272723	0.28556	0.370033	0.344358
07147070	1.30831	0.270228	1.23929	0.854758	0.399599	0.356861	0.270228	0.281091	0.289282	0.379744	0.349917
07147800	1.46823	0.290377	1.18664	0.8916	0.423997	0.361721	0.290377	0.298511	0.31418	0.411195	0.347852
07152000	1.46086	0.286043	1.17483	0.874264	0.418996	0.359387	0.286043	0.296178	0.310913	0.407995	0.349519
07163000	1.2032	0.251586	1.25458	0.816118	0.377259	0.327788	0.251586	0.260203	0.266427	0.356832	0.304887
07172000	1.20616	0.248437	1.23585	0.812122	0.373923	0.313447	0.248437	0.256305	0.265707	0.352786	0.302712
07177500	1.30348	0.264973	1.21969	0.835859	0.392926	0.331783	0.264973	0.273308	0.283909	0.377457	0.319781
07183000	1.64025	0.319515	1.16878	0.924405	0.458069	0.39786	0.319515	0.328983	0.348119	0.454401	0.382724
07186000	1.48732	0.299845	1.2096	0.869064	0.430331	0.369322	0.299845	0.309846	0.323449	0.42353	0.357187
07196500	1.56261	0.311713	1.1969	0.896534	0.4468	0.384791	0.311713	0.323382	0.337584	0.443667	0.372789
07197000	1.54597	0.311582	1.20927	0.893846	0.446315	0.382836	0.311582	0.322669	0.33504	0.437594	0.386419
07211500	1.31804	0.249902	1.13761	0.733196	0.356408	0.321824	0.249902	0.261802	0.270579	0.365705	0.345996
07221000	1.79547	0.331349	1.10728	0.880902	0.447789	0.414467	0.331349	0.341084	0.355985	0.470403	0.420458
07222500	1.26671	0.242465	1.14848	0.751058	0.360028	0.317571	0.242465	0.251526	0.262608	0.346475	0.312105
07243500	1.43728	0.288177	1.20301	0.870264	0.415396	0.357054	0.288177	0.296111	0.308113	0.402594	0.345252
07252000	1.62046	0.324987	1.20331	0.910608	0.457946	0.402913	0.324987	0.336727	0.350375	0.45413	0.386623
07261000	1.72148	0.344382	1.2003	0.942118	0.480146	0.42904	0.344382	0.35642	0.372498	0.479525	0.426943
07288500	1.71279	0.343563	1.20352	0.929411	0.480581	0.435417	0.343563	0.359778	0.373021	0.482958	0.423872
07289500	1.97329	0.404581	1.23017	1.00653	0.537238	0.557067	0.404581	0.422566	0.442241	0.555991	0.479133
07290000	2.07754	0.399231	1.15299	1.00934	0.542897	0.49324	0.399231	0.416373	0.43644	0.561808	0.467051
07307800	1.20122	0.242951	1.21352	0.771691	0.35661	0.330656	0.242951	0.25202	0.258581	0.340401	0.322551
07340000	1.47265	0.294251	1.19886	0.855625	0.422622	0.36643	0.294251	0.305393	0.315911	0.419578	0.355357
07346000	1.41829	0.295265	1.2491	0.861285	0.414789	0.391635	0.295265	0.30559	0.312578	0.41093	0.383917
07346050	1.16	0.251035	1.29845	0.801731	0.369733	0.332769	0.251035	0.257807	0.264485	0.349041	0.302859
07346070	1.38739	0.282625	1.22225	0.842338	0.405183	0.349544	0.282625	0.290791	0.299926	0.396879	0.343523
07348000	1.6631	0.331791	1.19701	0.918145	0.462665	0.414095	0.331791	0.342879	0.357716	0.465007	0.39754
07363500	1.86809	0.366137	1.17597	0.971203	0.507878	0.451847	0.366137	0.379856	0.396971	0.51501	0.430657
07375500	1.69206	0.335842	1.19088	0.894656	0.464975	0.408713	0.335842	0.349475	0.36553	0.475147	0.397225
07378000	1.46576	0.299926	1.22773	0.849397	0.426913	0.367468	0.299926	0.309614	0.322071	0.422899	0.350859
07378500	1.66797	0.331828	1.19365	0.885659	0.459438	0.403038	0.331828	0.343939	0.361239	0.468366	0.389128
08013500	1.56257	0.314496	1.20761	0.871772	0.438941	0.387519	0.314496	0.325115	0.337479	0.441123	0.39021
08015500	1.61805	0.325057	1.20536	0.87702	0.449286	0.40431	0.325057	0.335676	0.351136	0.454907	0.390724
08032000	1.50874	0.298578	1.1874	0.86693	0.425264	0.369855	0.298578	0.30818	0.319915	0.42033	0.362921
08033500	1.68835	0.326782	1.16131	0.891867	0.453335	0.399993	0.326782	0.340184	0.352986	0.463269	0.39986
08055500	1.36142	0.274641	1.21039	0.850794	0.399327	0.342785	0.274641	0.280442	0.292044	0.386325	0.338517
08085500	1.0535	0.207364	1.18101	0.724642	0.326582	0.272641	0.207364	0.217366	0.2203	0.299245	0.280242
08095000	1.21604	0.24674	1.21743	0.818528	0.368242	0.312347	0.24674	0.254686	0.261885	0.348139	0.307933
08103800	1.13499	0.23971	1.2672	0.80365	0.357272	0.321704	0.23971	0.245232	0.25272	0.331438	0.321797
08146000	1.24621	0.244066	1.17508	0.802474	0.363617	0.317221	0.244066	0.253129	0.26097	0.345993	0.323551
08150000	1.17769	0.23132	1.17851	0.770438	0.350858	0.302869	0.23132	0.240744	0.246761	0.327008	0.31715
08150700	1.3518	0.278378	1.23559	0.848078	0.387745	0.386172	0.278378	0.285637	0.291928	0.383026	0.376009
08167500	1.06342	0.214365	1.20948	0.738777	0.331183	0.277175	0.214365	0.223434	0.226634	0.306179	0.284509
08171000	0.967201	0.199897	1.24005	0.713574	0.317514	0.261106	0.199897	0.208298	0.211298	0.283576	0.264706
08171300	0.956813	0.204613	1.28309	0.7217	0.31862	0.271977	0.204613	0.210207	0.213043	0.284977	0.277413
08172000	0.943181	0.193629	1.23176	0.689703	0.308713	0.252638	0.193629	0.201964	0.204097	0.278242	0.255372
08189500	0.889977	0.186361	1.2564	0.678502	0.301979	0.242436	0.186361	0.194696	0.194162	0.261706	0.246037
08205500	1.35224	0.260906	1.15766	0.82279	0.37899	0.329383	0.260906	0.268774	0.276641	0.366055	0.346385
08340500	1.56497	0.297887	1.14208	0.848065	0.411126	0.392755	0.297887	0.307308	0.318425	0.421677	0.387951
09127998	0	0		0	0	0	0	0	0	0	0
09132500	1.73774	0.326849	1.12853	0.858129	0.445867	0.400193	0.326849	0.341185	0.352053	0.468337	0.416729
09251000	2.17842	0.391592	1.07856	0.90987	0.50801	0.482606	0.391592	0.412062	0.420396	0.561418	0.505409
09292500	1.55862	0.299178	1.1517	0.847327	0.415596	0.369922	0.299178	0.306846	0.321315	0.419196	0.381524
09299500	1.5905	0.305379	1.15201	0.863463	0.424997	0.377123	0.305379	0.314914	0.328049	0.429264	0.383924
09430500	1.49795	0.270174	1.08217	0.785851	0.383724	0.341585	0.270174	0.278909	0.289043	0.386925	0.366522
09431500	1.52326	0.275153	1.08381	0.798777	0.387844	0.355122	0.275153	0.285321	0.293425	0.392125	0.368043
09442692	1.68249	0.318914	1.13729	0.866606	0.429925	0.439095	0.318914	0.329412	0.341961	0.444284	0.43089
09444500	1.61118	0.281909	1.04983	0.807988	0.395393	0.356053	0.281909	0.292711	0.302445	0.408195	0.386725
09497500	1.78058	0.309113	1.04161	0.849994	0.421797	0.387992	0.309113	0.318648	0.33025	0.444467	0.422863
10296000	1.01226	0.195609	1.15944	0.647859	0.31599	0.260678	0.195609	0.204088	0.209942	0.282681	0.274876
10296500	0.965338	0.188199	1.16974	0.624165	0.307977	0.263221	0.188199	0.200596	0.202447	0.27103	0.270064
10301500	0.963373	0.189028	1.17729	0.631828	0.306179	0.250638	0.189028	0.198496	0.200897	0.270174	0.266107
10309000	1.00314	0.195763	1.1709	0.638096	0.313714	0.258239	0.195763	0.204431	0.208231	0.276308	0.265707
10312000	0.954977	0.186906	1.1743	0.609481	0.304537	0.249185	0.186906	0.195667	0.198791	0.266775	0.258014
11025500	0.746282	0.148489	1.19383	0.548082	0.276575	0.209298	0.148489	0.156957	0.158157	0.211298	0.209565
11080500	0.623799	0.134069	1.28954	0.491204	0.263769	0.232264	0.134069	0.146487	0.143728	0.182362	0.185006
11138500	0.732923	0.142558	1.16704	0.52337	0.275687	0.208771	0.142558	0.149524	0.153957	0.201312	0.193502
11160000	0.924587	0.170456	1.10615	0.576895	0.303072	0.242941	0.170456	0.177981	0.185862	0.244147	0.236693
11210500	0.845991	0.201248	1.42731	0.635072	0.313554	0.413647	0.201248	0.21585	0.220629	0.26364	0.264436
11213500	0.845802	0.16903	1.19908	0.571068	0.294569	0.264524	0.16903	0.179536	0.184788	0.23679	0.232272
11222000	0.812864	0.199487	1.47248	0.616484	0.309174	0.449313	0.199487	0.219374	0.221549	0.259769	0.265362
11224500	0.777341	0.149289	1.15231	0.533013	0.284109	0.215432	0.149289	0.155823	0.161291	0.211498	0.20283
11281000	1.04933	0.193018	1.10367	0.641402	0.322399	0.26467	0.193018	0.200896	0.208028	0.274518	0.264534
11342000	1.46925	0.25839	1.05519	0.794011	0.384624	0.33907	0.25839	0.265926	0.28073	0.366524	0.362217
11355500	1.49316	0.276485	1.11101	0.850372	0.402849	0.364096	0.276485	0.28501	0.299217	0.390063	0.372541
11401500	1.07573	0.205165	1.14433	0.660999	0.32555	0.281563	0.205165	0.215304	0.221131	0.293378	0.281324
11403000	1.28772	0.253639	1.18181	0.750035	0.365692	0.382365	0.253639	0.26466	0.268475	0.346757	0.344072
11413000	1.26777	0.229168	1.08458	0.721975	0.355053	0.302979	0.229168	0.237436	0.249104	0.328249	0.308446
11427000	1.33134	0.237969	1.07247	0.751313	0.368589	0.315247	0.237969	0.246304	0.258239	0.338317	0.318048
11497500	1.16601	0.233638	1.20225	0.720321	0.344501	0.320196	0.233638	0.243822	0.250546	0.330764	0.328074
11501000	1.17986	0.225211	1.14527	0.692203	0.336593	0.290071	0.225211	0.235194	0.241443	0.325455	0.305216
11530000	1.54054	0.266707	1.03875	0.794786	0.394859	0.347786	0.266707	0.277842	0.29171	0.386058	0.364055
11532500	1.82678	0.316047	1.03805	0.894001	0.4472	0.40066	0.316047	0.329249	0.343318	0.453935	0.410395
12027500	2.67572	0.459336	1.03001	1.00855	0.591889	0.576353	0.459336	0.473404	0.495341	0.655498	0.58042
12098500	2.6828	0.46927	1.04951	1.01655	0.602624	0.584621	0.46927	0.488207	0.507676	0.668834	0.579487
12134500	2.55871	0.4458	1.04537	0.982281	0.573886	0.557817	0.4458	0.46747	0.481272	0.642363	0.558884
12144500	2.63168	0.465975	1.06238	1.01377	0.597064	0.590108	0.465975	0.477817	0.504979	0.664638	0.584477
12149000	2.62149	0.458335	1.04903	1.00322	0.592956	0.572819	0.458335	0.478939	0.497008	0.658299	0.570019
12340000	1.87343	0.354453	1.1352	0.876398	0.474271	0.432465	0.354453	0.371656	0.383324	0.509676	0.438332
12358500	2.01381	0.377723	1.1254	0.898001	0.499275	0.461669	0.377723	0.393992	0.411462	0.539548	0.459402
12413000	1.87889	0.347786	1.11061	0.874398	0.469804	0.426864	0.347786	0.364855	0.37779	0.502675	0.436399
12413500	1.98529	0.369435	1.11652	0.890979	0.486428	0.468602	0.369435	0.386634	0.396578	0.527815	0.461793
12449500	1.95259	0.37276	1.14543	0.933431	0.489265	0.513484	0.37276	0.387514	0.40199	0.51766	0.483419
12449950	1.97105	0.364529	1.10965	0.942203	0.488472	0.461787	0.364529	0.373927	0.396081	0.517591	0.458011
12459000	1.01241	0.194563	1.15307	0.565685	0.300378	0.256172	0.194563	0.208565	0.208098	0.289377	0.257039
12462500	1.08885	0.212548	1.17123	0.602692	0.316131	0.293315	0.212548	0.226238	0.229341	0.309833	0.296509
13186000	1.59843	0.296444	1.11276	0.840126	0.415196	0.372122	0.296444	0.305312	0.319315	0.423464	0.386858
13200000	1.64201	0.308956	1.12894	0.86839	0.432019	0.386318	0.308956	0.316467	0.334369	0.438618	0.405062
13298500	1.65836	0.329778	1.19315	0.872123	0.436211	0.46615	0.329778	0.342203	0.351634	0.459863	0.440852
13302500	1.57079	0.295244	1.12776	0.802787	0.406061	0.364255	0.295244	0.309113	0.318381	0.425264	0.384591
13336500	2.19712	0.398393	1.08795	0.932807	0.521212	0.49154	0.398393	0.418596	0.432265	0.571619	0.498075
13337000	2.2448	0.407661	1.08961	0.953343	0.537814	0.505676	0.407661	0.427531	0.443467	0.584821	0.503075
13340500	2.60627	0.488755	1.12518	1.04767	0.615811	0.675394	0.488755	0.512588	0.530379	0.682108	0.591474
13340600	2.62427	0.47243	1.08014	1.0283	0.601818	0.60223	0.47243	0.492003	0.509722	0.665791	0.582451
13351000	2.2746	0.419233	1.10586	1.02352	0.564915	0.526745	0.419233	0.426373	0.459029	0.591846	0.501016
14080500	1.70811	0.320671	1.1264	0.868473	0.435071	0.409621	0.320671	0.330851	0.346121	0.455264	0.418299
14101500	1.84217	0.333486	1.08618	0.864406	0.449516	0.431853	0.333486	0.346689	0.362778	0.480906	0.424159
14113000	1.75727	0.311513	1.06363	0.849727	0.430931	0.389125	0.311513	0.322515	0.337517	0.451668	0.400593
14232500	2.40596	0.416942	1.03977	0.957039	0.537974	0.530391	0.416942	0.432109	0.449627	0.595837	0.537899
14233400	2.36097	0.415224	1.05522	0.94538	0.535215	0.525097	0.415224	0.433009	0.447949	0.593708	0.53308
14308000	1.91082	0.336933	1.05797	0.898669	0.462239	0.420334	0.336933	0.352146	0.368174	0.487164	0.434257
14321000	1.89533	0.331296	1.04877	0.870823	0.454156	0.414154	0.331296	0.348547	0.361654	0.482546	0.432695
14359000	1.78636	0.317645	1.0669	0.864032	0.43969	0.398193	0.317645	0.332179	0.346373	0.461152	0.412252
