# Supplementary material for: Data compression to define information content of hydrological time series
Source: Copernicus journal article supplement (doi:10.5194/hess-17-3171-2013), 2013-08-06
Supplement: Supplementary file 5 [file results_P_8bits.xls]

## Sheet: Sheet1
gauge nr	H	Cbest	C/H	WAVPACK	ARJ	PPMD	LZMA	BZIP2	PNG	GIF	TIFF
01048000	2.78971	0.381704	1.09461	0.682816	0.551622	0.500029	0.401386	0.381704	0.449659	0.55168	0.442148
01055500	3.0866	0.415827	1.07776	0.742392	0.603654	0.54697	0.439381	0.415827	0.493589	0.600903	0.464146
01060000	2.77119	0.398647	1.15083	0.686538	0.547939	0.491115	0.398647	0.399111	0.446999	0.549075	0.438423
01064500	3.53985	0.468517	1.05884	0.76029	0.659465	0.615204	0.494574	0.468517	0.55919	0.674819	0.512028
01076500	3.48006	0.462274	1.06268	0.780847	0.662864	0.603723	0.488342	0.462274	0.551086	0.666416	0.507655
01127000	2.94016	0.396259	1.0782	0.73371	0.586388	0.522328	0.423514	0.396259	0.477472	0.577687	0.446317
01138000	3.73291	0.501839	1.07549	0.801839	0.696572	0.682525	0.527926	0.501839	0.597408	0.717726	0.554766
01197500	3.27862	0.437616	1.0678	0.763214	0.638096	0.573886	0.46512	0.437616	0.526029	0.635445	0.482072
01200000	2.93486	0.395753	1.07877	0.717694	0.579857	0.522946	0.422871	0.395753	0.473149	0.575631	0.456568
01321000	3.71467	0.488023	1.05102	0.792319	0.686753	0.646997	0.517528	0.488023	0.583738	0.704456	0.53243
01329000	3.40711	0.458761	1.07719	0.799396	0.666163	0.622054	0.488973	0.458761	0.552719	0.662915	0.517825
01329500	3.23354	0.451708	1.11756	0.753833	0.634801	0.617718	0.471748	0.451708	0.533728	0.639947	0.520587
01334500	3.31037	0.439773	1.06278	0.758641	0.640546	0.576732	0.468168	0.439773	0.527868	0.640747	0.48648
01348000	4.15642	0.544417	1.04786	0.834908	0.735991	0.727763	0.568986	0.544417	0.637075	0.779162	0.592977
01361000	3.14026	0.442275	1.12672	0.744953	0.624225	0.626336	0.467872	0.442275	0.525003	0.628447	0.503892
01371500	2.86389	0.386208	1.07883	0.693404	0.559584	0.504726	0.409261	0.386208	0.457169	0.562634	0.441116
01372500	2.91899	0.391959	1.07423	0.712507	0.575586	0.516227	0.417613	0.391959	0.46992	0.573036	0.443867
01421000	3.26511	0.434851	1.06545	0.730033	0.624134	0.569377	0.460982	0.434851	0.518592	0.62989	0.485126
01423000	3.30866	0.441268	1.06694	0.731638	0.627442	0.577581	0.466382	0.441268	0.525773	0.63734	0.502132
01426500	3.44532	0.456919	1.06096	0.745512	0.644247	0.594989	0.481922	0.456919	0.543582	0.661499	0.503275
01445000	3.16203	0.455355	1.15206	0.793391	0.628179	0.683869	0.483757	0.455355	0.542974	0.640431	0.533321
01445500	2.75667	0.372256	1.08031	0.692004	0.548282	0.490124	0.39676	0.372256	0.444117	0.544932	0.427014
01500500	3.61635	0.478686	1.05894	0.758141	0.665423	0.628392	0.504919	0.478686	0.568182	0.690299	0.529907
01503000	3.54099	0.46772	1.0567	0.741211	0.649197	0.611592	0.492274	0.46772	0.553283	0.677002	0.514077
01512500	3.66706	0.483773	1.05539	0.761914	0.66805	0.632895	0.510027	0.483773	0.572836	0.699155	0.522828
01514000	3.54685	0.478052	1.07826	0.79334	0.67563	0.653993	0.510106	0.478052	0.576707	0.692191	0.530051
01518000	3.0715	0.410562	1.06935	0.690504	0.590289	0.53633	0.433465	0.410562	0.489473	0.59749	0.461269
01520000	3.06774	0.414054	1.07976	0.688104	0.590079	0.538813	0.434561	0.414054	0.490337	0.59985	0.474232
01520500	2.91368	0.394921	1.08432	0.666706	0.564705	0.519595	0.416292	0.394921	0.469808	0.571809	0.455363
01531000	3.17285	0.423313	1.06734	0.690404	0.59849	0.548532	0.444967	0.423313	0.502175	0.612242	0.473371
01534000	3.14745	0.422213	1.07316	0.714207	0.607141	0.550283	0.445167	0.422213	0.501425	0.611642	0.472621
01541000	3.61436	0.477022	1.05584	0.774916	0.66765	0.628844	0.501825	0.477022	0.565735	0.688953	0.520278
01541500	3.31334	0.440066	1.06253	0.73491	0.627544	0.576036	0.46587	0.440066	0.525629	0.637746	0.485173
01543500	3.42404	0.454368	1.06159	0.738611	0.640296	0.592789	0.478072	0.454368	0.539481	0.656799	0.498575
01548500	3.11091	0.417463	1.07355	0.697105	0.596539	0.542231	0.438666	0.417463	0.495924	0.603791	0.46522
01556000	3.10833	0.416963	1.07315	0.721408	0.60099	0.544232	0.440366	0.416963	0.496624	0.603591	0.46442
01558000	3.08353	0.413012	1.07153	0.713707	0.595589	0.538981	0.435665	0.413012	0.491374	0.59889	0.461719
01559000	3.17492	0.423664	1.06752	0.721108	0.608191	0.551283	0.446117	0.423664	0.502975	0.612792	0.471971
01560000	3.21027	0.428364	1.06748	0.707406	0.606141	0.557934	0.450668	0.428364	0.507076	0.618393	0.478422
01562000	3.0943	0.413962	1.07026	0.695804	0.588088	0.538081	0.435015	0.413962	0.489773	0.59809	0.46572
01567000	3.30224	0.439466	1.06465	0.722008	0.615992	0.569335	0.461169	0.439466	0.515277	0.632295	0.487073
01574000	2.70424	0.368355	1.08971	0.6684	0.53263	0.481372	0.388558	0.368355	0.433965	0.53338	0.421513
01595000	3.47981	0.46463	1.06817	0.759368	0.65536	0.616942	0.489789	0.46463	0.551234	0.669804	0.521399
01606500	3.16706	0.423055	1.06864	0.679504	0.59262	0.549696	0.442934	0.423055	0.495459	0.60928	0.475684
01608500	3.12807	0.417813	1.06855	0.668397	0.581253	0.542586	0.437172	0.417813	0.488711	0.603623	0.472206
01610000	3.23604	0.431765	1.06739	0.679602	0.59739	0.558034	0.449517	0.431765	0.502725	0.622693	0.484473
01611500	2.94514	0.397016	1.07843	0.665679	0.557008	0.514893	0.415639	0.397016	0.465795	0.572298	0.453997
01628500	2.86897	0.387558	1.08069	0.656198	0.539231	0.497525	0.40301	0.387558	0.449717	0.556233	0.444967
01631000	2.88301	0.391359	1.08597	0.653798	0.539531	0.499525	0.404511	0.391359	0.448967	0.557934	0.448017
01634000	2.78502	0.377507	1.08439	0.647197	0.528629	0.485323	0.393759	0.377507	0.439266	0.543181	0.430065
01643000	2.67788	0.364455	1.08878	0.662099	0.524329	0.474971	0.382857	0.364455	0.426614	0.526879	0.417963
01649500	2.59392	0.353981	1.09172	0.691196	0.520881	0.465516	0.377874	0.353981	0.418934	0.517067	0.412157
01663500	2.6521	0.381794	1.15167	0.659901	0.51617	0.477716	0.381794	0.397383	0.423244	0.526747	0.419515
01664000	2.64324	0.377107	1.14135	0.651598	0.511577	0.46662	0.377107	0.391809	0.419563	0.519678	0.412662
01667500	2.61905	0.359108	1.09691	0.644254	0.508252	0.462459	0.375	0.359108	0.415444	0.518032	0.414578
01668000	2.63608	0.375956	1.14096	0.641796	0.509526	0.46547	0.375956	0.389908	0.417363	0.518678	0.412562
01672500	2.69709	0.368424	1.0928	0.660357	0.523938	0.478318	0.384933	0.368424	0.428902	0.532633	0.423068
01674500	2.82402	0.382028	1.08223	0.678862	0.540861	0.497435	0.400943	0.382028	0.445302	0.552469	0.438047
02016000	3.00325	0.40251	1.0722	0.672501	0.562034	0.519628	0.420263	0.40251	0.46972	0.579287	0.461519
02018000	3.03957	0.408111	1.07413	0.699305	0.573036	0.53053	0.427664	0.408111	0.476922	0.586938	0.46607
02030500	2.49477	0.344429	1.10448	0.638327	0.490289	0.451389	0.360699	0.344429	0.4	0.498997	0.399943
02055000	2.96075	0.39751	1.07408	0.701405	0.562284	0.518478	0.417863	0.39751	0.46762	0.573886	0.455068
02058400	2.88902	0.406766	1.12638	0.686573	0.548201	0.522238	0.412334	0.406766	0.458272	0.5624	0.461265
02083500	2.74917	0.372662	1.08443	0.654296	0.521356	0.481795	0.386666	0.372662	0.428779	0.536161	0.43188
02102000	2.81849	0.381107	1.08174	0.663199	0.53233	0.492074	0.39736	0.381107	0.438766	0.545682	0.439616
02116500	3.51729	0.46407	1.05552	0.762314	0.634545	0.604141	0.482822	0.46407	0.536981	0.653948	0.529779
02118000	3.08445	0.413912	1.07354	0.717108	0.575936	0.53528	0.431165	0.413912	0.477372	0.591139	0.46807
02121000	0	0		0	0	0	0	0	0	0	0
02126000	2.94564	0.39716	1.07864	0.695204	0.553583	0.513227	0.413312	0.39716	0.459419	0.569735	0.460319
02135000	2.89038	0.390383	1.0805	0.655664	0.536879	0.501681	0.403678	0.390383	0.447891	0.55761	0.451253
02138500	3.38273	0.446567	1.05611	0.726409	0.614542	0.576887	0.46672	0.446567	0.522878	0.639846	0.506126
02143000	2.96757	0.39731	1.07107	0.689403	0.549932	0.514277	0.414662	0.39731	0.457369	0.567435	0.460519
02143040	2.86112	0.396594	1.10892	0.682204	0.540968	0.516594	0.405476	0.396594	0.450885	0.556127	0.465843
02143500	3.00028	0.412745	1.10055	0.726016	0.566245	0.527227	0.423625	0.412745	0.469932	0.577661	0.472612
02156500	3.33452	0.442207	1.06092	0.721752	0.59973	0.572222	0.457829	0.442207	0.508227	0.6262	0.510095
02165000	2.88502	0.393286	1.09056	0.685513	0.545691	0.506011	0.407753	0.393286	0.452323	0.559698	0.450896
02174000	0	0		0	0	0	0	0	0	0	0
02192000	3.14336	0.419213	1.06692	0.722908	0.579337	0.543432	0.436165	0.419213	0.485273	0.594839	0.484673
02202000	0	0		0	0	0	0	0	0	0	0
02202500	3.4068	0.449317	1.05511	0.73211	0.607391	0.577787	0.46457	0.449317	0.516227	0.636195	0.524979
02217500	3.1717	0.422113	1.0647	0.747612	0.591089	0.550833	0.444167	0.422113	0.494624	0.606141	0.486123
02218500	3.15646	0.431395	1.09336	0.755587	0.592467	0.583296	0.45223	0.431395	0.50325	0.614638	0.49951
02219500	3.0244	0.41617	1.10083	0.743122	0.575995	0.559701	0.436649	0.41617	0.485175	0.591844	0.482148
02228000	3.40949	0.450618	1.05732	0.724009	0.59734	0.577087	0.461719	0.450618	0.510977	0.627444	0.526379
02236000	3.56137	0.465276	1.04516	0.675906	0.589692	0.588498	0.465276	0.467975	0.509706	0.643102	0.545002
02273000	3.59578	0.46486	1.03424	0.677982	0.586837	0.588446	0.46486	0.468078	0.505087	0.639105	0.544898
02296750	3.28106	0.432915	1.05555	0.672901	0.559884	0.545282	0.433465	0.432915	0.472971	0.59834	0.509876
02329000	2.9649	0.404761	1.09214	0.670701	0.538481	0.508676	0.409061	0.404761	0.452668	0.563885	0.462269
02339500	3.67355	0.482022	1.04971	0.768515	0.644997	0.626844	0.496574	0.482022	0.551883	0.674251	0.557434
02347500	3.19783	0.426764	1.06763	0.721208	0.584838	0.548982	0.442166	0.426764	0.490774	0.603791	0.496024
02349500	3.15027	0.418913	1.06382	0.696104	0.571186	0.539731	0.434315	0.418913	0.481022	0.594389	0.490224
02365500	3.03322	0.405266	1.06887	0.673722	0.547858	0.519257	0.418121	0.405266	0.462416	0.577026	0.482499
02375500	3.09077	0.413112	1.06928	0.674901	0.554183	0.525229	0.422563	0.413112	0.46822	0.584038	0.486823
02383500	3.47668	0.459936	1.05833	0.786511	0.636799	0.598543	0.481687	0.459936	0.538179	0.652845	0.522541
02387000	3.26027	0.433115	1.06277	0.765115	0.611442	0.568185	0.456819	0.433115	0.510227	0.620493	0.493124
02387500	3.42539	0.451818	1.05522	0.772216	0.628344	0.588638	0.474121	0.451818	0.529479	0.645247	0.517778
02414500	3.38418	0.447484	1.05782	0.741443	0.61252	0.579462	0.465159	0.447484	0.518337	0.63422	0.513549
02437000	3.71992	1	2.15059	1.47458	1.05085	4.16102	1.19492	1.26695	1.44915	1.25847	1.2839
02448000	2.36644	0.32707	1.10569	0.605432	0.464772	0.420675	0.3409	0.32707	0.377029	0.472289	0.385448
02456500	2.95554	0.416819	1.12824	0.707416	0.559749	0.517166	0.416819	0.419978	0.463172	0.570854	0.456296
02472000	2.80967	0.378057	1.07644	0.670601	0.53048	0.489873	0.39741	0.378057	0.439116	0.544482	0.438066
02475000	3.2601	0.431265	1.05829	0.724409	0.592939	0.556834	0.448717	0.431265	0.496074	0.611992	0.500775
02475500	2.83343	0.382657	1.08041	0.696204	0.540281	0.496274	0.40141	0.382657	0.444817	0.548682	0.439566
02478500	3.13154	0.416913	1.06507	0.709306	0.574786	0.539681	0.434015	0.416913	0.480322	0.595439	0.483373
02479300	3.02339	0.408001	1.07959	0.703536	0.563015	0.534403	0.425652	0.408001	0.472224	0.584381	0.482319
02482000	2.55543	0.347313	1.08729	0.63377	0.492593	0.450305	0.365429	0.347313	0.402712	0.502602	0.407417
02486000	2.96233	0.398421	1.07596	0.682904	0.550354	0.512512	0.414829	0.398421	0.459286	0.567121	0.462004
02492000	2.94643	0.410547	1.1147	0.675144	0.54352	0.509524	0.410547	0.42238	0.455494	0.565682	0.460528
03010500	3.56598	0.470171	1.05479	0.750313	0.653248	0.617793	0.495574	0.470171	0.556283	0.680752	0.515727
03011020	3.59276	0.473971	1.05539	0.737511	0.651748	0.620193	0.497325	0.473971	0.558634	0.687653	0.518928
03020500	3.50094	0.462669	1.05725	0.73501	0.643547	0.606841	0.487123	0.462669	0.547932	0.66895	0.509176
03024000	3.53071	0.46707	1.0583	0.725309	0.641046	0.607941	0.487923	0.46707	0.547732	0.675001	0.508026
03032500	3.65722	0.481572	1.05342	0.785218	0.676802	0.635245	0.509426	0.481572	0.576086	0.695554	0.523078
03050500	3.55524	0.470335	1.05835	0.731793	0.646457	0.615988	0.490475	0.470335	0.551466	0.677187	0.520114
03051000	3.66464	0.482846	1.05407	0.746873	0.660767	0.634349	0.507344	0.482846	0.56563	0.696787	0.533347
03054500	3.70135	0.488659	1.05618	0.747496	0.662999	0.641615	0.50942	0.488659	0.569731	0.700784	0.537032
03065000	3.33927	0.443738	1.06308	0.701721	0.616998	0.579084	0.466402	0.443738	0.521896	0.645645	0.493355
03069000	3.6075	0.478112	1.06026	0.737468	0.654095	0.632561	0.502177	0.478112	0.560838	0.688809	0.53036
03069500	3.58221	0.472933	1.05618	0.734624	0.650075	0.619557	0.495822	0.472933	0.554887	0.684538	0.520527
03070000	3.63402	0.4804	1.05756	0.739414	0.656913	0.632315	0.504156	0.4804	0.563518	0.692463	0.530888
03075500	3.43938	0.455418	1.0593	0.73521	0.640196	0.59719	0.480322	0.455418	0.539031	0.661549	0.502775
03079000	3.2171	0.428564	1.06571	0.696104	0.603791	0.556734	0.450368	0.428564	0.504476	0.621893	0.476521
03109500	3.39302	0.449517	1.05986	0.742411	0.636245	0.588438	0.473171	0.449517	0.53553	0.648297	0.501725
03111500	3.42162	0.452468	1.0579	0.773916	0.649847	0.59939	0.481172	0.452468	0.543081	0.655448	0.506026
03114500	3.73415	0.491514	1.05301	0.787959	0.679014	0.651778	0.51789	0.491514	0.580333	0.708257	0.545356
03136000	3.16348	0.429577	1.08634	0.744781	0.612733	0.58226	0.454531	0.429577	0.511317	0.620571	0.496841
03155500	3.6604	0.482987	1.05559	0.789224	0.673968	0.642811	0.510747	0.482987	0.572064	0.696574	0.537862
03159500	3.32511	0.440366	1.05949	0.754313	0.630695	0.576586	0.46607	0.440366	0.523829	0.637646	0.494624
03161000	3.22607	0.428986	1.0638	0.710242	0.593469	0.554161	0.44864	0.428986	0.504351	0.614023	0.497149
03164000	3.46666	0.457469	1.0557	0.73571	0.625294	0.593989	0.477022	0.457469	0.53408	0.651648	0.522778
03165500	3.55164	0.473449	1.06643	0.750146	0.638531	0.629169	0.49232	0.473449	0.549298	0.670933	0.541764
03167000	3.53829	0.46657	1.05491	0.775516	0.651248	0.613742	0.491274	0.46657	0.551733	0.671151	0.519728
03168000	3.65751	0.480572	1.05115	0.763615	0.649997	0.625644	0.500925	0.480572	0.559184	0.680902	0.544782
03173000	3.49114	0.461269	1.05701	0.762514	0.643347	0.603691	0.483673	0.461269	0.541781	0.659649	0.512377
03175500	3.65107	0.480261	1.05232	0.776018	0.662167	0.63033	0.50354	0.480261	0.56314	0.686109	0.536142
03179000	3.57073	0.472119	1.05775	0.76124	0.652717	0.620581	0.495581	0.472119	0.554998	0.676342	0.527226
03180500	3.33293	0.445806	1.07006	0.706471	0.618748	0.579015	0.466791	0.445806	0.52245	0.644368	0.498535
03182500	3.29468	0.439443	1.06704	0.699164	0.610082	0.569434	0.457769	0.439443	0.513108	0.633598	0.492135
03183500	3.43996	0.45539	1.05906	0.714071	0.624072	0.590803	0.476514	0.45539	0.531634	0.653864	0.50942
03184000	3.52629	0.466186	1.05762	0.725593	0.635439	0.605128	0.486324	0.466186	0.542586	0.668137	0.519853
03186500	3.52502	0.467743	1.06154	0.732236	0.642809	0.608553	0.489697	0.467743	0.547776	0.671407	0.511548
03198500	3.84265	0.504697	1.05073	0.815488	0.698344	0.672289	0.531427	0.504697	0.595889	0.721389	0.552499
03199000	3.80571	0.504507	1.06053	0.819787	0.694629	0.686136	0.531774	0.504507	0.594427	0.721895	0.562095
03213000	3.52116	0.471152	1.07045	0.749442	0.645056	0.632268	0.494275	0.471152	0.550781	0.673978	0.533234
03214000	3.72346	0.495213	1.06399	0.774587	0.670583	0.667319	0.517551	0.495213	0.577169	0.705831	0.556281
03237500	2.8579	0.384408	1.07606	0.679102	0.551383	0.503225	0.405611	0.384408	0.453868	0.558634	0.440266
03238500	3.0035	0.404811	1.07824	0.711107	0.577037	0.528579	0.425364	0.404811	0.477622	0.583187	0.458069
03251500	3.70218	0.48716	1.0527	0.789888	0.671194	0.64717	0.511755	0.48716	0.573899	0.697615	0.551244
03252500	3.30398	0.441464	1.06893	0.770015	0.629224	0.586881	0.467408	0.441464	0.525681	0.633734	0.495871
03253500	3.50386	0.461848	1.05449	0.752852	0.642115	0.604218	0.484108	0.461848	0.543704	0.66198	0.518541
03265000	3.18765	0.424464	1.06527	0.764715	0.615792	0.557034	0.451218	0.424464	0.507126	0.613842	0.477772
03266000	3.24688	0.430265	1.06013	0.771616	0.625244	0.569535	0.458219	0.430265	0.517678	0.623594	0.483873
03269500	3.00089	0.40271	1.07357	0.716307	0.582187	0.529129	0.426064	0.40271	0.478272	0.586638	0.456168
03274000	3.246	0.431065	1.06239	0.745612	0.619143	0.565635	0.455968	0.431065	0.513277	0.623444	0.485573
03281500	3.59815	0.474073	1.05404	0.790342	0.663407	0.624745	0.499287	0.474073	0.5598	0.68042	0.5299
03289500	2.77997	0.377225	1.08555	0.675358	0.541196	0.494888	0.398323	0.377225	0.443603	0.549797	0.433649
03301500	2.96502	0.402863	1.08698	0.703545	0.569326	0.521699	0.418653	0.402863	0.469743	0.575795	0.457009
03303000	2.81368	0.380007	1.08045	0.692004	0.548832	0.496124	0.40126	0.380007	0.449017	0.551183	0.438366
03308500	3.35989	0.446359	1.0628	0.754866	0.625214	0.583537	0.467483	0.446359	0.522811	0.637671	0.499818
03324300	3.29464	0.444024	1.07817	0.765646	0.630691	0.587628	0.465165	0.444024	0.523483	0.634114	0.496517
03326500	3.33813	0.442316	1.06003	0.770016	0.631795	0.579337	0.46802	0.442316	0.527429	0.635445	0.494674
03328500	3.48496	0.461069	1.05842	0.789918	0.655248	0.604441	0.485823	0.461069	0.547832	0.660749	0.509576
03331500	3.15847	0.423714	1.07321	0.740111	0.605891	0.553533	0.444217	0.423714	0.501025	0.608841	0.473721
03339500	3.10317	0.418363	1.07854	0.746312	0.59714	0.545132	0.438916	0.418363	0.492924	0.59889	0.46912
03345500	3.42699	0.452832	1.0571	0.788509	0.638142	0.592095	0.477282	0.452832	0.534994	0.647107	0.506163
03346000	3.13139	0.419163	1.07087	0.751834	0.594336	0.548085	0.442084	0.419163	0.494448	0.598411	0.473513
03348000	3.28375	0.438061	1.06722	0.775464	0.627528	0.584919	0.466607	0.438061	0.523519	0.631837	0.491083
03349000	3.26257	0.436365	1.06999	0.753013	0.617743	0.567285	0.457369	0.436365	0.513527	0.622743	0.488073
03361500	3.33569	0.443266	1.06309	0.772716	0.629244	0.581687	0.46812	0.443266	0.525379	0.636045	0.494124
03361650	3.12481	0.4278	1.09524	0.754068	0.606305	0.575485	0.449233	0.4278	0.505867	0.608964	0.498983
03362500	3.36611	0.449767	1.06893	0.776216	0.634445	0.585838	0.471921	0.449767	0.53028	0.640846	0.498425
03363000	3.36913	0.44959	1.06755	0.775017	0.634395	0.599662	0.474811	0.44959	0.532574	0.643532	0.50654
03364000	3.33481	0.443585	1.06413	0.765397	0.628705	0.580127	0.467598	0.443585	0.524314	0.63624	0.499297
03365500	3.42696	0.453568	1.05882	0.778317	0.641496	0.59729	0.477522	0.453568	0.53663	0.649447	0.506826
03381500	3.17037	0.423696	1.06914	0.745008	0.597392	0.554044	0.444835	0.423696	0.496231	0.605848	0.481612
03410500	3.58127	0.472749	1.05605	0.787795	0.660401	0.62174	0.496434	0.472749	0.55705	0.67665	0.523278
03438000	2.81577	0.402965	1.14488	0.699572	0.547423	0.499287	0.402965	0.416361	0.449317	0.55109	0.438875
03443000	3.24641	0.432615	1.06608	0.720108	0.591489	0.556383	0.448617	0.432615	0.499775	0.614842	0.497475
03448000	3.33918	0.450544	1.07941	0.737943	0.606739	0.590312	0.466409	0.450544	0.517585	0.631099	0.528607
03451500	3.37839	0.447367	1.05936	0.73431	0.612842	0.576036	0.46542	0.447367	0.519078	0.634195	0.518928
03455000	3.62553	0.476514	1.05146	0.757782	0.644314	0.62162	0.496959	0.476514	0.552517	0.676259	0.547406
03465500	3.59697	0.477323	1.06161	0.743802	0.638917	0.632063	0.496137	0.477323	0.552577	0.676611	0.552442
03470000	3.73628	0.500321	1.07127	0.797243	0.674627	0.669979	0.520997	0.500321	0.57958	0.705882	0.571085
03473000	3.58089	0.471921	1.05431	0.751413	0.645647	0.618143	0.492524	0.471921	0.550983	0.675651	0.528329
03490000	3.73302	0.497625	1.06643	0.792817	0.675578	0.675095	0.52162	0.497625	0.580079	0.710605	0.568323
03504000	3.37534	0.446767	1.0589	0.754513	0.621593	0.581237	0.46942	0.446767	0.523629	0.637946	0.511777
03512000	3.65124	0.483624	1.05964	0.763159	0.650669	0.628463	0.499167	0.483624	0.556296	0.680797	0.545799
03521500	3.56723	0.474129	1.0633	0.763985	0.65342	0.634665	0.497803	0.474129	0.556364	0.680241	0.532297
03524000	3.57491	0.471071	1.05417	0.754813	0.648097	0.619393	0.492824	0.471071	0.550483	0.673951	0.525129
03528000	3.73457	0.494457	1.0592	0.7735	0.666935	0.658335	0.516361	0.494457	0.573137	0.702278	0.558154
03531500	3.5649	0.470521	1.0559	0.774716	0.656849	0.620143	0.494624	0.470521	0.554183	0.675251	0.525329
03532000	3.49371	0.46509	1.06498	0.762852	0.646059	0.622673	0.489214	0.46509	0.54667	0.668907	0.52772
03540500	3.28422	0.440637	1.07334	0.750252	0.616341	0.587314	0.462407	0.440637	0.517974	0.629241	0.504267
03550000	3.34371	0.445267	1.06532	0.750513	0.618193	0.576036	0.46482	0.445267	0.518928	0.634345	0.501225
03567500	3.14594	0.426969	1.08577	0.769281	0.600868	0.580809	0.45194	0.426969	0.50262	0.61233	0.496398
03574500	3.03624	0.406734	1.07168	0.727486	0.579768	0.53372	0.429299	0.406734	0.478555	0.585829	0.460065
03603000	3.19879	0.435524	1.08922	0.734117	0.598636	0.578329	0.45264	0.435524	0.506527	0.615898	0.494053
04073500	3.05235	0.406911	1.06649	0.724909	0.582437	0.53243	0.427814	0.406911	0.482322	0.584888	0.459369
04079000	3.52857	0.46517	1.05464	0.780017	0.654348	0.609191	0.488823	0.46517	0.551283	0.6673	0.515227
04100500	3.35146	0.443667	1.05904	0.770716	0.637846	0.583938	0.470571	0.443667	0.53243	0.641446	0.496274
04113000	3.36384	0.446771	1.06253	0.745619	0.631775	0.581601	0.470456	0.446771	0.529493	0.642115	0.498268
04115000	2.88398	0.391442	1.08584	0.677942	0.557259	0.506062	0.40973	0.391442	0.462252	0.56378	0.443199
04144000	2.9661	0.405999	1.09504	0.722626	0.582753	0.546408	0.431173	0.405999	0.486342	0.589181	0.463234
04164000	2.9474	0.396801	1.07702	0.704564	0.573604	0.520375	0.418857	0.396801	0.473564	0.577068	0.451049
04165500	3.05593	0.409535	1.07211	0.71414	0.58914	0.534841	0.432457	0.409535	0.486756	0.592604	0.465057
04176500	3.3451	0.446159	1.06702	0.769764	0.635289	0.582264	0.46791	0.446159	0.527812	0.637581	0.493888
04178000	3.27069	0.434615	1.06306	0.765215	0.623043	0.569535	0.459069	0.434615	0.517728	0.627594	0.487373
04183500	3.55727	0.475004	1.06824	0.799872	0.668424	0.646782	0.504712	0.475004	0.567641	0.679843	0.542405
04185000	3.35654	0.444517	1.05946	0.780117	0.636746	0.582487	0.472471	0.444517	0.53183	0.642146	0.494424
04191500	3.44719	0.455368	1.05679	0.768615	0.646147	0.60014	0.479972	0.455368	0.539381	0.655548	0.507826
04198000	3.32932	0.441566	1.06104	0.751313	0.632845	0.579887	0.46607	0.441566	0.524979	0.636746	0.493624
04201500	3.4564	0.457569	1.05906	0.780717	0.655398	0.60044	0.484123	0.457569	0.547182	0.660999	0.503726
04212000	3.33582	0.454657	1.09036	0.727329	0.628557	0.619038	0.479529	0.454657	0.538178	0.653327	0.520368
04221000	3.63029	0.487762	1.07487	0.77126	0.671285	0.65801	0.514229	0.487762	0.579856	0.702149	0.555463
04221500	3.29847	0.451881	1.09598	0.725221	0.627434	0.622898	0.478429	0.451881	0.538606	0.650774	0.511726
04223000	3.53152	0.46717	1.05829	0.73161	0.644347	0.609191	0.489373	0.46717	0.551383	0.672901	0.510677
05053000	2.61966	0.358454	1.09466	0.665	0.494974	0.455168	0.366655	0.358454	0.409611	0.502025	0.414762
05244000	2.56818	0.354713	1.10495	0.636369	0.487753	0.457272	0.36192	0.354713	0.404984	0.503696	0.413719
05280000	2.80577	0.390659	1.11387	0.680902	0.53263	0.486973	0.392509	0.390659	0.439516	0.539281	0.437316
05320500	3.02317	0.404604	1.07067	0.707554	0.561357	0.522221	0.41825	0.404604	0.469952	0.571914	0.467274
05383000	2.84531	0.404862	1.13833	0.747623	0.564569	0.565531	0.426887	0.404862	0.477916	0.566494	0.46901
05408000	2.84494	0.385258	1.08335	0.713607	0.555283	0.502675	0.405111	0.385258	0.455368	0.552683	0.437866
05410490	3.04438	0.407711	1.07138	0.73061	0.581687	0.528829	0.428164	0.407711	0.481872	0.585338	0.459719
05410500	0	0		0	0	0	0	0	0	0	0
05412500	3.10908	0.412262	1.0608	0.742511	0.588338	0.541081	0.435365	0.412262	0.489373	0.593839	0.46907
05418500	2.93437	0.394009	1.07419	0.715207	0.565185	0.515627	0.415062	0.394009	0.46542	0.565835	0.448217
05422000	3.3361	0.445117	1.06739	0.757214	0.620143	0.575536	0.462369	0.445117	0.518578	0.629994	0.491074
05430500	3.12547	0.416162	1.06522	0.724809	0.591339	0.541681	0.437116	0.416162	0.491924	0.596189	0.46907
05435500	2.90017	0.391656	1.08037	0.704055	0.559291	0.510289	0.410707	0.391656	0.460116	0.561328	0.444377
05440000	3.07877	0.428178	1.1126	0.727078	0.587408	0.537439	0.432406	0.428178	0.484159	0.592655	0.4647
05447500	2.86705	0.38697	1.07977	0.687347	0.545844	0.501987	0.404238	0.38697	0.449929	0.554044	0.444326
05451500	3.00118	0.404161	1.07734	0.73131	0.572386	0.523579	0.422163	0.404161	0.473671	0.574836	0.460719
05452000	2.6514	0.382548	1.15425	0.707827	0.528383	0.472521	0.382548	0.392043	0.424897	0.5213	0.420476
05454500	3.12973	0.417863	1.06811	0.73191	0.586888	0.541831	0.435615	0.417863	0.488873	0.595889	0.472071
05455500	2.81706	0.386808	1.09847	0.718308	0.547832	0.497475	0.39996	0.386808	0.446817	0.544532	0.438566
05457700	3.03322	0.429499	1.13279	0.730986	0.581221	0.553443	0.431299	0.429499	0.486933	0.585524	0.484585
05458500	3.06512	0.408111	1.06517	0.723609	0.579487	0.53063	0.427514	0.408111	0.481872	0.585788	0.461369
05462000	2.89793	0.392082	1.08238	0.701649	0.554556	0.509967	0.407296	0.392082	0.456938	0.558832	0.453051
05471500	3.1012	0.426814	1.10103	0.747912	0.585888	0.540031	0.433615	0.426814	0.486573	0.591789	0.46747
05472500	2.88049	0.390159	1.08359	0.714907	0.553133	0.507126	0.406511	0.390159	0.455318	0.555033	0.443216
05476500	2.49646	0.356651	1.1429	0.65451	0.487589	0.448863	0.356651	0.365128	0.397207	0.489785	0.39861
05479000	2.6421	0.372656	1.12836	0.6637	0.508426	0.463069	0.372656	0.383007	0.417463	0.511977	0.409661
05481000	2.73627	0.369655	1.08076	0.699305	0.53088	0.482622	0.389108	0.369655	0.434815	0.53043	0.428114
05482500	2.76102	0.371806	1.0773	0.691504	0.53168	0.483923	0.387808	0.371806	0.434715	0.53268	0.425614
05484500	2.91756	0.405611	1.11219	0.702105	0.551433	0.506226	0.405611	0.415312	0.456018	0.557684	0.443867
05502040	2.68408	0.373984	1.11468	0.705999	0.531548	0.490991	0.390023	0.373984	0.432912	0.52851	0.432064
05507500	2.68332	0.391093	1.166	0.666829	0.517888	0.495903	0.391093	0.401071	0.432871	0.528677	0.442119
05508000	2.83937	0.387308	1.09125	0.676802	0.53533	0.495124	0.39831	0.387308	0.444217	0.546632	0.445167
05514500	2.92653	0.399534	1.09217	0.714111	0.555252	0.515857	0.413151	0.399534	0.461565	0.563573	0.469014
05515500	3.02749	0.405061	1.07035	0.711207	0.584388	0.53093	0.427864	0.405061	0.482872	0.589888	0.460469
05517000	3.07083	0.411312	1.07153	0.728909	0.593939	0.538681	0.435165	0.411312	0.490074	0.59764	0.462369
05517500	3.12806	0.418648	1.07069	0.723521	0.598489	0.547685	0.440653	0.418648	0.49602	0.604675	0.480201
05518000	3.16366	0.422163	1.06753	0.724609	0.60189	0.549632	0.443417	0.422163	0.499075	0.609341	0.475571
05520500	3.30032	0.438009	1.06174	0.739303	0.621587	0.570752	0.458945	0.438009	0.517726	0.629177	0.490016
05526000	3.11922	0.417553	1.07092	0.728084	0.592412	0.545804	0.437069	0.417553	0.491047	0.598796	0.468729
05542000	2.93961	0.396701	1.0796	0.711044	0.566	0.516305	0.41562	0.396701	0.465639	0.568533	0.454212
05546500	3.72335	0.769968	1.65436	1.01597	0.809904	1.96645	0.769968	0.832268	0.920128	0.920128	0.915335
05552500	3.32718	0.440658	1.05953	0.748472	0.621842	0.575031	0.462001	0.440658	0.519356	0.633456	0.492207
05554500	2.67447	0.363845	1.08835	0.677363	0.524857	0.475754	0.383914	0.363845	0.428229	0.526029	0.420385
05555300	3.21453	0.445063	1.10763	0.741924	0.605676	0.593448	0.46012	0.445063	0.513689	0.621829	0.513232
05555500	2.75598	0.404542	1.1743	0.691031	0.540235	0.549689	0.408808	0.404542	0.455845	0.549919	0.467143
05569500	2.8458	0.385442	1.08354	0.701202	0.547423	0.501987	0.402455	0.385442	0.449878	0.553128	0.441066
05570000	2.88439	0.393847	1.09235	0.697637	0.551803	0.50596	0.406785	0.393847	0.454156	0.558934	0.448604
05582000	3.169	0.422066	1.06549	0.726773	0.59133	0.548951	0.441269	0.422066	0.493684	0.602842	0.479319
05584500	2.6894	0.367767	1.09397	0.672881	0.520681	0.47718	0.383303	0.367767	0.426905	0.523584	0.421149
05585000	2.73884	0.372148	1.08702	0.681846	0.527914	0.483649	0.389772	0.372148	0.434749	0.532141	0.42772
05592500	3.36225	0.444835	1.05842	0.764262	0.62393	0.579921	0.465719	0.444835	0.521954	0.635289	0.50107
05593000	3.3427	0.445446	1.06608	0.759576	0.621842	0.575183	0.464191	0.445446	0.519	0.631265	0.498981
05594000	3.03367	0.425326	1.12161	0.733089	0.575031	0.529645	0.427669	0.425326	0.476671	0.581805	0.460269
06191500	4.38419	0.557584	1.01744	0.748312	0.687453	0.726659	0.569485	0.557584	0.619643	0.780367	0.659749
06192500	4.36962	0.558184	1.02194	0.743311	0.685003	0.721508	0.567535	0.558184	0.615642	0.776917	0.656398
06225500	3.76857	0.483923	1.02728	0.697205	0.620993	0.622693	0.496675	0.483923	0.549282	0.682002	0.571936
06334500	2.47314	0.343261	1.11036	0.572712	0.450216	0.42977	0.343261	0.355906	0.381256	0.480589	0.409738
06340500	2.38945	0.334343	1.1194	0.613777	0.453999	0.415847	0.334343	0.344184	0.373	0.464749	0.390058
06359500	2.291	0.317498	1.10868	0.571186	0.430315	0.396359	0.317498	0.326899	0.352653	0.443066	0.375206
06426500	2.71075	0.375291	1.10756	0.624465	0.498471	0.474495	0.375291	0.388379	0.420734	0.519144	0.435902
06441500	2.65647	0.362354	1.09123	0.642996	0.487723	0.452618	0.362354	0.372306	0.40301	0.503826	0.421463
06446000	0	0		0	0	0	0	0	0	0	0
06454500	2.72544	0.373646	1.09676	0.641171	0.496633	0.471742	0.373646	0.37593	0.416223	0.515549	0.433499
06480000	2.95274	0.397594	1.07722	0.697962	0.549894	0.511917	0.408564	0.397594	0.459517	0.560307	0.459962
06600500	2.1124	0.305696	1.15772	0.595389	0.427514	0.380207	0.305696	0.312097	0.337001	0.423614	0.345252
06606600	2.40324	0.329749	1.09768	0.636696	0.471671	0.423313	0.341401	0.329749	0.380407	0.472721	0.380457
06607200	2.62994	0.374956	1.14058	0.684803	0.513977	0.46407	0.374956	0.382157	0.417613	0.510927	0.410012
06609500	2.65664	0.373606	1.12505	0.685703	0.514777	0.46607	0.373606	0.383908	0.419113	0.515277	0.409711
06799500	2.66656	0.360104	1.08035	0.686603	0.510377	0.46637	0.373856	0.360104	0.418163	0.512477	0.415362
06808500	2.8699	0.384631	1.07218	0.720181	0.547493	0.498917	0.402217	0.384631	0.450844	0.546687	0.444192
06810000	2.89739	0.403811	1.11496	0.712907	0.549032	0.503726	0.403811	0.413012	0.452468	0.551633	0.444167
06811500	2.63711	0.371673	1.12752	0.685888	0.509645	0.463018	0.371673	0.378378	0.414277	0.50949	0.421446
06813000	2.75678	0.38272	1.11063	0.708901	0.53209	0.496434	0.393417	0.38272	0.438813	0.535591	0.448809
06815000	2.67041	0.365955	1.09632	0.690004	0.513677	0.46962	0.377907	0.365955	0.419813	0.514677	0.420063
06817000	2.58274	0.366155	1.13416	0.669	0.502875	0.454768	0.366155	0.375356	0.407661	0.501925	0.403411
06817500	2.75235	0.38518	1.11957	0.707655	0.53445	0.503785	0.394662	0.38518	0.444368	0.536744	0.438327
06820500	2.94198	0.408461	1.11071	0.710707	0.551933	0.509076	0.408461	0.418813	0.456769	0.557684	0.450368
06847000	2.50477	0.344305	1.09967	0.631684	0.463543	0.437892	0.344305	0.351274	0.381376	0.474788	0.401816
06860000	2.46959	0.337301	1.09265	0.626094	0.457819	0.422563	0.337301	0.343752	0.374456	0.46587	0.39706
06868000	2.99192	0.427677	1.14355	0.743394	0.553894	0.613526	0.430807	0.427677	0.485223	0.577017	0.514082
06869500	2.86879	0.382107	1.06556	0.693004	0.518928	0.486073	0.388058	0.382107	0.431215	0.53318	0.441216
06883000	2.63315	0.367741	1.11727	0.694239	0.498076	0.462577	0.367741	0.372796	0.407663	0.503131	0.417485
06884400	2.79948	0.38819	1.10932	0.690212	0.52145	0.494268	0.38819	0.396142	0.432261	0.530819	0.444712
06884500	2.93684	0.443149	1.20715	0.742115	0.553936	0.692552	0.443149	0.459316	0.497482	0.585741	0.548105
06885500	2.35497	0.340616	1.1571	0.666257	0.471867	0.426496	0.340616	0.346147	0.376935	0.466112	0.39515
06888500	2.49863	0.360177	1.1532	0.68904	0.494472	0.449464	0.360177	0.365733	0.398114	0.48987	0.403446
06890500	2.71695	0.402745	1.18587	0.731734	0.533065	0.555802	0.402745	0.417718	0.451546	0.54277	0.467351
06892000	2.47559	0.354403	1.14527	0.6648	0.486873	0.438216	0.354403	0.361254	0.392259	0.483623	0.396609
06894000	2.42265	0.338591	1.11809	0.661107	0.485582	0.432784	0.349392	0.338591	0.388878	0.4787	0.392444
06897500	3.05863	0.425214	1.11217	0.73621	0.570136	0.527529	0.425214	0.428614	0.474721	0.578087	0.46552
06898000	2.71697	0.374756	1.10346	0.679102	0.524779	0.476571	0.384508	0.374756	0.430465	0.525829	0.423714
06899500	2.96911	0.39686	1.0693	0.714807	0.559134	0.516077	0.414462	0.39686	0.46367	0.565335	0.456518
06908000	2.54864	0.353603	1.10994	0.657399	0.496274	0.450068	0.363355	0.353603	0.403361	0.498175	0.406461
06913500	2.6168	0.370806	1.13362	0.695804	0.508526	0.461969	0.370806	0.377257	0.412162	0.507426	0.415062
06914000	2.52519	0.362928	1.14978	0.681337	0.497504	0.448961	0.362928	0.369295	0.401895	0.495161	0.404289
06928000	3.06275	0.444834	1.16192	0.763513	0.585006	0.582351	0.444834	0.458532	0.495593	0.595306	0.49485
06933500	3.06661	0.413262	1.07809	0.724109	0.577137	0.53098	0.428764	0.413262	0.478572	0.584888	0.46722
07019000	3.20281	0.426164	1.06447	0.748412	0.595439	0.554633	0.446517	0.426164	0.498175	0.606391	0.483823
07029500	2.78732	0.379359	1.08881	0.681045	0.53672	0.506417	0.400121	0.379359	0.444803	0.547739	0.442586
07049000	2.77287	0.409044	1.18013	0.738469	0.546895	0.555269	0.416388	0.409044	0.46251	0.553079	0.483509
07052500	2.73447	0.387158	1.13268	0.691004	0.527329	0.482322	0.387158	0.40016	0.430265	0.53083	0.431665
07056000	2.74083	0.388058	1.13267	0.685103	0.527129	0.482172	0.388058	0.39976	0.432015	0.53048	0.433165
07057500	2.89871	0.392159	1.0823	0.711407	0.554433	0.507876	0.411012	0.392159	0.459319	0.560084	0.451568
07058000	2.88918	0.394145	1.09137	0.721073	0.55645	0.517658	0.413236	0.394145	0.461726	0.56072	0.449588
07067000	3.14048	0.418413	1.06586	0.743311	0.581387	0.545832	0.437266	0.418413	0.487173	0.593939	0.476722
07068000	3.17192	0.422913	1.06664	0.73631	0.585088	0.547232	0.439516	0.422913	0.490724	0.59779	0.479772
07069500	2.76795	0.393265	1.13663	0.674202	0.526032	0.491596	0.393265	0.405798	0.436018	0.538799	0.441171
07072000	3.02623	0.406537	1.0747	0.705619	0.562443	0.529759	0.421158	0.406537	0.468177	0.57781	0.470241
07074000	2.65381	0.370132	1.11577	0.687789	0.516486	0.474319	0.381318	0.370132	0.420439	0.518243	0.429048
07144200	2.37253	0.336901	1.136	0.660499	0.46422	0.419963	0.336901	0.340401	0.370856	0.462269	0.383908
07144780	2.36707	0.335955	1.13543	0.640012	0.457225	0.429369	0.335955	0.342275	0.370351	0.459283	0.401514
07147070	2.3067	0.334958	1.16169	0.658831	0.460968	0.419967	0.334958	0.340167	0.368147	0.458431	0.399399
07147800	2.5642	0.353053	1.10148	0.683302	0.493474	0.450368	0.362054	0.353053	0.40041	0.493674	0.408761
07152000	2.58671	0.353803	1.09422	0.670001	0.488723	0.447817	0.358504	0.353803	0.39771	0.492724	0.409411
07163000	2.12128	0.310892	1.17247	0.633034	0.432795	0.388869	0.310892	0.316637	0.340993	0.425015	0.356254
07172000	2.19241	0.316998	1.15671	0.627894	0.439866	0.393109	0.316998	0.323799	0.348652	0.434515	0.360904
07177500	2.34277	0.33605	1.14753	0.640796	0.463069	0.416963	0.33605	0.342901	0.369755	0.460369	0.379807
07183000	2.80641	0.381907	1.08867	0.705906	0.529929	0.487623	0.391759	0.381907	0.436816	0.53563	0.439816
07186000	2.62117	0.362154	1.10532	0.671401	0.508876	0.462769	0.372556	0.362154	0.413762	0.509176	0.420413
07196500	2.70286	0.383958	1.13645	0.689903	0.521828	0.474771	0.383958	0.385708	0.426114	0.522978	0.429014
07197000	2.62419	0.361203	1.10115	0.689956	0.512143	0.466359	0.376363	0.361203	0.416265	0.510318	0.427927
07211500	2.78087	0.364422	1.04837	0.579907	0.468902	0.460646	0.364422	0.372288	0.397055	0.512356	0.454008
07221000	3.18714	0.416994	1.04669	0.669213	0.539706	0.53145	0.416994	0.423284	0.459901	0.575199	0.505279
07222500	2.42631	0.325789	1.07419	0.598562	0.436145	0.41677	0.325789	0.330844	0.357688	0.449231	0.395541
07243500	2.5309	0.348052	1.10017	0.6669	0.485673	0.443867	0.356954	0.348052	0.391609	0.485723	0.404811
07252000	2.7839	0.3778	1.08567	0.699136	0.535579	0.494139	0.397116	0.3778	0.440537	0.540532	0.443894
07261000	2.88941	0.39908	1.10494	0.726277	0.550183	0.514242	0.410264	0.39908	0.456108	0.558979	0.467292
07288500	2.92968	0.396091	1.08159	0.717051	0.561569	0.526678	0.418057	0.396091	0.464472	0.569846	0.468802
07289500	3.28936	0.450427	1.09548	0.768965	0.614941	0.626124	0.475559	0.450427	0.529398	0.634886	0.531589
07290000	3.52075	0.462068	1.04993	0.771491	0.633794	0.601653	0.483088	0.462068	0.537677	0.655069	0.528851
07307800	2.28128	0.316159	1.10871	0.605254	0.424995	0.40864	0.316159	0.323106	0.34619	0.434908	0.394819
07340000	2.65266	0.37271	1.12403	0.6603	0.50506	0.466186	0.37271	0.385789	0.412726	0.516064	0.423107
07346000	2.56672	0.369133	1.15052	0.657854	0.493664	0.469728	0.369133	0.380006	0.406289	0.500704	0.443601
07346050	2.18373	0.322799	1.18256	0.618228	0.442579	0.406603	0.322799	0.332111	0.352074	0.439969	0.372037
07346070	2.54835	0.361395	1.13452	0.644833	0.488971	0.44911	0.361395	0.370997	0.398453	0.494317	0.414854
07348000	2.91583	0.394319	1.08187	0.703602	0.545183	0.512796	0.408902	0.394319	0.452474	0.55713	0.46448
07363500	3.1652	0.42064	1.06316	0.747148	0.588376	0.550479	0.441982	0.42064	0.491188	0.599022	0.484719
07375500	3.04739	0.412882	1.0839	0.69113	0.558312	0.524472	0.422069	0.412882	0.469871	0.58063	0.475476
07378000	2.70044	0.365963	1.08416	0.659262	0.516842	0.473037	0.383454	0.365963	0.426792	0.531271	0.426325
07378500	3.02269	0.408522	1.08122	0.685421	0.555613	0.520112	0.418799	0.408522	0.464992	0.576997	0.478019
08013500	2.83741	0.384573	1.08429	0.669976	0.527875	0.494709	0.397829	0.384573	0.440268	0.545549	0.456633
08015500	2.92627	0.397048	1.08547	0.67873	0.538475	0.510131	0.409054	0.397048	0.453268	0.558855	0.464219
08032000	2.68254	0.374306	1.11627	0.6685	0.503876	0.46422	0.374306	0.375406	0.412362	0.511577	0.426564
08033500	3.08305	0.417913	1.08441	0.688703	0.555033	0.523128	0.417913	0.418513	0.462269	0.573136	0.479122
08055500	2.43909	0.342951	1.12485	0.651398	0.46747	0.424764	0.342951	0.350153	0.377707	0.470521	0.39801
08085500	2.10477	0.287343	1.09216	0.567285	0.392759	0.362704	0.287343	0.294344	0.311947	0.40016	0.364955
08095000	2.21234	0.314945	1.13887	0.624389	0.431286	0.391656	0.314945	0.320548	0.343674	0.428128	0.368938
08103800	2.079	0.305441	1.17534	0.613127	0.414953	0.388417	0.305441	0.309582	0.329379	0.411864	0.373675
08146000	2.34606	0.319702	1.09017	0.610919	0.432618	0.403431	0.319702	0.328927	0.351101	0.441303	0.395177
08150000	2.21098	0.307073	1.11109	0.603164	0.415321	0.384548	0.307073	0.311314	0.336269	0.420051	0.384548
08150700	2.46519	0.348607	1.1313	0.640595	0.456583	0.456583	0.348607	0.355957	0.380637	0.469921	0.436621
08167500	2.11968	0.293444	1.1075	0.575286	0.40141	0.366705	0.293444	0.300945	0.321148	0.407411	0.367255
08171000	1.93926	0.275891	1.13813	0.568385	0.379857	0.343552	0.275891	0.279642	0.299695	0.379457	0.342301
08171300	1.93613	0.280151	1.15757	0.572239	0.38362	0.348224	0.280151	0.284879	0.303374	0.383088	0.352715
08172000	1.98523	0.279042	1.12447	0.546882	0.378757	0.345902	0.279042	0.285593	0.302695	0.385508	0.349002
08189500	1.93359	0.273241	1.1305	0.546382	0.372306	0.336	0.273241	0.277442	0.294944	0.377907	0.338351
08205500	2.51845	0.339201	1.07749	0.628094	0.452468	0.424214	0.339201	0.345902	0.372156	0.46562	0.421213
08340500	2.81146	0.375185	1.06759	0.649756	0.48866	0.484632	0.375185	0.382322	0.411503	0.513177	0.463718
09127998	0	0		0	0	0	0	0	0	0	0
09132500	3.30223	0.429564	1.04067	0.660099	0.564285	0.546582	0.437616	0.429564	0.482572	0.604391	0.514727
09251000	3.96942	0.509476	1.0268	0.693004	0.627244	0.649497	0.510127	0.509476	0.553433	0.700205	0.608491
09292500	2.88518	0.389708	1.08058	0.652898	0.511977	0.485123	0.391409	0.389708	0.434015	0.53538	0.462319
09299500	2.8687	0.382407	1.06643	0.6666	0.516878	0.488473	0.392259	0.382407	0.434665	0.537581	0.458069
09430500	2.81098	0.356653	1.01503	0.610692	0.46727	0.453418	0.356653	0.362654	0.388958	0.494524	0.455918
09431500	2.83211	0.360378	1.01798	0.624083	0.468922	0.46508	0.360378	0.366514	0.392259	0.499656	0.459232
09442692	2.85809	0.380543	1.06517	0.661538	0.495023	0.508597	0.380543	0.382715	0.417285	0.518009	0.488054
09444500	3.00937	0.372806	0.991054	0.620593	0.484323	0.478122	0.372806	0.383257	0.405711	0.520928	0.479972
09497500	3.1573	0.391109	0.990995	0.645097	0.505176	0.503826	0.391109	0.40026	0.424464	0.539581	0.497575
10296000	2.03157	0.273581	1.07732	0.541206	0.379157	0.345193	0.273581	0.277315	0.299521	0.379763	0.356144
10296500	2.01406	0.272217	1.08127	0.524994	0.372917	0.347984	0.272217	0.276745	0.299626	0.379196	0.35559
10301500	2.04221	0.273791	1.07253	0.53118	0.373356	0.344902	0.273791	0.277142	0.297845	0.382007	0.356904
10309000	2.08021	0.277442	1.06698	0.53038	0.379257	0.350803	0.277442	0.280242	0.304896	0.384708	0.358454
10312000	1.99131	0.265892	1.06821	0.512734	0.366646	0.336237	0.265892	0.270731	0.289425	0.371536	0.347086
11025500	1.327	0.184578	1.11275	0.460569	0.289843	0.243236	0.184578	0.188978	0.20003	0.254688	0.250638
11080500	1.10379	0.164712	1.1938	0.40583	0.265005	0.241721	0.164712	0.168075	0.178769	0.222146	0.223784
11138500	1.29543	0.17774	1.09764	0.426302	0.286136	0.237268	0.17774	0.178162	0.192781	0.242018	0.231886
11160000	1.5412	0.207018	1.07458	0.468559	0.316011	0.275385	0.207018	0.208455	0.223896	0.284383	0.269315
11210500	1.44387	0.23417	1.29746	0.508961	0.325169	0.398447	0.23417	0.23875	0.255476	0.307248	0.303863
11213500	1.53854	0.215963	1.12295	0.473054	0.317759	0.301371	0.215963	0.22203	0.235975	0.29751	0.287031
11222000	1.4746	0.24027	1.30351	0.504777	0.326264	0.430436	0.24027	0.249592	0.261478	0.312981	0.314146
11224500	1.33537	0.183177	1.09739	0.434965	0.293294	0.243086	0.183177	0.183528	0.20013	0.252088	0.237436
11281000	1.793	0.237469	1.05954	0.512123	0.347749	0.306999	0.237469	0.240882	0.25815	0.327323	0.310004
11342000	2.43155	0.315014	1.03642	0.626899	0.429927	0.408781	0.315014	0.317991	0.346001	0.433207	0.40868
11355500	2.40792	0.323625	1.0752	0.66276	0.438998	0.419168	0.323625	0.324868	0.353934	0.440656	0.409756
11401500	2.00882	0.269848	1.07465	0.536822	0.376841	0.34906	0.269848	0.275117	0.296252	0.374626	0.347743
11403000	2.2147	0.30691	1.10863	0.597287	0.411827	0.427936	0.30691	0.31348	0.337855	0.416384	0.396884
11413000	2.16726	0.282142	1.04147	0.573486	0.395859	0.366805	0.282142	0.287193	0.309396	0.390959	0.360954
11427000	2.24526	0.290244	1.03416	0.59969	0.406561	0.377057	0.290244	0.292594	0.318048	0.39876	0.367655
11497500	2.2478	0.310037	1.10343	0.572087	0.418762	0.401686	0.310037	0.317674	0.340947	0.429858	0.398228
11501000	2.45704	0.32228	1.04933	0.556642	0.427058	0.406836	0.32228	0.330175	0.352689	0.453341	0.407243
11530000	2.60472	0.33175	1.01892	0.625794	0.450118	0.432615	0.33175	0.33485	0.362154	0.458369	0.423664
11532500	2.9769	0.379107	1.0188	0.684303	0.505026	0.493924	0.379607	0.379107	0.417713	0.523429	0.46932
12027500	4.25073	0.53063	0.998662	0.763314	0.671401	0.703606	0.53623	0.53063	0.580887	0.73416	0.650798
12098500	4.33248	0.546082	1.00835	0.768715	0.686553	0.718108	0.553483	0.546082	0.604291	0.761664	0.655748
12134500	4.19681	0.528829	1.00806	0.745012	0.6645	0.691454	0.53348	0.528829	0.580437	0.73526	0.640796
12144500	4.24645	0.540277	1.01784	0.7643	0.678281	0.713123	0.544562	0.540277	0.592758	0.744115	0.648717
12149000	4.22435	0.53373	1.01077	0.759314	0.673351	0.701305	0.540731	0.53373	0.585888	0.741161	0.647597
12340000	3.64706	0.472671	1.03683	0.671201	0.606691	0.603491	0.482722	0.472671	0.53158	0.665	0.552133
12358500	3.75686	0.488523	1.04028	0.688503	0.622643	0.624294	0.496324	0.488523	0.544982	0.686453	0.567385
12413000	3.43798	0.448167	1.04286	0.6691	0.579087	0.566685	0.450318	0.448167	0.491824	0.623394	0.53038
12413500	3.58453	0.468288	1.04513	0.68409	0.598697	0.606893	0.470035	0.468288	0.514915	0.647205	0.554555
12449500	3.55182	0.47458	1.06893	0.710095	0.601942	0.630337	0.475415	0.47458	0.525003	0.645057	0.569266
12449950	3.56088	0.46271	1.03954	0.708163	0.601863	0.598653	0.466297	0.46271	0.515073	0.639877	0.546227
12459000	2.45754	0.322198	1.04885	0.502675	0.417813	0.40321	0.322198	0.3312	0.351103	0.461319	0.39856
12462500	2.53954	0.335592	1.05718	0.519097	0.432512	0.426557	0.335592	0.345791	0.365708	0.476728	0.425804
13186000	2.9857	0.393359	1.05398	0.649997	0.515927	0.496875	0.393359	0.394009	0.435165	0.545732	0.473371
13200000	2.88199	0.381193	1.05814	0.673511	0.513084	0.489128	0.386563	0.381193	0.428	0.531248	0.466804
13298500	2.98417	0.411586	1.10339	0.668912	0.529359	0.55956	0.411586	0.412709	0.458853	0.561918	0.508027
13302500	3.13824	0.411562	1.04915	0.623594	0.53033	0.517678	0.411562	0.416813	0.452068	0.573486	0.500325
13336500	3.89009	0.500825	1.02995	0.708606	0.632945	0.642596	0.505476	0.500825	0.556383	0.696054	0.591389
13337000	3.90527	0.503175	1.03076	0.721608	0.641646	0.650198	0.510127	0.503175	0.558634	0.700255	0.59689
13340500	4.12605	0.546954	1.06049	0.794058	0.684668	0.757805	0.553122	0.546954	0.611153	0.746853	0.649295
13340600	4.37396	0.559839	1.02395	0.773546	0.69358	0.753535	0.567179	0.559839	0.618249	0.772	0.662752
13351000	3.77329	0.48566	1.02968	0.778667	0.646981	0.636908	0.497376	0.48566	0.549011	0.67757	0.559243
14080500	3.13527	0.411102	1.04898	0.658364	0.531322	0.528694	0.411102	0.412479	0.450466	0.567557	0.500344
14101500	3.31539	0.428684	1.03441	0.662076	0.549872	0.558201	0.428684	0.429405	0.47308	0.593547	0.515903
14113000	3.22662	0.411512	1.02029	0.652698	0.53408	0.526729	0.411512	0.412712	0.451918	0.569735	0.495874
14232500	4.01456	0.504664	1.00567	0.724377	0.636333	0.660903	0.51001	0.504664	0.555227	0.697361	0.615231
14233400	3.93917	0.498992	1.01339	0.718639	0.630721	0.653782	0.503972	0.498992	0.548198	0.68959	0.607304
14308000	3.23717	0.412337	1.01901	0.680216	0.538407	0.533771	0.413254	0.412337	0.451915	0.568154	0.500306
14321000	3.27583	0.414273	1.01171	0.661165	0.537286	0.53372	0.414273	0.416667	0.451355	0.574267	0.513855
14359000	3.14686	0.400876	1.01911	0.659841	0.524042	0.514161	0.400876	0.401793	0.439385	0.555369	0.490678
