# Supplementary material for: Data compression to define information content of hydrological time series
Source: Copernicus journal article supplement (doi:10.5194/hess-17-3171-2013), 2013-08-06
Supplement: Supplementary file 7 [file results_Q_6bits.xls]

## Sheet: Sheet1
gauge nr	H	Cbest	C/H	WAVPACK	ARJ	PPMD	LZMA	BZIP2	PNG	GIF	TIFF
01048000	5.42789	0.521749	0.576742	0.859333	0.55234	0.801025	0.521749	0.620431	0.566548	0.669578	0.583396
01055500	5.2849	0.463449	0.526158	0.793646	0.500651	0.728267	0.463449	0.563315	0.513052	0.598756	0.53191
01060000	5.11705	0.503151	0.58997	0.850914	0.554052	0.745669	0.503151	0.59097	0.542343	0.667906	0.582429
01064500	5.25026	0.517129	0.590976	0.877686	0.558073	0.767058	0.517129	0.605818	0.556006	0.680303	0.585213
01076500	5.35481	0.575336	0.644657	0.919043	0.603022	0.841055	0.575336	0.663331	0.609026	0.746189	0.616965
01127000	5.11495	0.51281	0.601542	0.836125	0.51281	0.747912	0.51321	0.594823	0.562618	0.674835	0.556483
01138000	5.32409	0.618283	0.696776	0.936009	0.618283	0.912709	0.621293	0.711483	0.651282	0.781717	0.637793
01197500	5.10152	0.57782	0.679586	0.881332	0.580354	0.816256	0.57782	0.654765	0.612959	0.73591	0.597156
01200000	5.30962	0.482385	0.545107	0.819855	0.49351	0.738768	0.482385	0.575809	0.532592	0.620953	0.535373
01321000	5.41258	0.523879	0.580734	0.858662	0.547882	0.77945	0.523879	0.626027	0.574219	0.677035	0.561951
01329000	5.37315	0.625277	0.698223	0.954079	0.631118	0.909466	0.625277	0.707251	0.651259	0.791843	0.646324
01329500	5.36625	0.555118	0.620676	0.876916	0.555118	0.861732	0.57439	0.667105	0.612206	0.702	0.598628
01334500	5.21896	0.556865	0.640203	0.906503	0.583756	0.809512	0.556865	0.648573	0.591582	0.723156	0.59787
01348000	4.89448	0.699388	0.857359	1.05774	0.708814	0.930791	0.699388	0.764752	0.73122	0.939213	0.723494
01361000	5.09194	0.54695	0.644489	0.886309	0.54695	0.873818	0.580024	0.655847	0.619431	0.721819	0.600959
01371500	5.35543	0.540214	0.605234	0.863996	0.560751	0.802187	0.540214	0.642496	0.581621	0.694371	0.570552
01372500	5.14518	0.448334	0.52282	0.789585	0.462803	0.687903	0.448334	0.543081	0.500142	0.583888	0.506143
01421000	5.23728	0.53586	0.613899	0.879924	0.565811	0.779	0.53586	0.624355	0.580277	0.700761	0.584148
01423000	5.44615	0.530301	0.58423	0.877095	0.551852	0.78822	0.530301	0.626196	0.572421	0.68706	0.57881
01426500	5.29048	0.57622	0.653498	0.900935	0.585021	0.832858	0.57622	0.661166	0.627494	0.745512	0.605291
01445000	5.49556	0.531403	0.580181	0.871728	0.531403	0.966772	0.59625	0.693521	0.626446	0.697482	0.58635
01445500	5.44219	0.529079	0.583309	0.867864	0.541281	0.784584	0.529079	0.62356	0.575086	0.683302	0.566018
01500500	5.55116	0.573873	0.620274	0.887532	0.573873	0.860018	0.5842	0.689205	0.619629	0.741143	0.591135
01503000	5.54096	0.525279	0.568796	0.834925	0.535214	0.804254	0.525279	0.637096	0.564951	0.668567	0.559217
01512500	5.5302	0.530813	0.575906	0.855195	0.550616	0.800787	0.530813	0.637696	0.575686	0.684303	0.570286
01514000	5.56204	0.569851	0.614722	0.907251	0.585997	0.86285	0.569851	0.658891	0.604517	0.734989	0.607604
01518000	5.29824	0.525812	0.595457	0.871197	0.549016	0.753113	0.525812	0.601023	0.567085	0.682636	0.57842
01520000	4.88538	0.469258	0.576321	0.801231	0.482857	0.675829	0.469258	0.547849	0.517286	0.623649	0.537041
01520500	5.34638	0.544558	0.611132	0.881048	0.560423	0.798169	0.544558	0.630594	0.588918	0.703844	0.590102
01531000	5.36172	0.506076	0.566321	0.850261	0.539281	0.759114	0.506076	0.604357	0.546215	0.6675	0.569219
01534000	5.31108	0.53368	0.602906	0.8868	0.564085	0.784518	0.53368	0.625294	0.573753	0.693704	0.581154
01541000	5.34267	0.567285	0.637081	0.927606	0.609558	0.825591	0.567285	0.658832	0.600623	0.744845	0.609558
01541500	5.13604	0.50961	0.595334	0.857062	0.540148	0.745712	0.50961	0.601624	0.551416	0.6687	0.564218
01543500	5.36439	0.520411	0.582073	0.861062	0.549549	0.77585	0.520411	0.62236	0.564018	0.673968	0.563885
01548500	5.34362	0.495141	0.555962	0.842126	0.515011	0.745845	0.495141	0.592089	0.539814	0.646764	0.545882
01556000	5.30086	0.564018	0.638407	0.925872	0.596956	0.814322	0.564018	0.649831	0.598623	0.750246	0.611958
01558000	5.02363	0.491474	0.586994	0.865063	0.53208	0.718241	0.491474	0.574419	0.530813	0.661833	0.561684
01559000	4.90458	0.525812	0.64325	0.875598	0.545348	0.742711	0.525812	0.605291	0.565085	0.694371	0.572419
01560000	5.46017	0.55515	0.610036	0.910137	0.589422	0.822323	0.55515	0.648431	0.590222	0.732577	0.601357
01562000	5.35209	0.508343	0.569881	0.855062	0.549349	0.760381	0.508343	0.604424	0.544015	0.673701	0.572686
01567000	5.23603	0.50781	0.581902	0.827858	0.517611	0.746912	0.50781	0.604691	0.549549	0.662566	0.551016
01574000	5.11318	0.538214	0.631561	0.892267	0.572953	0.77485	0.538214	0.624427	0.573486	0.705573	0.593689
01595000	5.32332	0.621007	0.699947	0.959609	0.635293	0.881075	0.621007	0.708459	0.650289	0.799937	0.636398
01606500	5.20772	0.48885	0.563221	0.847459	0.529126	0.732098	0.48885	0.584281	0.531479	0.650923	0.557845
01608500	5.20376	0.463245	0.534126	0.82047	0.506289	0.710991	0.463245	0.558606	0.507604	0.620128	0.54269
01610000	5.37572	0.513344	0.572958	0.850928	0.548282	0.764115	0.513344	0.609491	0.552483	0.671101	0.569419
01611500	5.29831	0.480327	0.543941	0.834947	0.529637	0.734917	0.480327	0.57556	0.521172	0.63792	0.562228
01628500	5.03676	0.435999	0.51938	0.804387	0.476938	0.6643	0.435999	0.516544	0.478538	0.586088	0.527946
01631000	4.99355	0.454201	0.545746	0.80252	0.483539	0.685836	0.454201	0.543081	0.495341	0.613559	0.531346
01634000	5.0134	0.452868	0.541989	0.813055	0.491274	0.685703	0.452868	0.537014	0.494541	0.609225	0.540081
01643000	5.08982	0.531346	0.626364	0.889467	0.571152	0.764915	0.531346	0.608958	0.565218	0.699905	0.593089
01649500	4.83419	0.603085	0.748525	1.00244	0.657029	0.825352	0.603085	0.665127	0.636482	0.810026	0.670682
01663500	4.87354	0.478164	0.588687	0.826883	0.498787	0.712763	0.478164	0.557722	0.524546	0.618858	0.5393
01664000	4.99628	0.48634	0.584042	0.840526	0.512944	0.721375	0.48634	0.570886	0.53368	0.639363	0.551083
01667500	4.77241	0.473377	0.595142	0.827085	0.500611	0.687109	0.473377	0.549443	0.513108	0.620619	0.541633
01668000	4.94654	0.483206	0.586114	0.839193	0.520745	0.711173	0.483206	0.565485	0.525612	0.637629	0.55855
01672500	5.08352	0.522269	0.616425	0.853034	0.545234	0.768362	0.522269	0.610536	0.562257	0.686624	0.575831
01674500	4.8659	0.404553	0.498843	0.717348	0.423555	0.644176	0.404553	0.501632	0.459553	0.533831	0.473441
02016000	5.20681	0.498075	0.57395	0.870531	0.567952	0.741311	0.498075	0.587955	0.533347	0.674101	0.587822
02018000	5.3123	0.473071	0.534312	0.837459	0.530946	0.726842	0.473071	0.566818	0.514277	0.636962	0.562751
02030500	4.74028	0.494223	0.625562	0.863019	0.527757	0.717579	0.494223	0.565034	0.531882	0.657004	0.572902
02055000	5.08846	0.501942	0.59186	0.860529	0.536747	0.738511	0.501942	0.586488	0.546815	0.6647	0.567885
02058400	4.54077	0.492054	0.650181	0.859562	0.51906	0.711352	0.492054	0.55544	0.53131	0.64973	0.577713
02083500	5.29494	0.484545	0.549066	0.788236	0.505352	0.748224	0.484545	0.592111	0.525491	0.632857	0.539495
02102000	5.29919	0.618493	0.700287	0.951076	0.642363	0.8858	0.618493	0.699305	0.648764	0.810655	0.651231
02116500	4.83722	0.529013	0.656178	0.877198	0.559817	0.750113	0.529013	0.601357	0.566285	0.699438	0.589355
02118000	4.4997	0.455668	0.607598	0.812122	0.485806	0.657765	0.455668	0.523812	0.494808	0.612825	0.540681
02121000	0	0		0	0	0	0	0	0	0	0
02126000	5.29956	0.605091	0.685065	0.981347	0.6651	0.872598	0.605091	0.683769	0.629694	0.796453	0.671301
02135000	5.52994	0.332247	0.360489	0.637598	0.376732	0.62646	0.332247	0.44492	0.39765	0.423458	0.423662
02138500	4.85022	0.505542	0.625386	0.875198	0.544948	0.723975	0.505542	0.588088	0.546282	0.679302	0.57562
02143000	4.70436	0.548282	0.699286	0.912537	0.575686	0.753313	0.548282	0.59909	0.586421	0.729576	0.612425
02143040	4.69764	0.496917	0.634681	0.870785	0.531998	0.720846	0.496917	0.561024	0.542682	0.662259	0.587112
02143500	4.48471	0.47422	0.63445	0.84282	0.502376	0.672598	0.47422	0.534177	0.513095	0.639583	0.562833
02156500	4.46052	0.568779	0.765085	0.891196	0.578814	0.769398	0.568779	0.622757	0.598744	0.752305	0.599782
02165000	4.72926	0.625849	0.794014	0.987503	0.648941	0.830956	0.625849	0.660758	0.658992	0.837612	0.674273
02174000	0	0		0	0	0	0	0	0	0	0
02192000	4.72932	0.455135	0.577422	0.808521	0.48774	0.670034	0.455135	0.529346	0.494474	0.609825	0.541014
02202000	0	0		0	0	0	0	0	0	0	0
02202500	5.50207	0.336784	0.367262	0.643163	0.367789	0.614826	0.336784	0.447467	0.405794	0.430665	0.41893
02217500	4.85307	0.495141	0.612158	0.837592	0.514077	0.716841	0.495141	0.569819	0.534547	0.653831	0.55835
02218500	4.98149	0.527469	0.635314	0.840293	0.527469	0.796605	0.532574	0.613777	0.564509	0.68026	0.570445
02219500	4.88112	0.520345	0.639623	0.842905	0.532455	0.772386	0.520345	0.596326	0.55703	0.658891	0.572938
02228000	5.52838	0.332983	0.36139	0.650498	0.386525	0.621026	0.332983	0.443333	0.395126	0.429331	0.429664
02236000	2.66174	0.290045	0.653807	0.629503	0.383543	0.399599	0.290045	0.332261	0.325686	0.435448	0.465206
02273000	5.15122	0.459739	0.535492	0.782034	0.493166	0.682653	0.459739	0.517942	0.519949	0.623966	0.53988
02296750	5.19957	0.399993	0.461569	0.71344	0.418396	0.651764	0.399993	0.503342	0.458402	0.526479	0.461736
02329000	5.39192	0.37719	0.419728	0.697305	0.412262	0.650164	0.37719	0.487873	0.436199	0.49054	0.457869
02339500	5.19747	0.661833	0.764025	1.04709	0.685436	0.882532	0.661833	0.693237	0.690837	0.849927	0.701772
02347500	5.00746	0.464336	0.556374	0.796519	0.489607	0.696705	0.464336	0.554416	0.510677	0.607691	0.526346
02349500	5.07735	0.426397	0.503882	0.741711	0.466003	0.675168	0.426397	0.528679	0.466603	0.563351	0.51101
02365500	5.18256	0.436345	0.505169	0.734194	0.472483	0.701773	0.436345	0.544003	0.477921	0.555911	0.516469
02375500	5.3912	0.502742	0.559514	0.797453	0.511477	0.766382	0.502742	0.611692	0.541081	0.638029	0.541748
02383500	5.19531	0.596879	0.689328	0.922079	0.596879	0.839692	0.600207	0.66867	0.643132	0.772723	0.620311
02387000	5.23398	0.553083	0.63403	0.884799	0.589622	0.807321	0.553083	0.645097	0.584688	0.723842	0.602957
02387500	5.41734	0.593889	0.657764	0.905736	0.60129	0.866463	0.593889	0.680635	0.628428	0.768449	0.619093
02414500	5.19612	0.633659	0.731692	0.949334	0.653898	0.876528	0.633659	0.679775	0.681812	0.827221	0.678484
02437000	5.36701	1.33333	1.49059	1.9548	1.33333	5.88136	1.85876	1.82486	1.94915	1.86441	1.89266
02448000	4.13087	0.367676	0.534041	0.762878	0.421594	0.544932	0.367676	0.442039	0.418454	0.523886	0.487606
02456500	5.51888	0.534705	0.581319	0.877886	0.576881	0.806167	0.534705	0.63298	0.571448	0.693494	0.584827
02472000	5.33469	0.53488	0.601587	0.877598	0.581754	0.789318	0.53488	0.627027	0.561951	0.71004	0.598423
02475000	5.42772	0.500808	0.553612	0.823457	0.546282	0.763915	0.500808	0.606491	0.536681	0.654231	0.563685
02475500	5.28068	0.536414	0.609483	0.867864	0.574953	0.794786	0.536414	0.629028	0.571086	0.695238	0.587088
02478500	5.55775	0.483272	0.521728	0.792119	0.514277	0.762514	0.483272	0.594156	0.527212	0.624827	0.545815
02479300	5.25945	0.563242	0.642549	0.895935	0.608988	0.833674	0.563242	0.648459	0.586941	0.727648	0.626081
02482000	5.4209	0.426384	0.471933	0.750676	0.445534	0.690021	0.426384	0.53001	0.482835	0.556834	0.490508
02486000	5.46661	0.507845	0.557397	0.826582	0.514135	0.767648	0.507845	0.601306	0.561652	0.664274	0.560216
02492000	4.84105	0.462691	0.57346	0.796388	0.506496	0.691268	0.462691	0.543866	0.489957	0.626148	0.547395
03010500	5.26796	0.491274	0.559541	0.832525	0.515144	0.744445	0.491274	0.593022	0.540081	0.64423	0.544948
03011020	5.44608	0.520611	0.573562	0.853595	0.552216	0.782251	0.520611	0.626094	0.565285	0.672301	0.564218
03020500	5.44837	0.609225	0.670907	0.966678	0.648164	0.883866	0.609225	0.699438	0.635962	0.79952	0.647164
03024000	5.6356	0.554883	0.590762	0.860529	0.580887	0.847994	0.554883	0.6641	0.587755	0.704906	0.586888
03032500	5.42622	0.556817	0.615696	0.900935	0.591955	0.826724	0.556817	0.658832	0.595223	0.719041	0.593022
03050500	5.04856	0.562332	0.668308	0.894472	0.592923	0.799239	0.562332	0.654243	0.599637	0.735773	0.596591
03051000	5.24274	0.579782	0.663526	0.907804	0.616045	0.843446	0.579782	0.676113	0.613	0.752029	0.607671
03054500	5.32625	0.567187	0.638934	0.893825	0.602758	0.839224	0.567187	0.669746	0.599574	0.73016	0.599505
03065000	5.14249	0.561363	0.65497	0.909505	0.600547	0.802965	0.561363	0.651099	0.59624	0.729538	0.597017
03069000	5.04374	0.573625	0.68238	0.916451	0.61638	0.821291	0.573625	0.658586	0.603907	0.746764	0.613085
03069500	5.24493	0.587464	0.672036	0.937423	0.634591	0.852511	0.587464	0.680057	0.615699	0.760333	0.621235
03070000	5.19251	0.571043	0.659847	0.910704	0.610955	0.826613	0.571043	0.663597	0.602643	0.737953	0.605189
03075500	5.36768	0.586488	0.655577	0.935207	0.625027	0.854395	0.586488	0.677768	0.620226	0.75558	0.615692
03079000	5.39876	0.579154	0.643651	0.926539	0.611692	0.84626	0.579154	0.673301	0.612559	0.745579	0.608491
03109500	5.39803	0.552483	0.614094	0.896268	0.590622	0.816589	0.552483	0.643697	0.588355	0.713107	0.59969
03111500	5.30561	0.564685	0.638589	0.926406	0.595223	0.82019	0.564685	0.649231	0.602224	0.734243	0.611025
03114500	5.35965	0.558639	0.625383	0.904281	0.61185	0.823547	0.558639	0.648777	0.59159	0.729969	0.609327
03136000	5.57271	0.590472	0.635746	0.91562	0.590472	0.888533	0.592498	0.690501	0.631422	0.751393	0.611906
03155500	5.31975	0.558633	0.630068	0.911274	0.614856	0.82655	0.558633	0.649136	0.594475	0.735578	0.612513
03159500	5.45564	0.546082	0.60057	0.883599	0.585354	0.815922	0.546082	0.639429	0.582221	0.712974	0.59909
03161000	4.81597	0.517303	0.644485	0.877375	0.55131	0.737948	0.517303	0.59792	0.556778	0.689471	0.582717
03164000	4.98018	0.529813	0.638306	0.873864	0.564218	0.759914	0.529813	0.616893	0.563885	0.694704	0.585888
03165500	4.92438	0.625414	0.762022	0.945387	0.625414	0.896528	0.646089	0.729081	0.663156	0.825531	0.638678
03167000	5.06683	0.511343	0.605519	0.877465	0.559351	0.749246	0.511343	0.595623	0.544015	0.685169	0.586955
03168000	5.02077	0.609691	0.728603	0.93294	0.609691	0.850861	0.611158	0.701372	0.637429	0.793319	0.619893
03173000	5.30637	0.505676	0.571776	0.867063	0.561884	0.75738	0.505676	0.60029	0.543415	0.675101	0.583954
03175500	5.34598	0.51782	0.58117	0.867743	0.562104	0.772723	0.51782	0.612501	0.557078	0.679673	0.578473
03179000	5.41817	0.564237	0.624828	0.894806	0.603521	0.83246	0.564237	0.661356	0.591372	0.719337	0.610505
03180500	5.14399	0.526232	0.613801	0.871087	0.56316	0.77415	0.526232	0.618979	0.567492	0.688362	0.576227
03182500	5.3797	0.543702	0.606393	0.896087	0.591739	0.802506	0.543702	0.640883	0.577065	0.709062	0.594577
03183500	5.50649	0.542274	0.590875	0.890227	0.598606	0.821439	0.542274	0.643587	0.578398	0.706839	0.599713
03184000	5.5266	0.533486	0.579183	0.880815	0.589678	0.810159	0.533486	0.636944	0.56954	0.699157	0.592862
03186500	5.19645	0.566634	0.654255	0.920399	0.613484	0.812373	0.566634	0.657982	0.601512	0.736389	0.606633
03198500	5.20126	0.516531	0.595853	0.853549	0.550025	0.76663	0.516531	0.609609	0.557776	0.669746	0.570509
03199000	5.14945	0.532121	0.620013	0.864784	0.547121	0.798033	0.532121	0.619037	0.571457	0.678338	0.573245
03213000	5.38149	0.569021	0.63442	0.896952	0.587658	0.852441	0.569021	0.662007	0.604808	0.719504	0.60114
03214000	5.33442	0.547046	0.615301	0.869742	0.575863	0.82961	0.547046	0.63988	0.581955	0.696741	0.589982
03237500	5.22665	0.538881	0.618616	0.911203	0.597356	0.783851	0.538881	0.62296	0.576887	0.715774	0.606558
03238500	5.27658	0.590755	0.671748	0.969345	0.645564	0.843927	0.590755	0.6675	0.623494	0.792052	0.655032
03251500	3.99402	0.360268	0.541211	0.733622	0.416572	0.538385	0.360268	0.430952	0.410409	0.493495	0.476984
03252500	5.5107	0.524041	0.570571	0.873324	0.58042	0.798204	0.524041	0.616184	0.568785	0.687399	0.5894
03253500	5.39263	0.521529	0.580269	0.842162	0.546047	0.772209	0.521529	0.619193	0.571244	0.676243	0.56649
03265000	5.42281	0.546415	0.604574	0.906003	0.596623	0.816789	0.546415	0.641763	0.57862	0.725109	0.612692
03266000	5.56512	0.536747	0.57869	0.8864	0.588488	0.819923	0.536747	0.637829	0.570086	0.717041	0.606491
03269500	4.95101	0.508476	0.616209	0.880665	0.538747	0.724042	0.508476	0.580754	0.549949	0.688037	0.58002
03274000	5.49672	0.562351	0.61384	0.906403	0.594889	0.834258	0.562351	0.661032	0.597423	0.738444	0.604424
03281500	5.09354	0.482206	0.56802	0.823825	0.521258	0.724939	0.482206	0.576134	0.526759	0.639636	0.548085
03289500	5.35935	0.51696	0.578757	0.863547	0.56132	0.773817	0.51696	0.611451	0.555333	0.675286	0.573943
03301500	5.36721	0.529815	0.59228	0.853844	0.569139	0.79041	0.529815	0.629584	0.567848	0.690913	0.583741
03303000	5.47434	0.518478	0.568263	0.881732	0.575486	0.785718	0.518478	0.612359	0.557417	0.678502	0.590222
03308500	5.50553	0.55397	0.603724	0.871957	0.571478	0.807806	0.55397	0.642342	0.598536	0.709469	0.591616
03324300	5.57788	0.616056	0.662677	0.951512	0.654094	0.899459	0.616056	0.706707	0.639199	0.807447	0.665065
03326500	5.17071	0.534614	0.620356	0.889733	0.581621	0.774249	0.534614	0.621026	0.567885	0.717641	0.604157
03328500	5.38264	0.516211	0.575417	0.873198	0.579687	0.771849	0.516211	0.609825	0.548816	0.685303	0.595356
03331500	5.49912	0.431465	0.470764	0.747045	0.453535	0.698105	0.431465	0.536414	0.481672	0.559351	0.495874
03339500	5.35227	0.508743	0.57031	0.863063	0.562484	0.758981	0.508743	0.601557	0.549416	0.667433	0.57762
03345500	5.35241	0.45273	0.507507	0.784298	0.478946	0.704089	0.45273	0.546591	0.505433	0.600652	0.520579
03346000	5.32093	0.513787	0.579358	0.870551	0.572399	0.765349	0.513787	0.60201	0.551277	0.68514	0.592842
03348000	5.25737	0.55759	0.636352	0.897187	0.585917	0.815959	0.55759	0.643208	0.590704	0.730261	0.60786
03349000	5.30994	0.533347	0.602658	0.86893	0.57742	0.788518	0.533347	0.625494	0.561818	0.698571	0.593889
03361500	5.34962	0.504742	0.566106	0.865997	0.562551	0.758714	0.504742	0.593156	0.540814	0.671834	0.584888
03361650	5.096	0.491552	0.57875	0.818315	0.520338	0.750834	0.491552	0.586254	0.53859	0.638715	0.564143
03362500	5.35759	0.498008	0.557722	0.861196	0.559617	0.75338	0.498008	0.591155	0.540081	0.664366	0.578753
03363000	5.37486	0.484803	0.541189	0.829422	0.535286	0.755825	0.484803	0.574671	0.523604	0.631996	0.563156
03364000	5.44583	0.486486	0.535991	0.821059	0.535115	0.746442	0.486486	0.580997	0.523192	0.641951	0.563716
03365500	5.53004	0.479139	0.519857	0.831191	0.536214	0.744245	0.479139	0.574886	0.519811	0.636562	0.561684
03381500	5.34195	0.455447	0.511551	0.782124	0.49837	0.715431	0.455447	0.556167	0.507946	0.60724	0.537014
03410500	5.42363	0.539595	0.596938	0.892556	0.594336	0.807933	0.539595	0.635697	0.575795	0.710065	0.598886
03438000	5.3501	0.477384	0.535373	0.851127	0.526352	0.733836	0.477384	0.563977	0.51922	0.630603	0.558136
03443000	4.99531	0.523812	0.629164	0.881065	0.550883	0.75358	0.523812	0.609825	0.559751	0.69097	0.577887
03448000	4.94756	0.527811	0.640086	0.868234	0.542787	0.774634	0.527811	0.608588	0.566	0.678039	0.582099
03451500	5.04621	0.517344	0.615128	0.865463	0.542615	0.756113	0.517344	0.604757	0.557084	0.675768	0.571819
03455000	5.18554	0.555073	0.642254	0.894795	0.580629	0.80368	0.555073	0.650345	0.591805	0.71863	0.592146
03465500	4.98201	0.548366	0.660415	0.898744	0.577482	0.796076	0.548366	0.633564	0.582589	0.710072	0.59325
03470000	5.19212	0.623925	0.721006	0.981568	0.654699	0.89587	0.623925	0.702463	0.648395	0.798312	0.659401
03473000	5.1955	0.536214	0.619244	0.898668	0.582154	0.779984	0.536214	0.62476	0.569952	0.70804	0.592489
03490000	5.33474	0.562579	0.632734	0.888316	0.588453	0.850525	0.562579	0.656306	0.593499	0.712994	0.610033
03504000	5.23183	0.546882	0.627179	0.93414	0.591755	0.798186	0.546882	0.628428	0.580887	0.716374	0.603357
03512000	5.23803	0.580436	0.664871	0.956313	0.621146	0.834116	0.580436	0.662125	0.612196	0.764606	0.630768
03521500	5.28629	0.584519	0.663436	0.927186	0.610226	0.853389	0.584519	0.671957	0.612936	0.754935	0.619931
03524000	5.33226	0.537747	0.605087	0.890667	0.588088	0.798453	0.537747	0.634295	0.572419	0.703706	0.597223
03528000	5.39089	0.528478	0.58819	0.85825	0.573451	0.812829	0.528478	0.627293	0.563775	0.67997	0.585097
03531500	5.30861	0.539748	0.610044	0.905202	0.593756	0.790652	0.539748	0.629761	0.575886	0.71244	0.600223
03532000	5.37247	0.521918	0.58288	0.853527	0.563045	0.804247	0.521918	0.620657	0.553368	0.671908	0.584728
03540500	5.16925	0.462183	0.53646	0.809335	0.48879	0.718135	0.462183	0.554816	0.511008	0.607404	0.528746
03550000	5.15588	0.525479	0.61151	0.904669	0.568685	0.766115	0.525479	0.608558	0.562884	0.694237	0.586355
03567500	5.20707	0.580427	0.668813	0.936848	0.618634	0.854866	0.580427	0.654331	0.604552	0.761967	0.641231
03574500	5.33914	0.501698	0.563796	0.859957	0.561328	0.752785	0.501698	0.591212	0.539663	0.667889	0.57464
03603000	5.45202	0.524031	0.5767	0.842665	0.560197	0.813461	0.524031	0.62257	0.560391	0.6745	0.581762
04073500	5.43498	0.359187	0.396529	0.6685	0.364721	0.618759	0.359187	0.456735	0.42213	0.468804	0.425197
04079000	5.34185	0.362854	0.40756	0.662499	0.389392	0.628628	0.362854	0.466403	0.418063	0.46847	0.437466
04100500	4.87607	0.413995	0.509421	0.743445	0.415196	0.628761	0.413995	0.491874	0.46627	0.548416	0.480205
04113000	5.33763	0.570905	0.641751	0.877886	0.570905	0.841687	0.57756	0.674137	0.606697	0.745314	0.588291
04115000	5.48017	0.370385	0.405519	0.692817	0.402038	0.639158	0.370385	0.472678	0.426898	0.483274	0.448973
04144000	5.44657	0.49685	0.547335	0.794144	0.49685	0.818017	0.520315	0.628663	0.561328	0.643457	0.537047
04164000	5.23948	0.629652	0.721047	0.968487	0.635221	0.877547	0.629652	0.704971	0.664765	0.818867	0.653423
04165500	5.3088	0.612877	0.692673	0.949334	0.62483	0.87028	0.612877	0.693697	0.645205	0.801277	0.640247
04176500	5.39775	0.487843	0.542273	0.790954	0.499185	0.748778	0.487843	0.591144	0.52737	0.628634	0.536946
04178000	5.6069	0.482806	0.516655	0.796386	0.519345	0.763314	0.482806	0.593489	0.528479	0.623827	0.548616
04183500	5.68709	0.603418	0.636618	0.906139	0.603418	0.938828	0.622371	0.733003	0.650375	0.77847	0.619283
04185000	5.46336	0.485206	0.532866	0.792652	0.516011	0.757314	0.485206	0.591289	0.529079	0.623694	0.548882
04191500	5.31172	0.610092	0.689146	0.950009	0.630295	0.867463	0.610092	0.68917	0.649297	0.805521	0.653831
04198000	5.48689	0.526946	0.576223	0.862529	0.577753	0.79912	0.526946	0.633228	0.560217	0.69177	0.590022
04201500	5.37416	0.631828	0.705407	0.983214	0.6679	0.895334	0.631828	0.709706	0.659699	0.825524	0.6673
04212000	5.28247	0.534971	0.607638	0.830024	0.544251	0.817878	0.534971	0.6406	0.57564	0.670624	0.567588
04221000	5.42841	0.585525	0.647179	0.924141	0.595813	0.87967	0.585525	0.680329	0.621145	0.744932	0.620814
04221500	5.35591	0.556785	0.623743	0.886431	0.556785	0.85413	0.568584	0.661504	0.60767	0.708702	0.59233
04223000	5.29661	0.579754	0.656745	0.918671	0.59929	0.833192	0.579754	0.667367	0.615092	0.761581	0.614092
05053000	4.77548	0.304779	0.38293	0.617293	0.35592	0.515277	0.304779	0.385925	0.354787	0.414195	0.407928
05244000	5.06958	0.339869	0.402245	0.63869	0.340358	0.565634	0.339869	0.422943	0.402175	0.445748	0.397614
05280000	5.60284	0.292777	0.313531	0.604491	0.315781	0.55535	0.292777	0.383324	0.360587	0.379124	0.364588
05320500	5.48733	0.346259	0.378609	0.668074	0.368505	0.599825	0.346259	0.437304	0.408878	0.451517	0.419383
05383000	4.27058	0.505316	0.709948	0.867172	0.505316	0.764472	0.529707	0.57865	0.562603	0.699162	0.581217
05408000	4.41798	0.493941	0.670814	0.861196	0.510343	0.671834	0.493941	0.542748	0.529346	0.668167	0.569152
05410490	4.56902	0.399393	0.52448	0.73171	0.407795	0.593822	0.399393	0.46467	0.441533	0.539948	0.482872
05410500	0	0		0	0	0	0	0	0	0	0
05412500	5.27	0.453001	0.515751	0.796786	0.465536	0.691037	0.453001	0.534213	0.503476	0.600157	0.524812
05418500	5.0393	0.504409	0.60057	0.835325	0.504409	0.732043	0.506409	0.581621	0.549416	0.669234	0.553283
05422000	5.44315	0.42553	0.469064	0.742911	0.429198	0.683036	0.42553	0.521078	0.485473	0.553883	0.492007
05430500	5.26125	0.419396	0.478285	0.746112	0.419396	0.667633	0.431731	0.514277	0.49014	0.57882	0.487273
05435500	5.22521	0.440981	0.506369	0.73825	0.44166	0.682491	0.440981	0.528185	0.487435	0.568595	0.502717
05440000	5.43145	0.477588	0.52758	0.804129	0.502309	0.736824	0.477588	0.574844	0.519899	0.61994	0.540274
05447500	5.44725	0.46122	0.508021	0.799104	0.485534	0.718691	0.46122	0.553993	0.51175	0.601399	0.530427
05451500	5.27915	0.414662	0.471283	0.737177	0.414929	0.654698	0.414662	0.499742	0.470071	0.537814	0.474471
05452000	5.14493	0.462574	0.539453	0.8157	0.472286	0.693593	0.462574	0.533307	0.511471	0.616765	0.536321
05454500	5.51905	0.470804	0.511832	0.80132	0.470804	0.738911	0.490674	0.564685	0.545282	0.636696	0.538081
05455500	5.38348	0.492341	0.548724	0.836659	0.518744	0.748112	0.492341	0.578553	0.541415	0.646164	0.558684
05457700	4.75015	0.399061	0.504061	0.715284	0.399061	0.616484	0.401878	0.478352	0.447679	0.526552	0.483568
05458500	5.20786	0.499542	0.575525	0.809188	0.499542	0.745112	0.502675	0.591089	0.543748	0.650231	0.540681
05462000	5.30273	0.443704	0.502048	0.761693	0.443704	0.698836	0.448739	0.532697	0.495826	0.582301	0.501601
05471500	5.3742	0.407461	0.454908	0.740911	0.41993	0.659166	0.407461	0.497875	0.464403	0.535747	0.479939
05472500	5.13557	0.438399	0.512192	0.771582	0.444133	0.673768	0.438399	0.523612	0.49074	0.582487	0.506809
05476500	5.40429	0.352991	0.391901	0.676872	0.352991	0.620113	0.365595	0.453742	0.436015	0.472932	0.423167
05479000	5.60791	0.397326	0.425106	0.716641	0.40166	0.666167	0.397326	0.499142	0.458269	0.515544	0.456869
05481000	5.1112	0.38099	0.447242	0.71144	0.394192	0.614159	0.38099	0.471604	0.437732	0.507409	0.449867
05482500	5.2824	0.381124	0.432899	0.703172	0.391992	0.624827	0.381124	0.474204	0.437799	0.499875	0.451001
05484500	5.51865	0.464403	0.504909	0.783184	0.46947	0.725976	0.464403	0.564951	0.517144	0.604824	0.516678
05502040	5.12146	0.55225	0.646984	0.920417	0.580607	0.797758	0.55225	0.616877	0.59163	0.730493	0.619044
05507500	5.38944	0.51951	0.578364	0.844974	0.566778	0.799329	0.51951	0.609178	0.559855	0.670398	0.588843
05508000	5.37079	0.574219	0.641492	0.920671	0.606091	0.823323	0.574219	0.639029	0.626627	0.75638	0.630228
05514500	5.33015	0.499273	0.562017	0.86944	0.559247	0.759267	0.499273	0.583687	0.542101	0.665697	0.590593
05515500	5.50722	0.459869	0.501017	0.781717	0.481005	0.725442	0.459869	0.564685	0.51121	0.592356	0.519611
05517000	5.34326	0.472671	0.530767	0.788518	0.515411	0.732176	0.472671	0.573886	0.509276	0.615826	0.549682
05517500	5.63464	0.42644	0.454091	0.72849	0.450033	0.713955	0.42644	0.540959	0.477615	0.542176	0.498369
05518000	5.52928	0.381191	0.413642	0.695571	0.407795	0.656565	0.381191	0.490474	0.446867	0.496941	0.456202
05520500	5.41342	0.375034	0.415671	0.696278	0.389976	0.629924	0.375034	0.474328	0.437585	0.49314	0.446007
05526000	5.58047	0.448366	0.482073	0.755281	0.483659	0.734382	0.448366	0.564142	0.497223	0.57909	0.518953
05542000	5.40463	0.463034	0.514041	0.805476	0.493864	0.723405	0.463034	0.55955	0.513699	0.607054	0.531019
05546500	5.55953	0.817891	0.882691	1.21406	0.817891	2.8754	1.23962	1.21619	1.15229	1.12886	1.14803
05552500	5.02059	0.471068	0.562963	0.789052	0.471068	0.698655	0.473716	0.559631	0.523907	0.622929	0.518745
05554500	5.3431	0.442407	0.496798	0.765825	0.467264	0.698044	0.442407	0.538848	0.492597	0.578647	0.51175
05555300	5.53941	0.505323	0.54734	0.811097	0.509582	0.800876	0.505323	0.609844	0.553629	0.626635	0.559104
05555500	5.62769	0.528015	0.562946	0.840212	0.528015	0.857275	0.549074	0.648836	0.595035	0.670817	0.572592
05569500	5.29934	0.472833	0.53535	0.803043	0.49022	0.724124	0.472833	0.561464	0.520035	0.61668	0.538169
05570000	5.38337	0.487028	0.542814	0.810242	0.501087	0.746265	0.487028	0.581364	0.537626	0.635765	0.543806
05582000	5.53199	0.451372	0.489558	0.784705	0.475686	0.719302	0.451372	0.549036	0.50197	0.589242	0.517862
05584500	5.16424	0.469098	0.545015	0.804808	0.4964	0.716042	0.469098	0.559087	0.516843	0.620619	0.541972
05585000	5.39561	0.503532	0.559934	0.833469	0.530359	0.759101	0.503532	0.598071	0.549647	0.662524	0.568256
05592500	5.381	0.457349	0.50996	0.777778	0.463869	0.711831	0.457349	0.545776	0.517115	0.598071	0.52248
05593000	5.44551	0.424205	0.4674	0.740831	0.424477	0.667346	0.424205	0.495789	0.480712	0.549647	0.50034
05594000	5.19943	0.493073	0.568992	0.814724	0.527642	0.740899	0.493073	0.590125	0.535181	0.656208	0.559223
06191500	5.49985	0.370589	0.40429	0.686503	0.374056	0.641029	0.370589	0.470271	0.422797	0.493007	0.423063
06192500	5.33757	0.35732	0.401666	0.669834	0.364721	0.613492	0.35732	0.456202	0.411395	0.474204	0.414862
06225500	5.46334	0.419396	0.460593	0.730243	0.419396	0.696438	0.435065	0.539548	0.488007	0.562818	0.472938
06334500	5.39843	0.466742	0.518752	0.792295	0.469735	0.733046	0.466742	0.558924	0.514172	0.618409	0.526463
06340500	4.77866	0.329313	0.41348	0.658222	0.348423	0.530844	0.329313	0.400639	0.376886	0.450231	0.418202
06359500	5.19479	0.443867	0.512667	0.79692	0.463536	0.678168	0.443867	0.530746	0.487807	0.593756	0.519478
06426500	4.52281	0.405464	0.537892	0.78581	0.456595	0.607951	0.405464	0.466952	0.44632	0.552661	0.516697
06441500	4.19766	0.367722	0.52561	0.745845	0.451668	0.561084	0.367722	0.436332	0.396726	0.496875	0.48754
06446000	0	0		0	0	0	0	0	0	0	0
06454500	4.71117	0.403163	0.513455	0.748853	0.403163	0.63672	0.429712	0.502958	0.482967	0.57347	0.477892
06480000	5.40129	0.313843	0.348632	0.617738	0.322011	0.552474	0.313843	0.394847	0.37881	0.413335	0.39017
06600500	5.19081	0.383124	0.442849	0.720508	0.383124	0.60289	0.385591	0.453801	0.440599	0.510943	0.454401
06606600	5.40381	0.366388	0.406811	0.694371	0.366388	0.618426	0.370522	0.456402	0.436199	0.481339	0.433198
06607200	5.20789	0.429998	0.495399	0.772649	0.429998	0.660299	0.432732	0.501875	0.488673	0.570086	0.499808
06609500	5.12508	0.454868	0.53252	0.80132	0.454868	0.679369	0.458002	0.524612	0.510677	0.603491	0.524812
06799500	4.7886	0.425864	0.533597	0.773583	0.428864	0.62056	0.425864	0.484539	0.470137	0.571152	0.504076
06808500	5.1795	0.46413	0.537655	0.81028	0.46413	0.695591	0.468094	0.530915	0.517007	0.617116	0.533736
06810000	5.24355	0.462736	0.529491	0.796386	0.462736	0.699305	0.463736	0.540481	0.515544	0.603957	0.525946
06811500	4.59362	0.451069	0.589169	0.808473	0.463036	0.649336	0.451069	0.509318	0.491644	0.607317	0.53442
06813000	4.96542	0.475317	0.574353	0.826181	0.475317	0.717008	0.482448	0.54841	0.529819	0.631351	0.54875
06815000	5.04289	0.51321	0.610615	0.862663	0.530613	0.741445	0.51321	0.588222	0.553683	0.682302	0.57942
06817000	5.30204	0.519345	0.587712	0.865463	0.531946	0.762914	0.519345	0.595289	0.564685	0.683569	0.577353
06817500	5.34189	0.541307	0.607994	0.878489	0.548342	0.818332	0.541307	0.614412	0.585965	0.689557	0.586985
06820500	5.1603	0.512677	0.596101	0.845193	0.53408	0.749446	0.512677	0.596356	0.553416	0.674168	0.568019
06847000	4.77805	0.384344	0.482637	0.756193	0.410347	0.589165	0.384344	0.439161	0.436428	0.530991	0.478673
06860000	4.07544	0.371256	0.546575	0.756113	0.430398	0.538347	0.371256	0.42213	0.408395	0.527546	0.494941
06868000	5.17734	0.457348	0.530019	0.79694	0.457348	0.858136	0.505795	0.575336	0.563282	0.612656	0.551924
06869500	5.07699	0.408261	0.482484	0.740511	0.408261	0.630428	0.410395	0.46687	0.463936	0.540214	0.485473
06883000	4.09098	0.381795	0.559957	0.744443	0.403469	0.556341	0.381795	0.442453	0.413503	0.520574	0.476459
06884400	4.93235	0.477975	0.581436	0.816404	0.495233	0.719921	0.477975	0.55572	0.513231	0.630424	0.550296
06884500	5.09259	0.537503	0.633276	0.889831	0.537503	1.02977	0.60394	0.659422	0.638926	0.708543	0.654828
06885500	5.01467	0.477845	0.571736	0.834106	0.494832	0.706487	0.477845	0.541767	0.519566	0.632434	0.560317
06888500	5.02392	0.381914	0.456116	0.752306	0.40092	0.602503	0.381914	0.445966	0.430776	0.511813	0.477468
06890500	5.29757	0.603355	0.683356	0.9457	0.603355	0.950321	0.636628	0.702066	0.674338	0.795046	0.650492
06892000	5.32508	0.511543	0.576379	0.857062	0.535214	0.760514	0.511543	0.596423	0.557284	0.679169	0.579287
06894000	4.81182	0.483204	0.602522	0.83258	0.501624	0.690981	0.483204	0.547909	0.527948	0.642486	0.551191
06897500	5.41489	0.525746	0.582556	0.870397	0.565351	0.77945	0.525746	0.612959	0.567885	0.69037	0.590822
06898000	5.2057	0.485806	0.559932	0.82279	0.504342	0.724175	0.485806	0.570752	0.53248	0.64283	0.55255
06899500	5.28849	0.512077	0.580971	0.861729	0.547549	0.75478	0.512077	0.594422	0.557217	0.677702	0.579487
06908000	5.47002	0.547749	0.60082	0.8892	0.588022	0.817589	0.547749	0.637229	0.588622	0.724709	0.610358
06913500	5.14819	0.484806	0.565021	0.826257	0.48814	0.704372	0.484806	0.549949	0.531413	0.641496	0.549349
06914000	5.48887	0.501494	0.548194	0.878294	0.565879	0.751358	0.501494	0.586322	0.542991	0.677737	0.590668
06928000	5.40401	0.471771	0.523801	0.813847	0.496266	0.757778	0.471771	0.554317	0.522035	0.597926	0.550777
06933500	5.20368	0.406794	0.469047	0.767582	0.461869	0.649097	0.406794	0.489473	0.450934	0.558951	0.517278
07019000	5.24653	0.453401	0.518516	0.803454	0.501275	0.700772	0.453401	0.536547	0.490407	0.610225	0.547415
07029500	5.54141	0.489686	0.530211	0.780846	0.511814	0.792761	0.489686	0.60185	0.533136	0.614123	0.545499
07049000	5.18526	0.465344	0.538462	0.798763	0.474792	0.759942	0.465344	0.544877	0.512583	0.586447	0.546251
07052500	5.08595	0.40126	0.473375	0.773849	0.451934	0.635495	0.40126	0.481739	0.448667	0.539281	0.502009
07056000	5.31325	0.40186	0.453801	0.790785	0.462003	0.643296	0.40186	0.484539	0.448267	0.546282	0.507543
07057500	4.73	0.339384	0.430509	0.726509	0.388858	0.540614	0.339384	0.407061	0.385191	0.474071	0.459536
07058000	4.81571	0.382474	0.476533	0.762346	0.423381	0.599126	0.382474	0.455911	0.431188	0.52699	0.492833
07067000	5.01772	0.387125	0.462909	0.764915	0.437866	0.612092	0.387125	0.461669	0.432865	0.53368	0.501409
07068000	4.90654	0.361988	0.442659	0.732377	0.411662	0.57742	0.361988	0.435999	0.409395	0.503142	0.480205
07069500	4.89947	0.405896	0.497069	0.788209	0.443533	0.625554	0.405896	0.473441	0.448843	0.552465	0.511625
07072000	4.92191	0.3513	0.428248	0.725688	0.380581	0.563456	0.3513	0.412997	0.400076	0.476223	0.454664
07074000	5.19055	0.465554	0.538155	0.84818	0.520996	0.712699	0.465554	0.541923	0.506393	0.634534	0.564256
07144200	5.02155	0.442	0.528123	0.799987	0.476338	0.674234	0.442	0.517278	0.483806	0.598823	0.53628
07144780	4.18473	0.356509	0.511157	0.695967	0.364741	0.536332	0.356509	0.418345	0.400314	0.47626	0.445686
07147070	4.94693	0.452398	0.548702	0.82217	0.477507	0.687724	0.452398	0.518019	0.493979	0.600467	0.553901
07147800	5.07971	0.427597	0.505065	0.779984	0.449467	0.654765	0.427597	0.507209	0.475871	0.573886	0.513544
07152000	4.90702	0.454802	0.556103	0.803854	0.470671	0.671834	0.454802	0.522812	0.496741	0.605558	0.53628
07163000	4.45539	0.452184	0.608949	0.870856	0.514263	0.647277	0.452184	0.500219	0.480431	0.613126	0.577698
07172000	5.2766	0.395326	0.449524	0.765715	0.439199	0.628361	0.395326	0.474338	0.446667	0.53468	0.497275
07177500	5.31226	0.480872	0.543127	0.835592	0.515477	0.710973	0.480872	0.548882	0.529746	0.639229	0.564085
07183000	5.19678	0.459602	0.530639	0.794519	0.459602	0.693504	0.46347	0.538347	0.521412	0.617093	0.524679
07186000	5.08724	0.443467	0.523034	0.816923	0.481539	0.675768	0.443467	0.518878	0.481939	0.599823	0.537881
07196500	4.4828	0.314447	0.420872	0.667834	0.355653	0.497675	0.314447	0.381591	0.354987	0.440799	0.42553
07197000	5.17601	0.370194	0.429126	0.760533	0.422383	0.595853	0.370194	0.445571	0.420085	0.505265	0.48255
07211500	4.92708	0.482624	0.58772	0.829587	0.484781	0.705528	0.482624	0.546661	0.534687	0.649746	0.54629
07221000	5.28224	0.433711	0.492645	0.77457	0.433711	0.692725	0.451533	0.531282	0.513834	0.596204	0.500955
07222500	3.90099	0.36849	0.566763	0.868322	0.470328	0.537646	0.36849	0.408626	0.398592	0.535325	0.521697
07243500	5.22815	0.431331	0.49501	0.756113	0.451534	0.672167	0.431331	0.524412	0.488473	0.574286	0.503342
07252000	5.31124	0.391026	0.441734	0.757691	0.431677	0.636325	0.391026	0.480032	0.444444	0.517455	0.473722
07261000	5.32131	0.457389	0.515725	0.822198	0.498786	0.713229	0.457389	0.546009	0.506087	0.609076	0.539329
07288500	5.33274	0.427947	0.481494	0.746721	0.48941	0.697313	0.427947	0.523027	0.483807	0.555626	0.534827
07289500	5.65952	0.572131	0.606551	0.855584	0.572131	0.894781	0.583199	0.683268	0.610407	0.71355	0.599493
07290000	5.64165	0.498818	0.530502	0.821047	0.524123	0.779212	0.498818	0.603779	0.547591	0.653776	0.561332
07307800	5.05068	0.544371	0.64669	0.900017	0.560291	0.798128	0.544371	0.614902	0.590009	0.723159	0.604868
07340000	5.27181	0.531617	0.605049	0.847736	0.546842	0.772236	0.531617	0.618813	0.583381	0.688431	0.571686
07346000	5.13474	0.35169	0.410953	0.672716	0.35169	0.574468	0.35388	0.413121	0.408323	0.449103	0.444305
07346050	5.30932	0.434161	0.49064	0.756208	0.453066	0.706452	0.434161	0.534801	0.489654	0.56029	0.506584
07346070	5.31137	0.361655	0.408544	0.690507	0.382485	0.614868	0.361655	0.462345	0.424629	0.477431	0.443453
07348000	4.60999	0.355998	0.463339	0.666393	0.381298	0.572767	0.355998	0.441347	0.406911	0.479375	0.450327
07363500	5.48476	0.411505	0.450162	0.72752	0.441796	0.690641	0.411505	0.520171	0.465499	0.541225	0.493548
07375500	4.75002	0.46975	0.593365	0.835418	0.526773	0.683102	0.46975	0.539852	0.497777	0.645664	0.570025
07378000	5.02505	0.581789	0.694667	0.989049	0.661442	0.806906	0.581789	0.640335	0.599713	0.798464	0.673414
07378500	5.10203	0.544973	0.64089	0.906697	0.605733	0.78317	0.544973	0.617083	0.568156	0.741994	0.623726
08013500	5.41498	0.458797	0.508364	0.774165	0.495309	0.734526	0.458797	0.568987	0.504619	0.599025	0.536184
08015500	5.24029	0.470212	0.53838	0.776919	0.495198	0.737253	0.470212	0.573514	0.510034	0.607871	0.53338
08032000	5.13236	0.348452	0.407359	0.6645	0.35792	0.570286	0.348452	0.428998	0.408328	0.456402	0.42153
08033500	5.34999	0.363321	0.407464	0.682502	0.368989	0.611958	0.363321	0.456268	0.431465	0.472604	0.431531
08055500	4.88803	0.566352	0.695191	0.931206	0.573019	0.781451	0.566352	0.612359	0.615826	0.760781	0.613425
08085500	4.91324	0.40046	0.489038	0.766915	0.4438	0.616626	0.40046	0.46827	0.445133	0.541148	0.502742
08095000	5.22201	0.407158	0.467818	0.779136	0.43025	0.63984	0.407158	0.478538	0.461899	0.546047	0.500883
08103800	4.88227	0.434024	0.533388	0.794852	0.434024	0.667275	0.441792	0.502633	0.493179	0.578168	0.520604
08146000	4.55818	0.367861	0.484221	0.711984	0.377068	0.565458	0.367861	0.428571	0.410157	0.496979	0.452956
08150000	4.27886	0.242991	0.340732	0.551224	0.279382	0.390728	0.242991	0.280976	0.287573	0.328748	0.33462
08150700	4.26998	0.330762	0.464774	0.664187	0.340925	0.529535	0.330762	0.383873	0.380607	0.440976	0.433596
08167500	4.67372	0.301979	0.387672	0.641029	0.323248	0.490207	0.301979	0.354653	0.346585	0.406128	0.393059
08171000	4.83446	0.308113	0.382396	0.661299	0.324115	0.496208	0.308113	0.359721	0.35352	0.412128	0.396926
08171300	4.80521	0.315153	0.393514	0.667179	0.338553	0.503851	0.315153	0.37385	0.357935	0.420335	0.417578
08172000	4.72164	0.346319	0.440083	0.724642	0.365255	0.541481	0.346319	0.391525	0.389858	0.465136	0.449334
08189500	4.84575	0.376723	0.466458	0.750779	0.403127	0.577753	0.376723	0.428331	0.415996	0.50881	0.482339
08205500	4.1157	0.276641	0.403297	0.618359	0.343785	0.443667	0.276641	0.327316	0.31278	0.37579	0.407394
08340500	3.54932	0.431192	0.728916	0.973928	0.535764	0.600956	0.431192	0.455216	0.452107	0.597942	0.579006
09127998	0	0		0	0	0	0	0	0	0	0
09132500	5.42445	0.417796	0.462125	0.735444	0.417796	0.692304	0.434665	0.53348	0.483006	0.560284	0.472271
09251000	4.92436	0.348586	0.424728	0.657565	0.351653	0.574153	0.348586	0.440799	0.408528	0.461203	0.401727
09292500	5.1917	0.37559	0.434065	0.675968	0.384391	0.611958	0.37559	0.470271	0.42353	0.503676	0.433665
09299500	5.34598	0.398927	0.447731	0.708106	0.398927	0.652098	0.401794	0.498808	0.456935	0.535614	0.452134
09430500	4.70771	0.347852	0.443339	0.678235	0.362254	0.557017	0.347852	0.425931	0.401927	0.473804	0.432598
09431500	4.90699	0.421713	0.515647	0.75107	0.421713	0.669419	0.435245	0.519419	0.494801	0.577982	0.489602
09442692	2.87988	0.262805	0.547535	0.587149	0.297557	0.410015	0.262805	0.28911	0.297557	0.363318	0.377677
09444500	4.77354	0.40266	0.506115	0.743045	0.405928	0.617826	0.40266	0.472871	0.457669	0.541014	0.476471
09497500	5.04109	0.408328	0.485999	0.741178	0.411862	0.64323	0.408328	0.49214	0.46727	0.545882	0.480672
10296000	5.31725	0.388931	0.438871	0.705728	0.388931	0.641736	0.389335	0.490537	0.444579	0.512945	0.448684
10296500	5.29016	0.392176	0.444799	0.706915	0.392176	0.660629	0.399823	0.499155	0.453916	0.520647	0.45448
10301500	5.26507	0.431598	0.491843	0.743978	0.431598	0.697705	0.445867	0.536681	0.50881	0.581287	0.491407
10309000	5.13716	0.394993	0.461336	0.721842	0.394993	0.641029	0.402927	0.494808	0.457202	0.532413	0.456335
10312000	5.10171	0.329055	0.386994	0.652404	0.338359	0.55216	0.329055	0.40709	0.388889	0.444648	0.408449
11025500	4.37886	0.297378	0.407473	0.611958	0.341318	0.480472	0.297378	0.351586	0.345652	0.403927	0.391525
11080500	4.95041	0.295619	0.358297	0.600207	0.295619	0.518685	0.296999	0.353685	0.360239	0.380936	0.370818
11138500	4.98048	0.287368	0.346193	0.600348	0.304959	0.48284	0.287368	0.346826	0.344222	0.38623	0.369131
11160000	4.81199	0.352555	0.439596	0.70298	0.369664	0.557301	0.352555	0.413893	0.396145	0.479847	0.444421
11210500	5.34616	0.401965	0.451126	0.749237	0.401965	0.83632	0.46356	0.554095	0.545068	0.54613	0.51135
11213500	5.51837	0.400462	0.435414	0.736212	0.400462	0.677382	0.414119	0.51455	0.481143	0.531779	0.469272
11222000	5.38332	0.37567	0.418704	0.743883	0.37567	0.875631	0.467024	0.536627	0.552474	0.53352	0.501515
11224500	3.64983	0.249237	0.409725	0.545815	0.316781	0.390725	0.249237	0.287977	0.284576	0.33205	0.354987
11281000	5.22533	0.364303	0.418312	0.714208	0.364303	0.595762	0.368106	0.439011	0.4257	0.492529	0.436566
11342000	5.17189	0.402927	0.467443	0.769249	0.423585	0.631777	0.402927	0.478291	0.453798	0.545176	0.488115
11355500	4.38849	0.29677	0.405747	0.61122	0.303794	0.461888	0.29677	0.352414	0.351546	0.402139	0.373093
11401500	5.36154	0.379835	0.425066	0.708418	0.379835	0.65102	0.394763	0.488005	0.454955	0.512753	0.44817
11403000	5.4535	0.396496	0.436229	0.73534	0.396496	0.710753	0.42193	0.508408	0.488766	0.524375	0.479017
11413000	5.2851	0.385391	0.437521	0.756247	0.405261	0.626827	0.385391	0.465136	0.441333	0.521011	0.465403
11427000	4.64115	0.305379	0.394789	0.641563	0.329916	0.492007	0.305379	0.374856	0.351586	0.426264	0.392192
11497500	5.06107	0.437399	0.518546	0.765857	0.437399	0.709081	0.455076	0.544996	0.510892	0.593222	0.509259
11501000	5.00004	0.343045	0.411651	0.641945	0.347867	0.572127	0.343045	0.434461	0.400842	0.453138	0.413271
11530000	5.42829	0.388258	0.429149	0.73491	0.406394	0.638496	0.388258	0.474271	0.443867	0.516878	0.461936
11532500	5.4461	0.430331	0.474098	0.826391	0.492741	0.687036	0.430331	0.511343	0.474404	0.590089	0.520211
12027500	5.59475	0.460669	0.494038	0.806788	0.507609	0.733577	0.460669	0.566885	0.502942	0.610358	0.528479
12098500	4.92593	0.524212	0.638514	0.848527	0.524212	0.751913	0.529279	0.612625	0.583821	0.693504	0.565618
12134500	5.2614	0.530613	0.605101	0.874398	0.571086	0.77865	0.530613	0.62396	0.572286	0.701372	0.585488
12144500	4.98784	0.535205	0.643811	0.878952	0.564354	0.779413	0.535205	0.621659	0.572056	0.705298	0.593089
12149000	5.30086	0.561017	0.635012	0.899868	0.592556	0.822857	0.561017	0.650764	0.593489	0.734977	0.602157
12340000	5.23757	0.342185	0.391996	0.652098	0.361854	0.593422	0.342185	0.445	0.39726	0.454602	0.409395
12358500	5.32672	0.357587	0.402785	0.684903	0.374123	0.610292	0.357587	0.461403	0.412462	0.478672	0.427931
12413000	5.42734	0.415729	0.459594	0.743045	0.441533	0.681636	0.415729	0.523612	0.467603	0.549549	0.485806
12413500	5.46453	0.431067	0.473307	0.749261	0.447012	0.717639	0.431067	0.538923	0.480068	0.557646	0.494491
12449500	5.34409	0.363991	0.408665	0.674253	0.363991	0.661864	0.377492	0.482862	0.438042	0.473397	0.439712
12449950	5.26556	0.340445	0.38793	0.647324	0.344893	0.591185	0.340445	0.434347	0.394235	0.442067	0.400613
12459000	5.44835	0.403861	0.444751	0.722242	0.42233	0.670967	0.403861	0.51261	0.461336	0.524079	0.467537
12462500	5.45829	0.416336	0.457655	0.723888	0.424276	0.701437	0.416336	0.525667	0.47885	0.528679	0.479398
13186000	5.3214	0.437466	0.493252	0.741845	0.441133	0.701772	0.437466	0.547615	0.485273	0.568552	0.477472
13200000	5.41217	0.394882	0.437772	0.714649	0.394882	0.665087	0.402604	0.498219	0.464171	0.521876	0.452518
13298500	5.11912	0.440103	0.515834	0.752068	0.440103	0.762846	0.470791	0.575428	0.511208	0.576475	0.494592
13302500	4.98302	0.392726	0.472877	0.698238	0.397126	0.634095	0.392726	0.496541	0.443066	0.511277	0.443867
13336500	5.41057	0.435799	0.483275	0.752913	0.442933	0.701505	0.435799	0.550016	0.484206	0.567018	0.488607
13337000	5.47027	0.444467	0.487508	0.762114	0.451401	0.714707	0.444467	0.559084	0.496274	0.574419	0.493941
13340500	5.38917	0.483216	0.537985	0.797919	0.483216	0.839543	0.521987	0.62672	0.562605	0.634105	0.538771
13340600	5.43868	0.48026	0.529827	0.798578	0.48026	0.787247	0.492621	0.602024	0.538979	0.619434	0.531974
13351000	5.14049	0.361837	0.422338	0.68197	0.362473	0.595593	0.361837	0.451819	0.418173	0.481931	0.425242
14080500	5.0146	0.316666	0.378893	0.590108	0.316999	0.501408	0.316666	0.364645	0.365313	0.399357	0.383253
14101500	5.18529	0.421274	0.487464	0.750388	0.422148	0.672656	0.421274	0.51352	0.478195	0.552954	0.479857
14113000	4.94428	0.364188	0.44195	0.701839	0.37679	0.57962	0.364188	0.447	0.42013	0.491874	0.437666
14232500	5.21667	0.438175	0.503971	0.773822	0.465249	0.688507	0.438175	0.532363	0.491336	0.582035	0.513025
14233400	5.28799	0.463125	0.525484	0.786973	0.482887	0.731009	0.463125	0.563829	0.513635	0.610149	0.530393
14308000	5.52553	0.459386	0.498833	0.820293	0.506384	0.730508	0.459386	0.554741	0.508286	0.619261	0.530427
14321000	5.34352	0.450217	0.505529	0.79367	0.486485	0.703749	0.450217	0.544825	0.496333	0.607715	0.522344
14359000	4.85885	0.410962	0.50748	0.754415	0.42013	0.622861	0.410962	0.483904	0.458911	0.556846	0.480916
