# Supplementary material for: Data compression to define information content of hydrological time series
Source: Copernicus journal article supplement (doi:10.5194/hess-17-3171-2013), 2013-08-06
Supplement: Supplementary file 9 [file results_Q_8bits.xls]

## Sheet: Sheet1
gauge nr	H	Cbest	C/H	WAVPACK	ARJ	PPMD	LZMA	BZIP2	PNG	GIF	TIFF
01048000	7.40834	0.623886	0.673712	0.623886	0.650731	1.05049	0.72515	0.710942	0.674897	0.785244	0.652419
01055500	7.19973	0.564746	0.627519	0.564746	0.608992	0.963073	0.649386	0.667657	0.618678	0.723736	0.597876
01060000	7.05276	0.61246	0.694718	0.61246	0.646968	0.976599	0.67383	0.683387	0.652082	0.790164	0.645005
01064500	7.23406	0.636059	0.703405	0.636059	0.656064	1.01085	0.696574	0.702926	0.665266	0.795699	0.646462
01076500	7.32297	0.676073	0.738578	0.676073	0.694236	1.06855	0.751626	0.733563	0.712599	0.861603	0.686981
01127000	7.09878	0.608491	0.685742	0.608491	0.628344	0.992549	0.689053	0.705156	0.66725	0.795369	0.621243
01138000	7.26287	0.693144	0.763493	0.693144	0.708361	1.11355	0.797241	0.744565	0.743395	0.88796	0.710033
01197500	7.08539	0.646597	0.730062	0.646597	0.672901	1.05356	0.748912	0.726809	0.712357	0.851328	0.6699
01200000	7.23052	0.586543	0.648963	0.586543	0.611307	0.974005	0.661211	0.686778	0.634788	0.747005	0.598738
01321000	7.38688	0.627394	0.679469	0.627394	0.649947	1.03396	0.714707	0.713557	0.673401	0.79992	0.632795
01329000	7.34031	0.70423	0.76752	0.70423	0.716918	1.11654	0.80219	0.757931	0.749622	0.900453	0.720619
01329500	7.32703	0.638414	0.697051	0.638414	0.653964	1.09505	0.780771	0.736969	0.713973	0.820302	0.67028
01334500	7.19641	0.666784	0.74124	0.667035	0.67466	1.0433	0.732052	0.725982	0.698189	0.843275	0.666784
01348000	6.85829	0.776786	0.906099	0.791447	0.777134	1.11201	0.813467	0.776786	0.795561	1.00122	0.791968
01361000	7.03443	0.650482	0.739768	0.651537	0.650482	1.07468	0.763161	0.733606	0.707745	0.840216	0.668954
01371500	7.32905	0.633495	0.691489	0.633495	0.655748	1.05081	0.73056	0.723108	0.684653	0.817923	0.644697
01372500	7.05342	0.562484	0.63797	0.562484	0.585938	0.929189	0.621743	0.66445	0.603841	0.712507	0.566335
01421000	7.20323	0.643337	0.714499	0.643337	0.660656	1.01548	0.710473	0.713172	0.6848	0.816575	0.653117
01423000	7.39629	0.640446	0.692722	0.640446	0.654452	1.02817	0.708735	0.717422	0.674143	0.805139	0.64766
01426500	7.25546	0.6645	0.732689	0.6645	0.676051	1.05441	0.748812	0.73266	0.719208	0.850678	0.673401
01445000	6.94662	0.631706	0.727497	0.636347	0.631706	1.01652	0.709486	0.71654	0.660108	0.804529	0.651197
01445500	7.29391	0.630095	0.691091	0.630095	0.644047	1.00145	0.693954	0.706656	0.6656	0.80152	0.632195
01500500	7.52257	0.653437	0.694908	0.653437	0.667967	1.09735	0.780925	0.735075	0.716079	0.855948	0.666667
01503000	7.50971	0.606191	0.645768	0.606191	0.639646	1.05956	0.73031	0.716207	0.672851	0.803521	0.631795
01512500	7.48771	0.621193	0.663693	0.621193	0.651198	1.04886	0.725209	0.717658	0.677302	0.812072	0.640646
01514000	7.32134	0.668507	0.730475	0.668507	0.67287	1.02778	0.723088	0.708218	0.686938	0.842579	0.675007
01518000	7.21873	0.638996	0.708154	0.638996	0.641046	0.970246	0.678002	0.675551	0.6678	0.793719	0.640746
01520000	6.81999	0.583208	0.684116	0.583208	0.597112	0.897251	0.628946	0.656216	0.627872	0.752684	0.600064
01520500	7.31088	0.64421	0.704933	0.64421	0.655399	1.02842	0.725787	0.716789	0.690741	0.822401	0.659425
01531000	7.33701	0.614792	0.670347	0.614792	0.640996	1.0083	0.690054	0.699255	0.653098	0.791369	0.634245
01534000	7.26086	0.645697	0.711428	0.645697	0.66385	1.0264	0.707606	0.717508	0.674451	0.814122	0.648847
01541000	7.31333	0.681552	0.745545	0.685403	0.698505	1.06016	0.739611	0.737361	0.700305	0.853728	0.681552
01541500	7.11264	0.620493	0.697905	0.620493	0.646297	0.996449	0.679152	0.702755	0.654248	0.790369	0.630145
01543500	7.34016	0.624694	0.68085	0.624694	0.653148	1.03921	0.714207	0.720558	0.6672	0.791319	0.632345
01548500	7.31925	0.606191	0.662572	0.606191	0.627994	1.00035	0.680152	0.702155	0.643246	0.764115	0.609041
01556000	7.27407	0.680402	0.748304	0.680402	0.688403	1.04136	0.73156	0.727959	0.704606	0.863279	0.680652
01558000	6.99677	0.624244	0.713751	0.627494	0.633645	0.952593	0.656699	0.687803	0.645797	0.781217	0.624244
01559000	6.89008	0.639496	0.742512	0.639496	0.645697	0.981497	0.692604	0.701505	0.676952	0.823424	0.642396
01560000	7.26894	0.6679	0.735073	0.6679	0.679852	1.0204	0.705556	0.711707	0.676451	0.841076	0.66875
01562000	7.32525	0.621093	0.678304	0.621093	0.647747	1.0166	0.697055	0.705556	0.658549	0.79752	0.640046
01567000	7.21503	0.60059	0.665932	0.60059	0.625944	1.001	0.698905	0.700355	0.659099	0.794169	0.620843
01574000	7.08659	0.649597	0.733325	0.649597	0.6675	1.01815	0.705856	0.716107	0.680352	0.823424	0.657849
01595000	7.16483	0.713313	0.796461	0.713313	0.718641	1.05748	0.761144	0.743977	0.727639	0.902563	0.713432
01606500	7.18614	0.609747	0.678804	0.609747	0.634816	0.982613	0.66959	0.692583	0.640473	0.769139	0.624384
01608500	7.1904	0.584004	0.64976	0.584004	0.619349	0.972077	0.652203	0.683656	0.620491	0.734987	0.606789
01610000	7.36216	0.614892	0.668165	0.614892	0.647697	1.0204	0.702555	0.707756	0.662999	0.790069	0.637646
01611500	7.27028	0.596371	0.656228	0.596371	0.633247	0.987778	0.668642	0.688641	0.63457	0.757685	0.62748
01628500	7.02338	0.570086	0.649358	0.570086	0.591839	0.904336	0.608041	0.648797	0.59879	0.707506	0.583137
01631000	6.97619	0.579487	0.664531	0.579487	0.596439	0.93549	0.640146	0.671851	0.620293	0.743161	0.593439
01634000	6.99305	0.581487	0.665218	0.581487	0.604841	0.93359	0.630695	0.660199	0.615242	0.73421	0.59799
01643000	7.07479	0.647297	0.731948	0.647297	0.66455	1.0058	0.695604	0.711657	0.675401	0.816322	0.656548
01649500	6.64117	0.709567	0.85475	0.743198	0.737928	0.988254	0.709567	0.724526	0.712629	0.91532	0.727638
01663500	6.82863	0.593507	0.695317	0.593507	0.610259	0.938436	0.648224	0.682521	0.636364	0.74598	0.598521
01664000	6.97078	0.603491	0.692594	0.603491	0.622893	0.960694	0.66345	0.690354	0.644997	0.760214	0.609941
01667500	6.75217	0.593725	0.703448	0.593725	0.610839	0.914884	0.632284	0.671098	0.623778	0.745059	0.596373
01668000	6.93263	0.60169	0.694329	0.60169	0.629794	0.953893	0.654898	0.682802	0.639746	0.757564	0.615192
01672500	7.03489	0.619304	0.704266	0.619304	0.645774	1.00292	0.697667	0.708453	0.665639	0.804314	0.642582
01674500	6.84035	0.492926	0.576493	0.492926	0.54112	0.897134	0.598228	0.650308	0.574545	0.666684	0.540965
02016000	7.18216	0.624294	0.695383	0.624294	0.660449	0.981797	0.6679	0.691754	0.644797	0.789868	0.651398
02018000	7.27807	0.59899	0.658405	0.59899	0.635495	0.975946	0.656398	0.682702	0.628694	0.754263	0.625794
02030500	6.69453	0.620223	0.74117	0.620223	0.631739	0.930278	0.646119	0.675337	0.641822	0.776855	0.628072
02055000	7.06132	0.620393	0.702864	0.620393	0.640696	0.976146	0.676702	0.698255	0.657949	0.784818	0.628994
02058400	6.5193	0.617526	0.757783	0.617526	0.625461	0.918633	0.647943	0.668964	0.648291	0.775249	0.628733
02083500	7.28099	0.569471	0.625707	0.569471	0.615535	1.03531	0.710863	0.703611	0.651896	0.76778	0.614484
02102000	7.28479	0.705406	0.774662	0.705406	0.727759	1.10022	0.789818	0.752663	0.745262	0.910037	0.719858
02116500	6.81665	0.639596	0.750628	0.639596	0.653498	0.967795	0.692004	0.697405	0.681652	0.823374	0.651798
02118000	6.48145	0.583888	0.720687	0.583888	0.59739	0.872631	0.611242	0.644397	0.615992	0.73666	0.593539
02121000	0	0		0	0	0	0	0	0	0	0
02126000	7.28335	0.722908	0.794039	0.722908	0.746462	1.08376	0.765965	0.754313	0.73061	0.902935	0.73086
02135000	7.4366	0.413407	0.444727	0.413407	0.502037	0.869804	0.550377	0.57987	0.512887	0.535656	0.495721
02138500	6.78034	0.633595	0.747568	0.633595	0.645297	0.939841	0.655698	0.688053	0.649997	0.79962	0.636395
02143000	6.63634	0.662499	0.798632	0.662499	0.6676	0.944592	0.677652	0.690154	0.688003	0.839026	0.66615
02143040	6.33094	0.598664	0.756493	0.630651	0.63419	0.842871	0.598664	0.633723	0.618831	0.779299	0.635927
02143500	6.37495	0.60998	0.765471	0.613463	0.614267	0.859363	0.60998	0.644013	0.624933	0.766213	0.616197
02156500	6.44825	0.66331	0.822933	0.66331	0.672393	0.978201	0.713915	0.69632	0.701874	0.868739	0.674936
02165000	6.66945	0.715821	0.858627	0.737062	0.725805	0.998879	0.741137	0.715821	0.750509	0.919927	0.732478
02174000	0	0		0	0	0	0	0	0	0	0
02192000	6.71445	0.576987	0.687457	0.576987	0.60109	0.892784	0.616943	0.641796	0.613442	0.725459	0.594939
02202000	0	0		0	0	0	0	0	0	0	0
02202500	7.48052	0.414462	0.443244	0.414462	0.495224	0.918288	0.567935	0.612842	0.523228	0.553733	0.492124
02217500	6.83538	0.606391	0.709708	0.606391	0.621693	0.940541	0.662799	0.676651	0.648997	0.773416	0.614992
02218500	6.94855	0.609741	0.702007	0.609741	0.632446	1.0041	0.723444	0.709554	0.683287	0.803668	0.63672
02219500	6.85866	0.601371	0.701445	0.601371	0.634405	0.985576	0.700027	0.701006	0.677322	0.782655	0.63396
02228000	7.51325	0.416662	0.443656	0.416662	0.507376	0.93244	0.562184	0.612542	0.504176	0.545932	0.502775
02236000	4.00177	0.366864	0.733403	0.476695	0.453441	0.512769	0.366864	0.395775	0.390481	0.498547	0.494602
02273000	6.96373	0.585435	0.672554	0.593896	0.585435	0.864113	0.598204	0.594467	0.625662	0.72153	0.603187
02296750	7.18377	0.490474	0.546202	0.490474	0.537581	0.926289	0.612142	0.653048	0.575736	0.656448	0.527079
02329000	7.37397	0.46877	0.508568	0.46877	0.53443	0.944142	0.59769	0.639346	0.549432	0.614642	0.524979
02339500	7.17203	0.751413	0.838159	0.780017	0.752863	1.04206	0.789318	0.751413	0.790019	0.948242	0.758214
02347500	6.99371	0.563284	0.644332	0.563284	0.59954	0.945992	0.648597	0.674851	0.623994	0.73196	0.586938
02349500	7.05033	0.515377	0.584798	0.515377	0.579837	0.93304	0.629594	0.650648	0.593989	0.697355	0.574286
02365500	7.16961	0.508312	0.567185	0.508312	0.5873	0.983428	0.658441	0.677181	0.605576	0.694889	0.588178
02375500	7.37819	0.572186	0.620407	0.572186	0.621643	1.04826	0.724659	0.711257	0.660499	0.779467	0.614992
02383500	7.16981	0.680353	0.759131	0.680353	0.686618	1.05445	0.756762	0.733737	0.734298	0.871377	0.687993
02387000	7.22117	0.649497	0.719548	0.649497	0.680402	1.04921	0.73606	0.727959	0.693654	0.840376	0.673901
02387500	7.3869	0.6665	0.721818	0.6665	0.691354	1.08241	0.772566	0.73531	0.724609	0.873231	0.689053
02414500	7.1765	0.697433	0.777463	0.697433	0.738947	1.06607	0.780257	0.747861	0.77012	0.906785	0.736094
02437000	6.84325	1	1.16904	1.4661	1.25	4.5339	1.61441	1.56356	1.90678	1.75847	1.78814
02448000	5.67115	0.496693	0.700659	0.556725	0.536731	0.72259	0.496693	0.537182	0.499248	0.605532	0.544748
02456500	7.49918	0.637734	0.680325	0.637734	0.671047	1.06148	0.728352	0.723971	0.677007	0.808425	0.654034
02472000	7.32473	0.642796	0.702056	0.642796	0.676702	1.0323	0.711607	0.702555	0.671451	0.812772	0.66395
02475000	7.41068	0.593289	0.640469	0.593289	0.642596	1.03426	0.708106	0.692554	0.655498	0.776817	0.635345
02475500	7.22107	0.633095	0.701387	0.633095	0.6671	1.03536	0.715607	0.712257	0.676051	0.812372	0.655848
02478500	7.54042	0.564885	0.599313	0.564885	0.621893	1.05066	0.709956	0.698705	0.644047	0.749962	0.616893
02479300	7.24239	0.653868	0.722267	0.653868	0.699387	1.05753	0.743234	0.725088	0.695423	0.837741	0.699201
02482000	7.36952	0.531779	0.577274	0.531779	0.567561	0.967321	0.63307	0.673706	0.58868	0.674357	0.554849
02486000	7.45544	0.604041	0.648161	0.604041	0.621987	1.03164	0.722951	0.6988	0.679212	0.784176	0.627423
02492000	6.82099	0.569056	0.667417	0.569056	0.616183	0.912285	0.63139	0.644989	0.611097	0.749208	0.612239
03010500	7.24885	0.60189	0.66426	0.60189	0.629544	1.0089	0.689803	0.703155	0.649847	0.770716	0.608891
03011020	7.4243	0.619493	0.66753	0.619493	0.652948	1.04656	0.719608	0.717808	0.670151	0.79667	0.635495
03020500	7.41321	0.715707	0.772359	0.715707	0.73281	1.09851	0.777517	0.753763	0.736761	0.904036	0.717908
03024000	7.61579	0.629394	0.661147	0.629394	0.675501	1.10367	0.772566	0.73576	0.700955	0.828324	0.662449
03032500	7.40029	0.660799	0.714349	0.660799	0.685153	1.06736	0.747062	0.73351	0.698455	0.837276	0.6682
03050500	7.00261	0.66068	0.754782	0.66068	0.68217	1.03462	0.729094	0.727745	0.693641	0.851285	0.671425
03051000	7.207	0.672757	0.746782	0.672757	0.700005	1.07583	0.762028	0.743188	0.711943	0.86521	0.686874
03054500	7.30021	0.658639	0.721775	0.658639	0.69414	1.08175	0.761976	0.739918	0.702652	0.847823	0.678102
03065000	7.1052	0.673021	0.757779	0.673021	0.691766	1.04792	0.733333	0.734392	0.695949	0.842573	0.674504
03069000	7.01462	0.682514	0.77839	0.682514	0.700988	1.04336	0.745646	0.738291	0.707814	0.860202	0.691633
03069500	7.2307	0.696943	0.771093	0.696943	0.714694	1.0874	0.768516	0.750766	0.720091	0.869258	0.697773
03070000	7.17707	0.677187	0.754834	0.677187	0.698697	1.06807	0.758003	0.741997	0.70729	0.850724	0.685612
03075500	7.2762	0.688753	0.757267	0.694304	0.710007	1.06616	0.750213	0.743912	0.714157	0.86828	0.688753
03079000	7.35498	0.682952	0.742846	0.683202	0.699505	1.07406	0.756413	0.740311	0.714157	0.856929	0.682952
03109500	7.36458	0.655698	0.712273	0.655698	0.681502	1.05656	0.73366	0.724609	0.693454	0.832425	0.6677
03111500	7.07909	0.672301	0.75976	0.679502	0.683252	0.995699	0.694854	0.708156	0.682502	0.849877	0.672301
03114500	7.28515	0.665138	0.730404	0.665138	0.7	1.05344	0.733372	0.733028	0.686927	0.848394	0.683028
03136000	7.53259	0.674078	0.715906	0.674078	0.682476	1.10294	0.79045	0.736383	0.725746	0.861473	0.685435
03155500	7.24569	0.668931	0.73857	0.668931	0.702782	1.05359	0.734407	0.731245	0.68896	0.848843	0.687496
03159500	7.43258	0.644797	0.694022	0.644797	0.677402	1.06226	0.73416	0.723859	0.688503	0.827774	0.6661
03161000	6.80124	0.637327	0.74966	0.637327	0.64998	0.968494	0.683187	0.70109	0.670084	0.809762	0.644229
03164000	6.95812	0.633495	0.728352	0.633495	0.659749	1.00035	0.700805	0.709306	0.676201	0.820573	0.654948
03165500	6.9047	0.701872	0.813212	0.701872	0.70809	1.09626	0.802004	0.744368	0.751975	0.921299	0.722718
03167000	7.02153	0.631795	0.719837	0.631795	0.654898	0.975346	0.678852	0.692804	0.657899	0.805721	0.648747
03168000	7.00327	0.691804	0.790264	0.691804	0.697655	1.06526	0.771216	0.73401	0.73276	0.902835	0.698905
03173000	7.26947	0.626394	0.689342	0.626394	0.658299	1.0068	0.684803	0.701705	0.652048	0.789618	0.649047
03175500	7.29382	0.631246	0.692363	0.631246	0.661199	1.01808	0.699251	0.710611	0.662524	0.798584	0.648515
03179000	7.35763	0.656591	0.713915	0.656591	0.692165	1.0688	0.749945	0.735214	0.698767	0.843736	0.685727
03180500	7.05423	0.636591	0.72194	0.636591	0.662743	1.00383	0.697736	0.709614	0.664128	0.806445	0.647776
03182500	7.34432	0.656284	0.714875	0.656284	0.684732	1.06079	0.733738	0.730987	0.686809	0.827441	0.669781
03183500	7.49253	0.648051	0.691944	0.648051	0.68786	1.08014	0.746146	0.73478	0.686978	0.827581	0.675455
03184000	7.5126	0.64037	0.681915	0.64037	0.679348	1.0791	0.74215	0.730576	0.681113	0.814657	0.667255
03186500	7.12743	0.680386	0.763682	0.681891	0.702289	1.03862	0.730316	0.735558	0.698344	0.853221	0.680386
03198500	7.15816	0.616702	0.68923	0.616702	0.654902	1.01837	0.69933	0.712098	0.658847	0.793325	0.639747
03199000	7.0921	0.624898	0.704894	0.624898	0.650078	1.01937	0.715712	0.718021	0.674439	0.801907	0.641958
03213000	7.35372	0.651301	0.708541	0.651301	0.678216	1.07896	0.765204	0.736059	0.713532	0.84171	0.672788
03214000	7.31411	0.629823	0.688886	0.629823	0.66935	1.06629	0.752176	0.728677	0.694952	0.814114	0.663548
03237500	7.16612	0.6658	0.743275	0.6658	0.686753	1.0162	0.700005	0.712857	0.671301	0.830675	0.670751
03238500	7.09669	0.701405	0.790684	0.718308	0.729759	1.02055	0.726509	0.720308	0.701405	0.886383	0.715407
03251500	5.40619	0.480484	0.711012	0.542228	0.520258	0.69265	0.487103	0.507076	0.480484	0.562543	0.530187
03252500	7.42553	0.634143	0.683203	0.634143	0.672621	1.01493	0.704012	0.703309	0.667116	0.807145	0.658975
03253500	7.37248	0.616341	0.668802	0.616341	0.646037	1.03902	0.712969	0.712256	0.673289	0.791004	0.633252
03265000	7.35961	0.660999	0.718515	0.660999	0.685803	1.04256	0.721558	0.721858	0.681452	0.845877	0.679052
03266000	7.5181	0.646897	0.688362	0.646897	0.679452	1.05641	0.728409	0.722708	0.675651	0.840176	0.671501
03269500	6.93426	0.635345	0.732993	0.641396	0.640996	0.948892	0.666	0.687253	0.660099	0.808771	0.635345
03274000	7.48227	0.667	0.713153	0.667	0.687203	1.07601	0.755763	0.73491	0.701105	0.858229	0.675001
03281500	7.05306	0.59128	0.670665	0.59128	0.633099	0.974226	0.659892	0.688366	0.627852	0.755654	0.613488
03289500	7.31511	0.627428	0.686172	0.627428	0.661509	1.0158	0.700676	0.712632	0.660373	0.795131	0.644685
03301500	7.32559	0.621333	0.678534	0.621333	0.663865	1.04778	0.71684	0.714089	0.669366	0.808883	0.65057
03303000	7.43056	0.636195	0.68495	0.636195	0.670801	1.02865	0.700305	0.711757	0.657999	0.793169	0.651348
03308500	7.48778	0.640889	0.68473	0.640889	0.664556	1.06488	0.740178	0.719676	0.70286	0.813256	0.657653
03324300	7.40283	0.704625	0.761465	0.704625	0.736336	1.08108	0.76955	0.738078	0.725105	0.906607	0.732372
03326500	7.15016	0.654198	0.731953	0.654198	0.675151	1.01425	0.699255	0.706906	0.675001	0.825674	0.6678
03328500	7.36205	0.626994	0.681325	0.626994	0.671151	1.01615	0.699655	0.698705	0.662249	0.80137	0.660549
03331500	7.46615	0.522578	0.559944	0.522578	0.573136	0.954543	0.635095	0.653698	0.59804	0.677052	0.557384
03339500	7.26806	0.622993	0.685732	0.622993	0.654848	0.995499	0.679252	0.695704	0.651748	0.791619	0.642296
03345500	7.31629	0.553586	0.605319	0.553586	0.592502	0.95487	0.632793	0.659892	0.612062	0.71139	0.577832
03346000	7.18935	0.633048	0.704429	0.633048	0.663203	0.985585	0.670487	0.68368	0.645579	0.795945	0.650163
03348000	7.22292	0.659366	0.730304	0.659366	0.676062	1.01897	0.729384	0.714542	0.700598	0.84626	0.674147
03349000	7.29113	0.630395	0.691683	0.630395	0.670551	1.03456	0.719808	0.714757	0.678152	0.819623	0.6636
03361500	7.32246	0.624194	0.68195	0.624194	0.655848	0.9996	0.684353	0.694454	0.653198	0.789968	0.645497
03361650	6.93512	0.586671	0.676753	0.586671	0.625391	0.947669	0.65582	0.67561	0.627034	0.76408	0.624609
03362500	7.32259	0.617793	0.674944	0.617793	0.655298	1.0056	0.682352	0.698855	0.645947	0.783818	0.639946
03363000	7.34567	0.592903	0.645717	0.592903	0.635772	0.990175	0.675762	0.682208	0.639339	0.755429	0.624257
03364000	7.42757	0.586356	0.631545	0.586356	0.635437	1.00121	0.676178	0.686376	0.635135	0.759922	0.625841
03365500	7.50752	0.592789	0.631674	0.592789	0.635045	0.994299	0.66865	0.675301	0.630795	0.748412	0.622593
03381500	7.31098	0.553178	0.605312	0.553178	0.604982	0.995008	0.655257	0.678892	0.619244	0.730134	0.600397
03410500	7.40446	0.655766	0.70851	0.655766	0.687449	1.06163	0.729218	0.729167	0.680267	0.819173	0.671251
03438000	7.27703	0.602893	0.66279	0.602893	0.632386	0.964853	0.644611	0.67609	0.627241	0.744957	0.613845
03443000	6.98179	0.639946	0.733274	0.641396	0.652198	0.988948	0.695204	0.709906	0.66945	0.808221	0.639946
03448000	6.92256	0.62801	0.725754	0.62801	0.642822	0.992629	0.703826	0.708319	0.677782	0.802387	0.644928
03451500	7.03081	0.626694	0.713083	0.626694	0.646247	0.992349	0.695404	0.703406	0.66675	0.79912	0.634745
03455000	7.17242	0.65699	0.732795	0.65699	0.673499	1.04288	0.738666	0.728393	0.69701	0.840634	0.666547
03465500	6.96375	0.65726	0.755064	0.65726	0.670497	1.01942	0.723577	0.724451	0.694282	0.830679	0.664718
03470000	7.17426	0.728642	0.812507	0.728642	0.736737	1.09777	0.791713	0.762863	0.749078	0.906636	0.734893
03473000	7.1759	0.656699	0.732115	0.656699	0.675051	1.02025	0.711557	0.717808	0.677552	0.826724	0.661649
03490000	7.31619	0.647073	0.707552	0.647073	0.679926	1.08286	0.765601	0.736694	0.70223	0.830985	0.689991
03504000	7.18627	0.661199	0.73607	0.687303	0.680152	1.0056	0.705056	0.721958	0.688603	0.832575	0.661199
03512000	7.22573	0.697149	0.771851	0.704921	0.706838	1.05526	0.74484	0.745445	0.721221	0.876306	0.697149
03521500	7.1649	0.680832	0.760185	0.680832	0.698669	1.05227	0.743918	0.734015	0.70621	0.867795	0.691783
03524000	7.31996	0.647097	0.707214	0.647097	0.680252	1.05041	0.728559	0.728009	0.683052	0.822423	0.66715
03528000	7.37659	0.622052	0.674622	0.622052	0.667339	1.06087	0.733723	0.722368	0.675603	0.798764	0.660552
03531500	7.28068	0.657399	0.722349	0.657399	0.685903	1.03581	0.717258	0.721358	0.680952	0.825024	0.670151
03532000	7.35658	0.618641	0.672749	0.618641	0.661246	1.05013	0.727303	0.715207	0.671124	0.795914	0.655601
03540500	7.12772	0.577437	0.648104	0.577437	0.611637	0.958745	0.646913	0.67903	0.610831	0.723913	0.590204
03550000	7.1248	0.645347	0.724621	0.660799	0.66615	0.99765	0.691404	0.708106	0.6667	0.807421	0.645347
03567500	7.18508	0.686917	0.764825	0.686917	0.705748	1.04798	0.743082	0.729982	0.713853	0.863763	0.706648
03574500	7.27347	0.619193	0.681042	0.619193	0.659026	0.991544	0.668602	0.687958	0.639059	0.773686	0.637429
03603000	7.43379	0.609225	0.655628	0.609225	0.656368	1.05251	0.734987	0.713882	0.675007	0.788874	0.656876
04073500	7.32659	0.461969	0.50443	0.461969	0.486873	0.852378	0.544332	0.580087	0.53423	0.591939	0.496374
04079000	7.2368	0.450568	0.498085	0.450568	0.508126	0.875781	0.565235	0.590639	0.53148	0.593489	0.513077
04100500	6.85295	0.519678	0.606661	0.519678	0.541231	0.860979	0.578637	0.628244	0.582937	0.673401	0.537081
04113000	7.32147	0.650265	0.71053	0.650265	0.662795	1.08445	0.768388	0.727893	0.706296	0.860585	0.662897
04115000	7.34	0.466429	0.50837	0.466429	0.526286	0.886296	0.559857	0.60973	0.531533	0.607794	0.513602
04144000	7.34302	0.574489	0.625888	0.574489	0.604101	1.03351	0.730201	0.690106	0.665238	0.779249	0.609687
04164000	7.21353	0.717451	0.795673	0.718113	0.721883	1.07941	0.780002	0.753311	0.757233	0.920793	0.717451
04165500	7.13644	0.703749	0.788908	0.703749	0.709352	1.03948	0.748268	0.727842	0.730134	0.90052	0.704717
04176500	7.36318	0.568358	0.617513	0.568358	0.608038	1.00733	0.690964	0.689079	0.643134	0.756469	0.60488
04178000	7.55269	0.567485	0.601095	0.567485	0.626194	1.03441	0.701005	0.694454	0.642846	0.750363	0.617693
04183500	7.6558	0.670819	0.700979	0.670819	0.692062	1.1578	0.845073	0.748043	0.744929	0.883645	0.699649
04185000	7.33801	0.565385	0.61639	0.565385	0.622843	1.00695	0.677402	0.683353	0.634345	0.753313	0.616693
04191500	7.28139	0.706306	0.776012	0.706306	0.720808	1.07491	0.772616	0.739811	0.748212	0.900885	0.719958
04198000	7.42748	0.627494	0.675863	0.627494	0.671701	1.04736	0.720808	0.710757	0.6695	0.813372	0.659499
04201500	7.25434	0.73061	0.805707	0.73061	0.747062	1.07631	0.775266	0.746012	0.742161	0.921288	0.73551
04212000	7.2016	0.601024	0.667656	0.601024	0.642886	1.06049	0.747083	0.719857	0.678813	0.795189	0.643398
04221000	7.34959	0.681158	0.741438	0.681158	0.684892	1.08015	0.761968	0.743383	0.716751	0.856799	0.690202
04221500	7.26018	0.649115	0.71526	0.649115	0.658628	1.07456	0.756969	0.734403	0.70719	0.83208	0.66604
04223000	7.27452	0.678202	0.745838	0.678202	0.688903	1.06556	0.745762	0.73566	0.712407	0.86713	0.683603
05053000	5.76016	0.390209	0.541942	0.445067	0.442316	0.608691	0.392109	0.420813	0.390209	0.478322	0.454218
05244000	7.01929	0.454096	0.51754	0.454096	0.460632	0.816627	0.522693	0.560931	0.525319	0.566795	0.471749
05280000	7.56169	0.389558	0.412139	0.389558	0.436465	0.825474	0.482072	0.540631	0.481122	0.494974	0.445217
05320500	7.37879	0.458623	0.497234	0.458623	0.490345	0.853443	0.526237	0.572635	0.520418	0.570266	0.488645
05383000	6.18906	0.604525	0.781411	0.639307	0.604525	0.922133	0.66097	0.654712	0.688531	0.797087	0.630882
05408000	6.31796	0.613292	0.77657	0.631495	0.615142	0.846077	0.613292	0.622443	0.634395	0.779117	0.623293
05410490	6.52288	0.522778	0.641162	0.522778	0.527979	0.812222	0.557784	0.581737	0.568185	0.6691	0.544332
05410500	0	0		0	0	0	0	0	0	0	0
05412500	7.24169	0.565085	0.624258	0.565085	0.583538	0.93544	0.628644	0.650648	0.614692	0.713707	0.578537
05418500	7.0153	0.609291	0.694815	0.609291	0.615142	0.964595	0.677452	0.686453	0.662199	0.79812	0.615992
05422000	7.41604	0.522878	0.564052	0.522878	0.548232	0.944792	0.621293	0.649547	0.595989	0.673551	0.549682
05430500	7.21708	0.538381	0.596785	0.538381	0.542231	0.922188	0.611592	0.644247	0.604341	0.707956	0.554583
05435500	7.19158	0.515689	0.573658	0.515689	0.563213	0.933374	0.63422	0.643847	0.614609	0.693358	0.564945
05440000	7.39899	0.569275	0.615516	0.569275	0.613845	0.986451	0.672474	0.682508	0.635086	0.74078	0.602588
05447500	7.40909	0.563468	0.608407	0.563468	0.59943	0.966229	0.649246	0.670181	0.621995	0.721628	0.587561
05451500	7.2522	0.518378	0.57183	0.518378	0.537981	0.915787	0.60124	0.640746	0.588538	0.66705	0.53648
05452000	7.01286	0.584145	0.66637	0.584145	0.590073	0.899478	0.607656	0.643625	0.615593	0.733698	0.589571
05454500	7.49349	0.582937	0.62234	0.586388	0.582937	0.984748	0.677252	0.642296	0.677202	0.750613	0.591889
05455500	7.28358	0.60039	0.659445	0.60039	0.624244	0.976146	0.663149	0.676752	0.642646	0.761114	0.616693
05457700	6.72602	0.505008	0.600662	0.505008	0.520657	0.85313	0.574178	0.607825	0.573474	0.651017	0.542879
05458500	7.17767	0.588288	0.655687	0.588288	0.608241	0.980897	0.690454	0.680102	0.660449	0.783418	0.608891
05462000	7.28656	0.542284	0.59538	0.542284	0.562885	0.938975	0.639014	0.655561	0.611972	0.703926	0.566439
05471500	7.33733	0.517178	0.563886	0.517178	0.542181	0.910187	0.589788	0.626194	0.577487	0.652448	0.539581
05472500	7.07642	0.548482	0.620068	0.548482	0.565885	0.907836	0.604591	0.638996	0.59854	0.696104	0.562884
05476500	7.28111	0.47033	0.516767	0.47033	0.475453	0.853998	0.540404	0.59395	0.53644	0.599805	0.48643
05479000	7.49226	0.496675	0.530333	0.496675	0.526429	0.924589	0.594639	0.626144	0.564685	0.639496	0.524429
05481000	7.04741	0.495174	0.562106	0.495174	0.519328	0.853778	0.553333	0.603741	0.551483	0.627494	0.513927
05482500	7.24349	0.489973	0.541146	0.489973	0.517328	0.877632	0.560884	0.604741	0.552083	0.622343	0.517978
05484500	7.4947	0.561284	0.599126	0.561284	0.582087	0.996449	0.671001	0.675801	0.632395	0.722358	0.579487
05502040	6.80996	0.651311	0.765127	0.678301	0.663888	0.923974	0.651311	0.669187	0.664806	0.820603	0.663393
05507500	7.25464	0.614261	0.677372	0.614261	0.657419	1.00641	0.698629	0.692788	0.657338	0.781861	0.652957
05508000	7.32731	0.675401	0.737407	0.675401	0.696254	1.04641	0.736861	0.718558	0.721608	0.855628	0.692004
05514500	7.23449	0.623916	0.689935	0.623916	0.653593	0.970556	0.660111	0.676637	0.638173	0.776608	0.647018
05515500	7.46001	0.557684	0.598051	0.557684	0.593489	0.948392	0.655148	0.652898	0.625994	0.702755	0.580437
05517000	7.30247	0.559984	0.613474	0.559984	0.617793	0.979297	0.670051	0.66855	0.630295	0.743111	0.613592
05517500	7.57569	0.503372	0.531565	0.503372	0.570299	0.973686	0.65558	0.660194	0.600416	0.670943	0.567155
05518000	7.46733	0.476672	0.510674	0.476672	0.529329	0.913137	0.59724	0.624194	0.567235	0.624044	0.523829
05520500	7.3738	0.477486	0.518035	0.477486	0.516249	0.892573	0.57172	0.620365	0.552313	0.612062	0.509016
05526000	7.54502	0.526081	0.557804	0.526081	0.599678	1.01438	0.67748	0.683396	0.619142	0.710593	0.587222
05542000	7.27161	0.574355	0.631887	0.574355	0.604646	0.943621	0.63704	0.665984	0.615264	0.728346	0.590632
05546500	7.31186	0.853035	0.933316	0.900958	0.853035	2.41693	1.22843	1.08946	1.28914	1.14537	1.16773
05552500	7.00184	0.568562	0.649614	0.568562	0.585931	0.947433	0.652353	0.678892	0.637734	0.749134	0.581092
05554500	7.21344	0.54513	0.604572	0.54513	0.581601	0.926752	0.619499	0.650672	0.597392	0.705175	0.571516
05555300	7.44658	0.580215	0.623336	0.580215	0.621464	1.03249	0.719383	0.703778	0.652126	0.751871	0.623198
05555500	7.40129	0.610099	0.659451	0.610099	0.627392	1.04415	0.738644	0.707978	0.68054	0.788679	0.634771
05569500	7.25059	0.569275	0.628114	0.569275	0.602435	0.965668	0.649093	0.671455	0.627903	0.731968	0.591891
05570000	7.34219	0.579971	0.631933	0.579971	0.611349	0.992258	0.675377	0.684087	0.64675	0.753718	0.602893
05582000	7.50597	0.553586	0.590022	0.553586	0.591942	0.96358	0.651131	0.660809	0.616188	0.707264	0.575744
05584500	7.09377	0.57773	0.651535	0.57773	0.610024	0.952119	0.640841	0.663712	0.622759	0.736654	0.597035
05585000	7.331	0.598818	0.653464	0.598818	0.63208	1.00703	0.679758	0.685768	0.65434	0.771903	0.624898
05592500	7.34785	0.553993	0.603163	0.553993	0.582722	0.968725	0.648533	0.662795	0.633303	0.713784	0.576406
05593000	7.40459	0.526895	0.569263	0.526895	0.537999	0.897973	0.606968	0.600041	0.609464	0.661675	0.555369
05594000	7.10718	0.587714	0.661544	0.587714	0.62826	0.979167	0.668857	0.681031	0.639059	0.772107	0.623574
06191500	7.47463	0.479872	0.513601	0.479872	0.500125	0.913487	0.589588	0.615592	0.554583	0.640496	0.500675
06192500	7.28501	0.46497	0.510605	0.46497	0.489523	0.870081	0.566085	0.59769	0.543382	0.622093	0.494124
06225500	7.39156	0.521278	0.564187	0.521278	0.540981	0.952443	0.644547	0.646747	0.604091	0.702855	0.545532
06334500	6.85872	0.570466	0.665391	0.575784	0.570821	0.856172	0.580275	0.598416	0.570466	0.719317	0.584057
06340500	6.55461	0.461822	0.56366	0.471966	0.463235	0.721877	0.461822	0.506081	0.48221	0.5676	0.480999
06359500	6.56965	0.537731	0.654806	0.582887	0.562934	0.791869	0.537731	0.563184	0.538331	0.681102	0.570486
06426500	5.44124	0.451254	0.663457	0.576758	0.531131	0.643914	0.451254	0.467156	0.457798	0.60318	0.543119
06441500	4.99024	0.406761	0.65209	0.560384	0.492274	0.594939	0.416913	0.418113	0.406761	0.53153	0.509626
06446000	0	0		0	0	0	0	0	0	0	0
06454500	6.09682	0.505827	0.663726	0.546999	0.514378	0.728316	0.505827	0.558887	0.536633	0.683982	0.533119
06480000	7.0902	0.422653	0.476887	0.422653	0.441307	0.753146	0.455006	0.515202	0.474106	0.529903	0.461633
06600500	7.0635	0.501875	0.568415	0.507076	0.501875	0.818073	0.53528	0.572336	0.554083	0.627194	0.519428
06606600	7.35702	0.482072	0.524204	0.482072	0.489923	0.860629	0.547232	0.593639	0.544882	0.596339	0.500375
06607200	7.11718	0.548432	0.61646	0.548582	0.548432	0.874031	0.588638	0.615242	0.59854	0.683152	0.556984
06609500	7.05497	0.572586	0.649286	0.579987	0.572586	0.892784	0.609991	0.636045	0.625444	0.719258	0.577987
06799500	6.75081	0.545532	0.646478	0.552783	0.545532	0.837076	0.579137	0.606641	0.594639	0.692804	0.560634
06808500	7.13772	0.581204	0.651417	0.586546	0.581204	0.915697	0.623482	0.639002	0.635223	0.725422	0.591131
06810000	7.21214	0.571286	0.633693	0.571286	0.580837	0.942791	0.635945	0.648147	0.632095	0.720058	0.580487
06811500	6.55524	0.57613	0.703107	0.57613	0.579534	0.862905	0.594337	0.630906	0.610378	0.729162	0.590623
06813000	6.85286	0.590602	0.689466	0.598243	0.590602	0.909843	0.624857	0.643958	0.633898	0.744429	0.59958
06815000	7.00824	0.624794	0.71321	0.624794	0.634095	0.974896	0.674901	0.684603	0.66395	0.80107	0.632695
06817000	7.19675	0.633095	0.703757	0.633095	0.634845	0.980647	0.675051	0.679852	0.6684	0.79922	0.633645
06817500	7.24306	0.637455	0.704073	0.637455	0.645026	1.00971	0.705513	0.691367	0.683031	0.799648	0.646555
06820500	7.10331	0.615092	0.692739	0.615092	0.634395	0.984748	0.679602	0.683803	0.657049	0.792619	0.627594
06847000	5.50887	0.404744	0.587771	0.560351	0.470571	0.583192	0.404744	0.425944	0.426999	0.555959	0.501962
06860000	4.56312	0.358154	0.627911	0.562884	0.46752	0.497775	0.358154	0.380157	0.378057	0.53413	0.499025
06868000	6.98767	0.572323	0.655238	0.572323	0.574409	0.990612	0.685327	0.675417	0.660814	0.732093	0.608484
06869500	6.93615	0.520628	0.600481	0.53018	0.520628	0.834325	0.561534	0.578537	0.582687	0.661849	0.541431
06883000	6.04232	0.516572	0.683939	0.533058	0.516572	0.758745	0.526107	0.559883	0.542248	0.653455	0.539376
06884400	6.90091	0.58284	0.675667	0.58284	0.606386	0.934418	0.647313	0.651442	0.633444	0.73946	0.611563
06884500	6.99224	0.637159	0.728989	0.652001	0.637159	1.14445	0.778161	0.725417	0.759078	0.815796	0.704479
06885500	6.86815	0.599654	0.698475	0.599654	0.606303	0.901827	0.616863	0.64156	0.620495	0.750014	0.616081
06888500	6.91314	0.516247	0.597409	0.531343	0.516247	0.803468	0.522757	0.570571	0.546271	0.632415	0.528312
06890500	7.15742	0.687786	0.768753	0.696243	0.687786	1.10037	0.787883	0.740607	0.753917	0.881048	0.712325
06892000	7.17643	0.623093	0.6946	0.623093	0.636195	0.970946	0.66355	0.678602	0.644747	0.787068	0.631595
06894000	6.71186	0.600924	0.716253	0.600924	0.614337	0.880237	0.623129	0.651964	0.628856	0.758666	0.606249
06897500	7.3616	0.632495	0.687345	0.632495	0.657849	1.02505	0.703906	0.701955	0.671251	0.807921	0.651298
06898000	7.1073	0.595889	0.670735	0.595889	0.615242	0.955643	0.648247	0.66615	0.631795	0.758664	0.609041
06899500	7.23342	0.626394	0.692777	0.626394	0.645147	0.986698	0.675301	0.687053	0.658849	0.79787	0.636445
06908000	7.33455	0.652798	0.712025	0.652798	0.677652	1.0323	0.714157	0.707306	0.678902	0.835375	0.672801
06913500	7.0626	0.59689	0.676113	0.59689	0.60204	0.926389	0.642546	0.649347	0.642446	0.754463	0.60329
06914000	7.09862	0.606	0.68295	0.641096	0.653576	0.912082	0.624847	0.636665	0.606	0.764568	0.643134
06928000	7.35783	0.575555	0.625788	0.575555	0.60943	0.985133	0.667835	0.673251	0.635871	0.705002	0.603164
06933500	7.18308	0.542581	0.604288	0.542581	0.579637	0.879582	0.579287	0.613442	0.566085	0.670551	0.573536
07019000	7.23474	0.572786	0.633373	0.572786	0.613392	0.946542	0.631745	0.655248	0.609741	0.720458	0.60319
07029500	7.52752	0.551636	0.58626	0.551636	0.617819	1.06806	0.735873	0.704831	0.654102	0.747833	0.618692
07049000	7.03066	0.558619	0.635637	0.558619	0.591729	0.93816	0.631925	0.656016	0.613244	0.698402	0.599974
07052500	7.06982	0.53598	0.6065	0.53598	0.568635	0.875631	0.571886	0.622493	0.563485	0.654948	0.556633
07056000	7.285	0.553383	0.607696	0.553383	0.578737	0.884683	0.565285	0.618343	0.558034	0.655398	0.565485
07057500	6.71637	0.486273	0.579209	0.510877	0.506176	0.761864	0.486273	0.542381	0.502275	0.589438	0.517778
07058000	6.7938	0.53126	0.625582	0.53126	0.542238	0.823971	0.540775	0.590851	0.547118	0.64599	0.546203
07067000	7.00033	0.53348	0.609663	0.53348	0.556183	0.834775	0.546632	0.589288	0.547982	0.640596	0.557934
07068000	6.88199	0.514077	0.597592	0.516377	0.53068	0.79787	0.514077	0.558234	0.522478	0.607291	0.539181
07069500	6.86924	0.55918	0.651228	0.55918	0.561874	0.840937	0.563045	0.607204	0.569546	0.671918	0.559941
07072000	6.87802	0.491743	0.571959	0.5125	0.496158	0.763303	0.491743	0.541399	0.516456	0.590654	0.506193
07074000	7.16392	0.602635	0.672967	0.602635	0.628053	0.931303	0.62694	0.662489	0.619736	0.741786	0.614876
07144200	6.91796	0.574386	0.664226	0.574386	0.589788	0.889133	0.59739	0.615792	0.596389	0.717708	0.590139
07144780	6.13442	0.482875	0.629726	0.482875	0.483463	0.755329	0.502572	0.56159	0.523078	0.60907	0.506247
07147070	6.81928	0.584975	0.68626	0.584975	0.589382	0.889482	0.600735	0.629182	0.605676	0.723339	0.5998
07147800	7.02053	0.554683	0.63207	0.554683	0.566635	0.881482	0.588888	0.615492	0.590389	0.686353	0.568935
07152000	6.84373	0.577087	0.674587	0.577087	0.586588	0.883583	0.605391	0.631195	0.607991	0.722158	0.588338
07163000	5.70345	0.51173	0.717782	0.639976	0.582885	0.713405	0.51173	0.523579	0.526451	0.674267	0.599342
07172000	6.96074	0.526979	0.605659	0.544382	0.556283	0.809221	0.526979	0.569185	0.53098	0.633445	0.552083
07177500	7.15178	0.606291	0.678199	0.606291	0.616743	0.902335	0.622693	0.629444	0.623994	0.740911	0.616492
07183000	7.13782	0.573586	0.642869	0.573586	0.575386	0.93114	0.629944	0.642146	0.635995	0.729359	0.579337
07186000	7.06708	0.580887	0.657569	0.580887	0.592939	0.899335	0.60319	0.631945	0.594589	0.710157	0.584388
07196500	6.47102	0.448717	0.554741	0.46627	0.476471	0.715007	0.448717	0.514177	0.472121	0.543982	0.482922
07197000	7.09669	0.515337	0.580933	0.52781	0.544846	0.814024	0.515337	0.573848	0.522639	0.603204	0.537444
07211500	6.46613	0.582139	0.720231	0.604786	0.591398	0.832041	0.582139	0.601774	0.598427	0.748592	0.608412
07221000	6.96804	0.551331	0.632982	0.560485	0.551331	0.865158	0.589577	0.622206	0.600191	0.715152	0.565821
07222500	4.40198	0.353196	0.641884	0.649781	0.475514	0.502022	0.353196	0.369538	0.372964	0.526564	0.506852
07243500	7.16374	0.539481	0.602457	0.539481	0.569285	0.924839	0.614592	0.647947	0.59734	0.691754	0.560984
07252000	7.19235	0.519949	0.578336	0.519949	0.553519	0.855869	0.548071	0.602223	0.540752	0.630675	0.530351
07261000	7.14176	0.586474	0.656952	0.586474	0.611173	0.913672	0.618046	0.648803	0.596959	0.714627	0.596144
07288500	7.28259	0.519674	0.570868	0.519674	0.601299	0.952248	0.647587	0.652298	0.612632	0.682478	0.605119
07289500	7.62283	0.624164	0.655047	0.624164	0.662439	1.14445	0.821074	0.742103	0.721005	0.823496	0.675813
07290000	7.63042	0.591296	0.619936	0.591296	0.627774	1.05791	0.71981	0.70578	0.661293	0.766236	0.627519
07307800	6.43687	0.615819	0.765365	0.661408	0.650264	0.8586	0.615819	0.634344	0.627831	0.818366	0.651856
07340000	7.25199	0.613899	0.67722	0.613899	0.647169	1.02564	0.725541	0.705455	0.685265	0.807806	0.643691
07346000	7.02567	0.448921	0.511177	0.48592	0.448921	0.782932	0.514315	0.507979	0.538173	0.562265	0.498514
07346050	7.0387	0.531462	0.604046	0.531462	0.569413	0.920147	0.618369	0.635017	0.577525	0.668101	0.569836
07346070	7.07772	0.472725	0.534325	0.472725	0.506877	0.842632	0.533088	0.585872	0.516635	0.588571	0.513313
07348000	6.06968	0.475256	0.6264	0.488668	0.493411	0.730249	0.497745	0.510864	0.475256	0.574114	0.509751
07363500	7.4506	0.498778	0.535557	0.498778	0.559342	0.979523	0.630756	0.658262	0.581805	0.667023	0.55817
07375500	6.7339	0.601131	0.714156	0.601131	0.630716	0.892978	0.61556	0.634037	0.609436	0.755904	0.627809
07378000	6.9938	0.69658	0.796797	0.731095	0.734364	0.999429	0.705766	0.703742	0.69658	0.896559	0.723621
07378500	7.08703	0.664348	0.749931	0.664348	0.69767	0.998806	0.698708	0.692583	0.676545	0.841646	0.684798
08013500	7.38821	0.550295	0.595862	0.550295	0.603808	0.998309	0.674776	0.675376	0.625136	0.725289	0.60468
08015500	7.22671	0.550832	0.609773	0.550832	0.604533	0.990689	0.680429	0.68324	0.63194	0.743558	0.599965
08032000	7.09312	0.454068	0.512122	0.454068	0.480472	0.821573	0.529729	0.580337	0.53108	0.580137	0.490024
08033500	7.32032	0.46667	0.51	0.46667	0.495474	0.880332	0.556934	0.612542	0.544732	0.592739	0.497025
08055500	6.79762	0.6641	0.781567	0.690304	0.6641	0.961794	0.696604	0.676101	0.712157	0.852328	0.675101
08085500	6.3602	0.516477	0.649637	0.558684	0.551733	0.759664	0.516477	0.541981	0.517978	0.633395	0.556233
08095000	6.96954	0.546353	0.627132	0.552975	0.546353	0.822586	0.546659	0.581754	0.561125	0.655562	0.552007
08103800	6.64783	0.54721	0.658512	0.567778	0.54721	0.848859	0.580133	0.608424	0.599368	0.701088	0.567708
08146000	6.46979	0.491638	0.607918	0.50669	0.491638	0.771202	0.511545	0.557672	0.534743	0.624353	0.515753
08150000	6.21893	0.345458	0.444395	0.418746	0.345458	0.571359	0.362312	0.407546	0.413744	0.448921	0.401294
08150700	6.24146	0.445513	0.571037	0.488885	0.445513	0.733327	0.47591	0.515652	0.513384	0.558751	0.488703
08167500	6.59988	0.428864	0.519845	0.46897	0.428864	0.687753	0.435015	0.487823	0.471421	0.521628	0.457569
08171000	6.70368	0.429664	0.512751	0.476471	0.429664	0.676501	0.430715	0.480322	0.475321	0.53223	0.459469
08171300	6.56871	0.444897	0.541839	0.479939	0.449743	0.688944	0.444897	0.493589	0.470543	0.531525	0.471725
08172000	6.70541	0.478472	0.570849	0.516277	0.478472	0.756463	0.491124	0.529079	0.524629	0.593789	0.502075
08189500	6.66614	0.501325	0.601638	0.545682	0.511327	0.755413	0.501325	0.53133	0.527579	0.625844	0.529579
08205500	5.16616	0.355153	0.549969	0.448667	0.405711	0.542231	0.355153	0.377957	0.372106	0.441366	0.444517
08340500	4.06313	0.396594	0.780864	0.729033	0.522857	0.547375	0.396594	0.408111	0.417297	0.572176	0.545185
09127998	0	0		0	0	0	0	0	0	0	0
09132500	7.35503	0.53058	0.577107	0.53058	0.540581	0.949092	0.642646	0.634745	0.60244	0.700205	0.545932
09251000	6.89297	0.461469	0.535582	0.461469	0.477922	0.837626	0.545482	0.59769	0.529779	0.607591	0.483773
09292500	7.02434	0.488273	0.556093	0.488273	0.506326	0.831925	0.556984	0.574536	0.526429	0.640696	0.510127
09299500	6.95565	0.511777	0.588617	0.511777	0.516477	0.832075	0.554383	0.575786	0.53448	0.658399	0.519978
09430500	6.64312	0.478272	0.57596	0.478272	0.480422	0.789618	0.514077	0.557684	0.526029	0.60104	0.500225
09431500	6.82215	0.538417	0.631376	0.538417	0.54375	0.896617	0.609977	0.642775	0.607397	0.70906	0.556135
09442692	3.99224	0.288507	0.578135	0.445973	0.338462	0.434389	0.288507	0.323258	0.330045	0.434389	0.406244
09444500	6.71365	0.523429	0.623719	0.53058	0.523429	0.840376	0.570086	0.605841	0.582987	0.66965	0.540531
09497500	7.02304	0.523979	0.596868	0.523979	0.53343	0.885933	0.591489	0.624194	0.582837	0.6669	0.543982
10296000	7.22789	0.498713	0.551987	0.498713	0.514762	0.902296	0.59349	0.62917	0.56538	0.661368	0.521575
10296500	7.21533	0.503502	0.558257	0.503502	0.516904	0.925622	0.613378	0.636199	0.573412	0.670913	0.527107
10301500	7.11242	0.537681	0.60478	0.537681	0.553833	0.921638	0.629444	0.633645	0.616092	0.718308	0.563635
10309000	7.1038	0.512577	0.577242	0.512577	0.519578	0.908236	0.60124	0.642546	0.581287	0.675501	0.526879
10312000	6.75337	0.455583	0.53968	0.45925	0.455583	0.758914	0.484617	0.536828	0.48207	0.561125	0.476161
11025500	5.29493	0.361004	0.545434	0.448367	0.407561	0.540031	0.361004	0.383508	0.371856	0.452218	0.414562
11080500	6.52208	0.386771	0.474415	0.436185	0.386771	0.674715	0.424457	0.465764	0.465074	0.504484	0.431097
11138500	6.70844	0.393952	0.469799	0.443084	0.393952	0.655232	0.407409	0.447306	0.446462	0.497704	0.429521
11160000	6.69277	0.483414	0.577834	0.511261	0.483414	0.758799	0.490655	0.535115	0.51387	0.604867	0.505884
11210500	7.26575	0.518519	0.570918	0.518519	0.519514	1.03564	0.70908	0.698925	0.644962	0.685982	0.559538
11213500	7.49875	0.515128	0.549561	0.515128	0.527419	0.955169	0.6419	0.653876	0.595099	0.666089	0.538371
11222000	7.30716	0.490562	0.537075	0.519692	0.490562	1.0564	0.712421	0.675833	0.664414	0.665579	0.549755
11224500	4.41788	0.299445	0.542242	0.39876	0.349952	0.447517	0.299445	0.310147	0.308696	0.367455	0.373606
11281000	6.9953	0.4837	0.553171	0.499491	0.4837	0.806846	0.514059	0.568663	0.5353	0.617767	0.497351
11342000	7.15324	0.53944	0.603295	0.545244	0.53944	0.863184	0.572546	0.601968	0.570477	0.662831	0.549886
11355500	6.31391	0.412715	0.522928	0.441603	0.412715	0.686497	0.457172	0.498431	0.484994	0.549932	0.448529
11401500	7.27471	0.497904	0.547546	0.497904	0.507065	0.907017	0.593043	0.635014	0.572327	0.656388	0.514609
11403000	7.42447	0.504875	0.544011	0.504875	0.518864	0.970114	0.654833	0.663735	0.610322	0.662887	0.536986
11413000	7.26684	0.524129	0.577009	0.53028	0.524129	0.86748	0.556433	0.591139	0.558734	0.635395	0.528629
11427000	6.60367	0.446217	0.540568	0.459569	0.446217	0.718708	0.449067	0.512177	0.478722	0.553033	0.459869
11497500	7.03134	0.55076	0.626635	0.55076	0.557965	0.957418	0.667123	0.668852	0.63153	0.731249	0.578356
11501000	6.97972	0.443052	0.507817	0.443052	0.471679	0.840159	0.547932	0.590465	0.531581	0.598971	0.486705
11530000	7.41773	0.506376	0.546125	0.506376	0.526279	0.892184	0.572886	0.605441	0.561334	0.632195	0.527729
11532500	7.43331	0.581287	0.625602	0.586688	0.604941	0.918138	0.589838	0.618243	0.581487	0.687503	0.581287
12027500	7.58335	0.570586	0.601935	0.570586	0.618093	1.00925	0.6694	0.684153	0.618843	0.73021	0.59919
12098500	6.90989	0.621693	0.719772	0.621693	0.630295	0.993849	0.698455	0.715907	0.686153	0.813622	0.631095
12134500	7.24901	0.636495	0.702436	0.636495	0.66715	1.03195	0.712357	0.719958	0.676201	0.816522	0.654398
12144500	6.97306	0.642817	0.737487	0.642817	0.662257	1.00429	0.702379	0.715235	0.673374	0.821129	0.66499
12149000	7.28746	0.661599	0.726288	0.661599	0.683753	1.05866	0.741461	0.73391	0.699505	0.850528	0.673901
12340000	7.18522	0.444067	0.494423	0.444067	0.486773	0.852528	0.547282	0.584888	0.521328	0.593589	0.490824
12358500	7.31071	0.46517	0.509028	0.46517	0.501675	0.883533	0.562534	0.609191	0.53533	0.614992	0.502425
12413000	7.40982	0.512277	0.553079	0.512277	0.557784	0.953443	0.620793	0.648347	0.584238	0.677252	0.552333
12413500	7.44272	0.517468	0.556214	0.517468	0.56423	0.980113	0.655536	0.663195	0.601384	0.69007	0.562819
12449500	7.31232	0.462052	0.505506	0.462052	0.486376	0.928281	0.623238	0.626266	0.555173	0.617288	0.512997
12449950	7.24038	0.441437	0.487751	0.441437	0.467997	0.86456	0.551073	0.585751	0.523822	0.58166	0.486437
12459000	7.42816	0.501975	0.540619	0.501975	0.539881	0.958844	0.621993	0.658049	0.574986	0.654048	0.53573
12462500	7.44313	0.498426	0.535716	0.498426	0.54011	0.98104	0.647844	0.674401	0.585832	0.660164	0.545722
13186000	7.29601	0.526079	0.57684	0.526079	0.556533	0.972946	0.6669	0.653248	0.609941	0.707006	0.553683
13200000	7.3152	0.499237	0.545972	0.499237	0.522508	0.920286	0.59801	0.634708	0.574159	0.657611	0.526668
13298500	7.0881	0.534411	0.603164	0.534411	0.554957	1.00595	0.712024	0.675199	0.635792	0.718873	0.573931
13302500	6.94827	0.483373	0.556538	0.483373	0.517828	0.894884	0.608791	0.630395	0.568335	0.656298	0.520978
13336500	7.39446	0.53088	0.574354	0.53088	0.561634	0.978847	0.650798	0.6634	0.59869	0.697455	0.555983
13337000	7.45544	0.539681	0.5791	0.539681	0.569185	0.994149	0.66335	0.671451	0.610242	0.707656	0.562084
13340500	7.32159	0.575025	0.628307	0.575025	0.596299	1.05954	0.756798	0.702669	0.668051	0.76221	0.610524
13340600	7.41915	0.572819	0.617665	0.572819	0.593603	1.03778	0.718999	0.693966	0.653712	0.749903	0.599243
13351000	7.08352	0.476064	0.537658	0.476064	0.48619	0.847267	0.538249	0.606001	0.529078	0.614907	0.496793
14080500	6.90706	0.382189	0.442665	0.43044	0.382189	0.655047	0.438889	0.410789	0.454471	0.48739	0.430878
14101500	7.16209	0.531838	0.59406	0.531838	0.544429	0.927012	0.624828	0.657682	0.597679	0.69139	0.54797
14113000	6.92578	0.491474	0.567704	0.491474	0.500625	0.835225	0.548432	0.60089	0.548982	0.631695	0.511727
14232500	7.19951	0.550336	0.611525	0.550336	0.578034	0.942782	0.635821	0.669548	0.606586	0.714026	0.57866
14233400	7.27529	0.560944	0.61682	0.560944	0.598352	0.984053	0.669967	0.692376	0.625741	0.736009	0.598352
14308000	7.50149	0.584454	0.623293	0.584454	0.616035	0.978759	0.648533	0.666004	0.623523	0.732019	0.595762
14321000	7.32831	0.568867	0.621008	0.568867	0.60162	0.963987	0.644713	0.666412	0.614711	0.736196	0.592145
14359000	6.83402	0.53749	0.629193	0.53749	0.538509	0.856714	0.580888	0.613998	0.587306	0.688722	0.549256
